# Supplementary material for: Immune Mechanisms of Resistance to Cediranib in Ovarian Cancer
Source: Mol Cancer Ther. 2022 Mar 21;21(6):1030–43. doi: 10.1158/1535-7163.MCT-21-0689 (PMC9167758; doi:10.1158/1535-7163.MCT-21-0689)
Supplement: Supplementary Table [file mct-21-0689_supplementary_table_1_suppst1.xlsx]

## Sheet: STable1a
Supplementary Table 1A. GSVA scores and cluster annotation for IL6/Angiogenesis clusters.
SampleID	Cluster	IL6_HALLMARK	KEGG_JAK_STAT	LU_TUMANGIO_UP
TCGA.24.1423.01	cluster1	0.0188923	-0.0623864	0.1073
TCGA.61.2109.01	cluster1	0.00482929	-0.0490425	0.0722466
TCGA.25.1320.01	cluster1	0.0390146	-0.0985111	0.077375
TCGA.61.2009.01	cluster1	0.0284787	-0.109548	0.0772988
TCGA.13.1511.01	cluster1	0.0471106	-0.123094	0.0733535
TCGA.04.1337.01	cluster1	-0.0284831	-0.10555	0.228614
TCGA.09.1669.01	cluster1	-0.0613662	-0.0749821	0.22162
TCGA.36.2544.01	cluster1	0.0251477	-0.112686	0.162628
TCGA.24.0979.01	cluster1	-0.088324	-0.0703795	0.145568
TCGA.29.2434.01	cluster1	-0.097149	-0.111126	0.161484
TCGA.13.1509.01	cluster1	-0.102915	-0.0921326	0.0770496
TCGA.13.0916.01	cluster1	0.0376507	-0.235237	0.226528
TCGA.13.0906.01	cluster1	0.0306662	-0.22573	0.162742
TCGA.13.1497.01	cluster1	0.0274516	-0.211276	0.137073
TCGA.10.0926.01	cluster1	-0.0354211	-0.172007	0.100536
TCGA.61.1916.02	cluster1	-0.0827755	-0.128991	0.108166
TCGA.36.2540.01	cluster1	-0.0847015	-0.168605	0.13076
TCGA.13.1505.01	cluster1	-0.0771284	-0.220891	0.17045
TCGA.24.1418.01	cluster1	-0.0996952	-0.218085	0.127404
TCGA.23.1118.01	cluster1	-0.113981	-0.232231	0.0880183
TCGA.36.2548.01	cluster1	0.107649	-0.314947	-0.0769892
TCGA.29.1692.01	cluster1	0.141787	-0.271858	0.0815865
TCGA.59.2350.01	cluster1	0.125681	-0.24195	-0.0104386
TCGA.24.1424.01	cluster1	0.0549431	-0.201682	0.0811566
TCGA.13.0905.01	cluster1	0.0471505	-0.164002	0.0452016
TCGA.61.2610.02	cluster1	0.0564679	-0.183498	0.0203094
TCGA.61.1914.01	cluster1	0.0318046	-0.233549	0.0292529
TCGA.29.1784.01	cluster1	0.0497086	-0.267904	0.00764221
TCGA.24.1557.01	cluster1	-0.176683	-0.248041	-0.0665098
TCGA.61.2612.01	cluster1	-0.227475	-0.184332	0.0477735
TCGA.24.1466.01	cluster1	-0.143728	-0.12925	-0.0259758
TCGA.24.1419.01	cluster1	-0.179887	-0.111351	-0.034218
TCGA.24.2260.01	cluster1	-0.235451	-0.0125658	0.11184
TCGA.36.2542.01	cluster1	-0.267886	-0.0184571	0.0983562
TCGA.24.0982.01	cluster1	-0.307469	-0.078749	0.0609032
TCGA.23.2643.01	cluster1	-0.293707	-0.139331	0.0539128
TCGA.04.1331.01	cluster1	-0.251923	-0.0573115	-0.0299755
TCGA.24.2295.01	cluster1	-0.239537	-0.0194929	0.016397
TCGA.23.1031.01	cluster1	-0.230838	-0.0624954	0.0463711
TCGA.24.1474.01	cluster1	-0.0511734	-0.254678	-0.0463724
TCGA.04.1362.01	cluster1	-0.0614121	-0.133883	-0.0228516
TCGA.25.2393.01	cluster1	-0.0673353	-0.171826	-0.00373238
TCGA.57.1992.01	cluster1	-0.00284269	-0.148802	-0.0444778
TCGA.24.1469.01	cluster1	-0.0472829	-0.159239	-0.0741331
TCGA.61.2008.01	cluster1	-0.03167	-0.22122	-0.202624
TCGA.24.1416.01	cluster1	-0.165082	-0.155189	-0.178399
TCGA.24.1558.01	cluster1	-0.184806	-0.138305	-0.117037
TCGA.61.1741.01	cluster1	-0.163634	-0.167565	-0.112554
TCGA.13.1491.01	cluster1	-0.0783523	-0.04263	-0.131169
TCGA.23.2081.01	cluster1	-0.0694078	0.0290071	-0.0994188
TCGA.13.0765.01	cluster1	-0.0471886	0.0397889	-0.137403
TCGA.13.1495.01	cluster1	-0.0308794	0.0098863	-0.138174
TCGA.04.1525.01	cluster1	-0.200277	0.00340957	-0.121749
TCGA.61.1899.01	cluster1	-0.167777	0.0224031	-0.0171716
TCGA.36.2534.01	cluster1	-0.180331	0.0156626	-0.064856
TCGA.13.0910.01	cluster1	-0.137239	-0.0213749	-0.0731439
TCGA.13.0720.01	cluster1	-0.095956	-0.0359376	-0.0282355
TCGA.13.1500.01	cluster1	-0.121059	-0.0285512	-0.0464764
TCGA.29.1766.01	cluster1	0.0155014	0.00952721	0.0194347
TCGA.04.1648.01	cluster1	-0.0564864	-0.0287878	0.0564235
TCGA.25.1329.01	cluster1	-0.0577579	0.0115241	0.0159221
TCGA.13.0725.01	cluster1	-0.0522242	-0.0790325	-0.0238415
TCGA.24.2024.01	cluster1	-0.0921663	-0.066294	-0.0177834
TCGA.13.0797.01	cluster1	-0.115229	-0.0349333	0.057956
TCGA.25.1314.01	cluster1	-0.141346	-0.0237506	0.0362593
TCGA.23.1029.01	cluster1	-0.145936	-0.00500259	0.0145524
TCGA.13.0766.01	cluster1	0.0779615	-0.0820066	-0.0645604
TCGA.29.1769.01	cluster1	0.0642075	-0.0707381	-0.0809638
TCGA.61.1724.01	cluster1	-0.0241336	-0.137746	-0.14146
TCGA.61.1916.01	cluster1	-0.0579684	-0.130526	-0.129563
TCGA.61.1736.01	cluster1	-0.000892638	-0.101842	-0.0956493
TCGA.30.1862.01	cluster1	-0.00682232	-0.0853343	-0.12291
TCGA.29.1693.01	cluster1	-0.0434885	-0.0861655	-0.0757567
TCGA.24.2033.01	cluster1	-0.0423412	-0.0853025	-0.127243
TCGA.13.0903.01	cluster2	-0.0126408	0.253564	0.174817
TCGA.30.1892.01	cluster2	-0.0608447	0.22184	0.150659
TCGA.13.0714.01	cluster2	-0.0548253	0.254866	0.109505
TCGA.30.1859.01	cluster2	-0.0576719	0.251849	0.0777349
TCGA.13.0883.01	cluster2	0.0498029	0.266264	0.0875785
TCGA.13.1404.01	cluster2	0.0366577	0.274849	0.075884
TCGA.04.1349.01	cluster2	0.0068456	0.276777	0.0548195
TCGA.23.1117.01	cluster2	0.100818	0.276247	0.133671
TCGA.13.0901.01	cluster2	0.108043	0.167599	0.149037
TCGA.13.0791.01	cluster2	0.0594842	0.192593	0.0244072
TCGA.61.1734.01	cluster2	0.0390049	0.10339	0.0453693
TCGA.61.1728.01	cluster2	0.0427742	0.179319	-0.0709965
TCGA.13.1403.01	cluster2	0.00893275	0.170623	-0.0422993
TCGA.13.1412.01	cluster2	-0.0238925	0.217775	0.0455642
TCGA.25.1318.01	cluster2	-0.0321793	0.192309	-0.0169729
TCGA.09.1665.01	cluster2	-0.0197371	0.271527	-0.0205888
TCGA.13.1482.01	cluster2	-0.170145	0.109022	0.1604
TCGA.23.1109.01	cluster2	-0.202796	0.11455	0.175142
TCGA.13.0762.01	cluster2	-0.174759	0.165607	0.151651
TCGA.13.1510.01	cluster2	-0.11584	0.109212	0.175533
TCGA.04.1335.01	cluster2	-0.246451	0.0801616	0.125168
TCGA.13.0726.01	cluster2	-0.191737	0.210417	0.0821083
TCGA.29.2425.01	cluster2	-0.205732	0.139827	0.05106
TCGA.04.1342.01	cluster2	-0.0403487	0.0962268	0.013608
TCGA.61.2102.01	cluster2	-0.0355282	0.0441027	0.0339556
TCGA.25.2397.01	cluster2	-0.0680896	0.0522232	0.0205336
TCGA.13.0757.01	cluster2	-0.0854254	0.0779868	0.0481535
TCGA.25.1627.01	cluster2	-0.111141	0.024534	0.202373
TCGA.13.0793.01	cluster2	-0.142149	0.0473224	0.10068
TCGA.13.0807.01	cluster2	-0.0955462	0.32716	0.157049
TCGA.04.1652.01	cluster2	-0.125385	0.312756	0.143623
TCGA.09.1661.01	cluster2	-0.102386	0.328276	0.2254
TCGA.13.0894.01	cluster2	-0.064525	0.228094	0.388971
TCGA.04.1360.01	cluster2	-0.102063	0.134515	0.298886
TCGA.57.1583.01	cluster2	-0.162931	0.228239	-0.115111
TCGA.10.0935.01	cluster2	-0.305403	0.205329	-0.133384
TCGA.13.0912.01	cluster2	-0.238788	0.0565639	0.0386142
TCGA.29.1703.01	cluster2	-0.230092	0.0760944	0.00338287
TCGA.25.1877.01	cluster2	-0.277911	0.128791	-0.0455471
TCGA.25.1632.01	cluster2	-0.333254	0.0583477	-0.000356789
TCGA.23.1021.01	cluster3	-0.248491	-0.0735861	-0.452385
TCGA.24.1552.01	cluster3	-0.307534	-0.0698016	-0.432673
TCGA.23.1032.01	cluster3	-0.374072	-0.166345	-0.465856
TCGA.09.1675.01	cluster3	-0.37073	-0.0417603	-0.415803
TCGA.13.0799.01	cluster3	-0.358915	-0.121046	-0.387534
TCGA.42.2589.01	cluster3	-0.206257	-0.260415	-0.521612
TCGA.24.1464.01	cluster3	-0.235307	-0.137236	-0.433253
TCGA.10.0936.01	cluster3	-0.180078	-0.198697	-0.457775
TCGA.25.1325.01	cluster3	-0.190362	-0.211928	-0.356443
TCGA.61.1733.01	cluster3	-0.142575	-0.166852	-0.37195
TCGA.29.1771.01	cluster3	-0.118647	-0.171535	-0.43359
TCGA.13.0904.01	cluster3	-0.0782692	0.319608	-0.463023
TCGA.24.1923.01	cluster3	0.0016647	0.210167	-0.327209
TCGA.13.0764.01	cluster3	0.0118091	0.185726	-0.385709
TCGA.36.2547.01	cluster3	-0.0674661	0.156264	-0.28364
TCGA.04.1536.01	cluster3	-0.0318379	0.127717	-0.328892
TCGA.24.1471.01	cluster3	-0.19657	0.0547617	-0.578411
TCGA.24.0966.01	cluster3	-0.27806	0.0320862	-0.578854
TCGA.20.0996.01	cluster3	-0.163604	0.146857	-0.567904
TCGA.61.1915.01	cluster3	-0.0344556	0.0971869	-0.522693
TCGA.25.1319.01	cluster3	-0.0888604	0.0427923	-0.490286
TCGA.59.2372.01	cluster3	-0.0334863	-0.0556616	-0.378222
TCGA.09.1672.01	cluster3	-0.0594497	-0.0446237	-0.418436
TCGA.25.1312.01	cluster3	-0.0534702	-0.071703	-0.417118
TCGA.29.1696.01	cluster3	-0.0808339	-0.0267401	-0.438992
TCGA.25.1321.01	cluster3	-0.14242	-0.0151521	-0.479479
TCGA.24.1565.01	cluster3	-0.0901999	-0.082955	-0.512469
TCGA.09.2055.01	cluster3	-0.0959699	-0.106288	-0.533453
TCGA.09.2049.01	cluster3	-0.411338	0.218638	-0.149494
TCGA.30.1853.01	cluster3	-0.422181	0.0239119	-0.339535
TCGA.04.1519.01	cluster3	-0.362642	0.0569584	-0.244565
TCGA.61.2110.01	cluster3	-0.335164	0.0578615	-0.302905
TCGA.04.1655.01	cluster3	-0.368245	0.0197632	-0.314504
TCGA.59.2349.01	cluster3	-0.023146	0.20796	-0.243242
TCGA.20.1687.01	cluster3	-0.0573762	0.156545	-0.197857
TCGA.13.0884.01	cluster3	-0.0835757	0.26665	-0.291988
TCGA.04.1638.01	cluster3	-0.196466	0.252083	-0.252266
TCGA.04.1649.01	cluster3	-0.190021	0.216664	-0.311685
TCGA.24.1560.01	cluster3	-0.113138	0.110312	-0.234863
TCGA.29.1775.01	cluster3	-0.15855	0.0634412	-0.268958
TCGA.23.1111.01	cluster3	-0.178028	0.0639157	-0.144338
TCGA.57.1584.01	cluster3	-0.157259	0.104004	-0.164413
TCGA.30.1866.01	cluster3	-0.152926	0.0927377	-0.180512
TCGA.24.1467.01	cluster3	-0.229211	0.0330109	-0.191432
TCGA.13.0751.01	cluster3	-0.25687	0.0999213	-0.22055
TCGA.24.1614.01	cluster3	-0.22194	0.0569005	-0.252786
TCGA.13.0921.01	cluster3	-0.185798	0.15289	-0.271716
TCGA.13.0724.01	cluster3	-0.219882	0.149329	-0.342285
TCGA.24.1845.01	cluster3	-0.148236	0.0614493	-0.377091
TCGA.24.1431.01	cluster3	-0.220499	0.0532891	-0.331815
TCGA.10.0925.01	cluster3	-0.194414	0.106551	-0.458168
TCGA.24.1555.01	cluster3	-0.253891	0.0548568	-0.41485
TCGA.24.1426.01	cluster3	-0.231329	-0.0526184	-0.331279
TCGA.29.1776.01	cluster3	-0.188011	-0.0588224	-0.228766
TCGA.04.1361.01	cluster3	-0.214482	-0.0729853	-0.24888
TCGA.29.1761.01	cluster3	-0.188082	-0.131699	-0.256225
TCGA.10.0927.01	cluster3	-0.222813	-0.118777	-0.306745
TCGA.61.1906.01	cluster3	-0.170896	-0.13554	-0.341923
TCGA.61.1918.01	cluster3	-0.170762	-0.114636	-0.316164
TCGA.09.1670.01	cluster3	-0.189876	-0.130383	-0.295399
TCGA.23.1123.01	cluster4	0.284781	0.0557203	0.100716
TCGA.13.1410.01	cluster4	0.272127	0.0201148	0.0641169
TCGA.59.2352.01	cluster4	0.318171	-0.00827345	0.0480195
TCGA.13.1484.01	cluster4	0.194167	0.0596473	0.0452305
TCGA.13.1504.01	cluster4	0.203116	8.17e-05	0.0499989
TCGA.36.2552.01	cluster4	0.307749	-0.0439058	0.045376
TCGA.13.1817.01	cluster4	0.292314	-0.0701174	0.0319471
TCGA.24.1470.01	cluster4	0.289067	-0.0760508	0.0977568
TCGA.29.1688.01	cluster4	0.278369	-0.100864	0.0538732
TCGA.25.2391.01	cluster4	0.285567	-0.039056	-0.00376036
TCGA.24.1551.01	cluster4	0.281764	-0.0907908	-0.00302422
TCGA.29.1694.01	cluster4	0.136973	-0.0285603	0.125706
TCGA.09.2050.01	cluster4	0.0852029	-0.040526	0.0960242
TCGA.24.1563.01	cluster4	0.143669	-0.103487	0.102586
TCGA.59.2348.01	cluster4	0.129454	-0.0951544	0.0854363
TCGA.61.2614.01	cluster4	0.258468	-0.102936	0.175537
TCGA.13.0899.01	cluster4	0.248166	-0.119486	0.124961
TCGA.13.0758.01	cluster4	0.128597	0.0393401	0.147532
TCGA.24.1562.01	cluster4	0.0747663	0.0636702	0.15693
TCGA.24.1846.01	cluster4	0.114933	0.105916	0.127711
TCGA.24.1556.01	cluster4	0.145283	0.0304234	0.0819631
TCGA.29.2428.01	cluster4	0.103771	0.0170869	0.0924035
TCGA.29.1768.01	cluster4	0.179509	0.143767	0.165813
TCGA.13.0805.01	cluster4	0.164076	0.054802	0.197744
TCGA.30.1856.01	cluster4	0.338143	0.0975611	-0.0581672
TCGA.13.1507.01	cluster4	0.319121	0.0408317	-0.0610266
TCGA.13.2057.01	cluster4	0.297388	0.123176	-0.0122419
TCGA.29.1711.01	cluster4	0.239039	0.0880172	-0.0287886
TCGA.24.1436.01	cluster4	0.273505	0.0724082	-0.0600299
TCGA.25.2399.01	cluster4	0.222305	0.0493729	-0.0803213
TCGA.23.1030.01	cluster4	0.149771	0.0871266	-0.00962501
TCGA.24.1920.01	cluster4	0.13511	0.0840943	-0.00627056
TCGA.24.1422.01	cluster4	0.144049	0.0917397	0.00583146
TCGA.29.1777.01	cluster4	0.18619	0.139477	-0.0485615
TCGA.24.1428.01	cluster4	0.191578	0.0972763	-0.129343
TCGA.29.1783.01	cluster4	0.13644	0.106239	-0.109947
TCGA.29.1781.01	cluster4	0.290109	0.169778	0.109495
TCGA.09.1662.01	cluster4	0.270805	0.145133	0.109327
TCGA.23.1027.01	cluster4	0.29491	0.115259	0.103497
TCGA.61.2104.01	cluster4	0.365017	0.152884	0.0945685
TCGA.04.1353.01	cluster4	0.236289	0.191582	0.0304218
TCGA.57.1994.01	cluster4	0.254283	0.137143	0.0384819
TCGA.29.1707.01	cluster4	0.353975	0.0105943	-0.123952
TCGA.04.1348.01	cluster4	0.279008	0.0346321	-0.119324
TCGA.59.2351.01	cluster4	0.224694	-0.0344384	-0.0720741
TCGA.09.2044.01	cluster4	0.259276	-0.0644486	-0.110308
TCGA.13.0924.01	cluster4	0.413788	-0.0519169	-0.0671539
TCGA.23.2079.01	cluster4	0.175007	-0.0012749	0.0205759
TCGA.13.0897.01	cluster4	0.161182	-0.0272417	0.000703139
TCGA.61.2016.01	cluster4	0.120437	-0.0146047	-0.0416753
TCGA.25.1635.01	cluster4	0.140477	-0.075225	-0.0317862
TCGA.24.1549.01	cluster4	0.158797	0.0229861	-0.108047
TCGA.13.1506.01	cluster4	0.160868	-0.0308629	-0.0949726
TCGA.36.2549.01	cluster4	0.159193	-0.0456034	-0.0800807
TCGA.23.2645.01	cluster4	0.224928	-0.188141	-0.0621262
TCGA.13.1496.01	cluster5	0.329205	0.135763	-0.406987
TCGA.09.2056.01	cluster5	0.242869	0.0280031	-0.339237
TCGA.13.2060.01	cluster5	0.360334	0.00952972	-0.467821
TCGA.42.2590.01	cluster5	0.313541	-0.0347355	-0.4754
TCGA.25.1870.01	cluster5	0.058809	0.224792	-0.400305
TCGA.61.2018.01	cluster5	0.110493	0.089858	-0.473987
TCGA.25.2396.01	cluster5	0.215001	0.0421	-0.421803
TCGA.09.2045.01	cluster5	0.153936	0.0585767	-0.397001
TCGA.29.2436.01	cluster5	0.153267	0.0207968	-0.430253
TCGA.09.2051.01	cluster5	0.302486	-0.168846	-0.372095
TCGA.13.0923.01	cluster5	0.197656	-0.107286	-0.358485
TCGA.29.1699.01	cluster5	0.231447	-0.109452	-0.401351
TCGA.42.2588.01	cluster5	0.282132	-0.236651	-0.193371
TCGA.04.1369.01	cluster5	0.179918	-0.19577	-0.137386
TCGA.29.1701.01	cluster5	0.140582	-0.194895	-0.132138
TCGA.36.2551.01	cluster5	0.078063	-0.244217	-0.272827
TCGA.13.1819.01	cluster5	0.108018	-0.27882	-0.209094
TCGA.24.1843.01	cluster5	0.0972678	-0.257598	-0.22994
TCGA.25.2392.01	cluster5	0.25222	0.0760575	-0.202753
TCGA.13.0889.01	cluster5	0.246944	0.0611056	-0.204452
TCGA.29.2432.01	cluster5	0.256652	-0.0349201	-0.195988
TCGA.61.1911.01	cluster5	0.176718	0.00782671	-0.255437
TCGA.23.1119.01	cluster5	0.106063	-0.013981	-0.193151
TCGA.25.1625.01	cluster5	0.124964	-0.0402106	-0.204142
TCGA.59.2355.01	cluster5	0.18103	-0.0858046	-0.288202
TCGA.10.0937.01	cluster5	0.132989	-0.063367	-0.264132
TCGA.24.1928.01	cluster5	0.0773675	0.134897	-0.15261
TCGA.13.0795.01	cluster5	0.128649	0.0944612	-0.204259
TCGA.09.0367.01	cluster5	0.0870705	0.145747	-0.236781
TCGA.61.1904.01	cluster5	0.0683022	0.149733	-0.288408
TCGA.36.2543.01	cluster5	0.0293643	0.0658047	-0.214412
TCGA.13.0803.01	cluster5	-0.0127571	0.0587763	-0.189948
TCGA.61.1995.01	cluster5	-0.0266524	0.0433244	-0.189102
TCGA.24.1105.01	cluster5	0.0313702	0.0448282	-0.112823
TCGA.29.2429.01	cluster5	0.0206083	0.0203159	-0.131125
TCGA.24.1104.01	cluster5	0.0822614	0.0202838	-0.181434
TCGA.10.0931.01	cluster5	0.0150914	0.0126754	-0.194677
TCGA.24.1548.01	cluster5	0.0345559	-0.023073	-0.18173
TCGA.61.2087.01	cluster5	0.012047	-0.0929632	-0.170378
TCGA.13.0887.01	cluster5	0.0198588	-0.0773294	-0.211063
TCGA.61.1725.01	cluster5	-0.0441827	-0.20659	-0.265081
TCGA.23.2084.01	cluster5	-0.0118995	-0.0998358	-0.270401
TCGA.29.2431.01	cluster5	-0.0293194	-0.108225	-0.308425
TCGA.61.1738.01	cluster5	0.119145	-0.1376	-0.350781
TCGA.23.2077.01	cluster5	0.0294878	-0.180196	-0.363538
TCGA.61.1901.01	cluster5	0.113686	-0.0253393	-0.441101
TCGA.04.1516.01	cluster5	0.0361089	-0.0537523	-0.357631
TCGA.57.1993.01	cluster5	0.0316794	0.00877928	-0.418379
TCGA.29.2427.01	cluster6	0.309201	0.269131	-0.0646818
TCGA.13.0792.01	cluster6	0.257678	0.289849	-0.0567399
TCGA.24.0968.01	cluster6	0.289023	0.230415	-0.0732632
TCGA.36.1569.01	cluster6	0.294077	0.205226	-0.0748441
TCGA.04.1346.01	cluster6	0.327495	0.294434	0.00470818
TCGA.61.1727.01	cluster6	0.270189	0.286384	0.00873765
TCGA.24.2261.01	cluster6	0.298533	0.229597	0.0552702
TCGA.42.2593.01	cluster6	0.435423	0.33788	0.0412023
TCGA.24.2029.01	cluster6	0.384104	0.337899	0.0784693
TCGA.23.1124.01	cluster6	0.239343	0.363482	-0.00775039
TCGA.09.2043.01	cluster6	0.195823	0.32455	-0.0420625
TCGA.29.1690.01	cluster6	0.247818	0.352158	-0.0947987
TCGA.13.0885.01	cluster6	0.298166	0.43451	-0.108246
TCGA.36.1578.01	cluster6	0.297054	0.39492	-0.103719
TCGA.24.1930.01	cluster6	0.426506	0.320583	-0.0735256
TCGA.09.0366.01	cluster6	0.442933	0.322323	-0.108017
TCGA.04.1357.01	cluster6	0.406768	0.361767	-0.152215
TCGA.25.1878.01	cluster6	0.367713	0.32055	-0.133062
TCGA.24.2267.01	cluster6	0.470676	0.414233	-0.126477
TCGA.36.1581.01	cluster6	0.381034	0.23864	-0.0483078
TCGA.24.2271.01	cluster6	0.348066	0.226541	-0.074913
TCGA.30.1860.01	cluster6	0.408178	0.217593	-0.0917139
TCGA.31.1950.01	cluster6	0.381314	0.090487	-0.136179
TCGA.24.1842.01	cluster6	0.323654	0.133677	-0.135739
TCGA.24.1924.01	cluster6	0.464484	0.0999941	-0.117839
TCGA.29.1710.01	cluster6	0.386468	0.222078	-0.164036
TCGA.30.1887.01	cluster6	0.349778	0.257387	-0.174466
TCGA.25.1313.01	cluster6	0.35599	0.158934	-0.237818
TCGA.29.1785.01	cluster6	0.28404	0.175198	-0.214887
TCGA.13.0804.01	cluster6	0.16062	0.3294	0.0825183
TCGA.23.1120.01	cluster6	0.143907	0.306744	0.076598
TCGA.04.1654.01	cluster6	0.180848	0.310061	0.0402729
TCGA.29.1778.01	cluster6	0.145375	0.270744	0.015769
TCGA.23.1028.01	cluster6	0.113695	0.256144	-0.026138
TCGA.24.1553.01	cluster6	0.277182	0.209449	-0.143476
TCGA.13.0755.01	cluster6	0.248243	0.213968	-0.154524
TCGA.24.2023.01	cluster6	0.211811	0.203814	-0.19373
TCGA.25.2409.01	cluster6	0.188274	0.294279	-0.192807
TCGA.04.1343.01	cluster6	0.150648	0.241355	-0.1735
TCGA.13.1405.01	cluster6	0.17218	0.28384	-0.0975087
TCGA.61.2111.01	cluster6	0.178009	0.16349	-0.145355
TCGA.13.0801.01	cluster6	0.183619	0.115174	-0.161332
TCGA.23.2072.01	cluster6	0.12524	0.128555	-0.135877
TCGA.04.1367.01	cluster6	0.0679711	0.318674	-0.141445
TCGA.04.1336.01	cluster6	0.0977573	0.202561	-0.132929
TCGA.61.1721.01	cluster6	0.000975778	0.281444	-0.221953
TCGA.61.2017.01	cluster6	0.0382166	0.248891	-0.277715
TCGA.36.2539.01	cluster6	0.242833	0.316958	-0.290723
TCGA.24.1413.01	cluster6	0.217475	0.323923	-0.349725
TCGA.24.2026.01	cluster6	0.272755	0.400309	-0.269501
TCGA.25.1326.01	cluster6	0.29435	0.275831	-0.262184
TCGA.61.1917.01	cluster6	0.239159	0.258628	-0.272812
TCGA.61.1907.01	cluster6	0.307892	0.191974	-0.367946
TCGA.25.1328.01	cluster6	0.121425	0.37137	-0.330031
TCGA.30.1880.01	cluster6	0.0920653	0.295044	-0.304536
TCGA.13.0893.01	cluster6	0.124352	0.231652	-0.301673
TCGA.24.2038.01	cluster6	0.077454	0.282212	-0.393128
TCGA.13.0911.01	cluster7	0.472973	0.14036	0.440829
TCGA.24.1417.01	cluster7	0.443192	0.138928	0.390513
TCGA.24.2290.01	cluster7	0.415849	0.127945	0.473179
TCGA.61.2097.01	cluster7	0.409006	0.108546	0.439197
TCGA.24.2293.01	cluster7	0.524385	0.0592877	0.406348
TCGA.61.2012.01	cluster7	0.541575	0.0456783	0.375612
TCGA.36.2529.01	cluster7	0.538295	0.0832263	0.340162
TCGA.23.2641.01	cluster7	0.478001	-0.00699244	0.422262
TCGA.20.0991.01	cluster7	0.492563	0.169413	0.241379
TCGA.24.1434.01	cluster7	0.458903	0.156495	0.266239
TCGA.29.1704.01	cluster7	0.514014	0.153838	0.301808
TCGA.31.1959.01	cluster7	0.45526	0.20482	0.334951
TCGA.24.1847.01	cluster7	0.425681	0.194389	0.326356
TCGA.13.2061.01	cluster7	0.378641	0.113557	0.307334
TCGA.24.2289.01	cluster7	0.416914	0.0299609	0.258809
TCGA.23.1026.01	cluster7	0.392391	0.0183387	0.23811
TCGA.36.2545.01	cluster7	0.367804	0.0328529	0.272659
TCGA.61.2002.01	cluster7	0.4546	-0.00660368	0.259873
TCGA.13.2066.01	cluster7	0.422621	-0.0464546	0.321976
TCGA.61.1919.01	cluster7	0.428632	0.253247	0.380066
TCGA.25.1630.01	cluster7	0.406522	0.255466	0.371198
TCGA.25.1626.01	cluster7	0.466225	0.26375	0.393938
TCGA.31.1953.01	cluster7	0.447819	0.326173	0.372623
TCGA.09.1668.01	cluster7	0.500059	0.246867	0.499503
TCGA.23.1116.01	cluster7	0.472593	0.260572	0.506632
TCGA.10.0930.01	cluster7	0.419195	0.381501	0.469566
TCGA.09.1667.01	cluster7	0.455293	0.316887	0.472451
TCGA.31.1956.01	cluster7	0.555184	0.307499	0.440209
TCGA.13.1411.01	cluster7	0.548002	0.319187	0.373846
TCGA.25.1623.01	cluster7	0.564266	0.126688	0.578226
TCGA.13.0768.01	cluster7	0.510026	0.104462	0.613304
TCGA.36.1574.01	cluster7	0.268436	0.175783	0.290481
TCGA.61.2000.01	cluster7	0.258771	0.149586	0.24901
TCGA.31.1944.01	cluster7	0.253318	0.201162	0.195497
TCGA.09.1666.01	cluster7	0.266631	0.151755	0.184165
TCGA.04.1365.01	cluster7	0.332894	0.197903	0.282989
TCGA.24.2281.01	cluster7	0.35292	0.160815	0.245843
TCGA.25.1633.01	cluster7	0.334416	0.228248	0.228001
TCGA.13.0886.01	cluster7	0.285503	0.10689	0.192088
TCGA.59.2354.01	cluster7	0.295886	0.103783	0.173777
TCGA.24.2288.01	cluster7	0.369656	0.108946	0.213808
TCGA.13.2065.01	cluster7	0.352032	0.048491	0.208627
TCGA.61.1722.01	cluster7	0.315735	0.0431682	0.220154
TCGA.25.1322.01	cluster7	0.303799	0.0563581	0.258154
TCGA.24.1545.01	cluster7	0.392563	0.265593	0.0995943
TCGA.13.1498.01	cluster7	0.376674	0.254133	0.107393
TCGA.24.0980.01	cluster7	0.384824	0.292461	0.100128
TCGA.36.1580.01	cluster7	0.33829	0.252763	0.123944
TCGA.20.0987.01	cluster7	0.477714	0.221647	0.233173
TCGA.24.1849.01	cluster7	0.442731	0.230309	0.206477
TCGA.24.2035.01	cluster7	0.411371	0.276179	0.237424
TCGA.61.2094.01	cluster7	0.49967	0.215009	0.125924
TCGA.13.0723.01	cluster7	0.411528	0.148761	0.114379
TCGA.61.1895.01	cluster7	0.504777	0.168147	0.0255449
TCGA.25.1631.01	cluster7	0.165702	0.248235	0.277684
TCGA.36.1568.01	cluster7	0.162125	0.229517	0.259703
TCGA.09.1659.01	cluster7	0.202017	0.213814	0.244041
TCGA.31.1951.01	cluster7	0.284374	0.258973	0.355548
TCGA.29.1764.01	cluster7	0.30345	0.291715	0.276596
TCGA.04.1356.01	cluster7	0.134945	0.267088	0.396002
TCGA.30.1891.01	cluster7	0.119516	0.25157	0.310662
TCGA.25.2042.01	cluster7	0.359575	0.222462	0.382248
TCGA.61.1903.01	cluster7	0.354936	0.200974	0.352269
TCGA.30.1867.01	cluster7	0.310573	0.172334	0.438937
TCGA.61.2095.01	cluster7	0.272375	0.195133	0.421555
TCGA.13.1512.01	cluster8	-0.135446	-0.158284	0.524255
TCGA.59.2363.01	cluster8	-0.113607	-0.124116	0.455754
TCGA.13.1481.01	cluster8	-0.0711772	-0.216455	0.593118
TCGA.24.1850.01	cluster8	-0.150285	-0.303231	0.469953
TCGA.29.1698.01	cluster8	-0.216299	-0.270711	0.494639
TCGA.04.1651.01	cluster8	-0.179813	-0.0550841	0.300913
TCGA.10.0928.01	cluster8	-0.0936351	-0.15354	0.30727
TCGA.29.1770.01	cluster8	-0.219157	-0.121957	0.400692
TCGA.13.1501.01	cluster8	-0.238393	-0.116201	0.398433
TCGA.61.2101.01	cluster8	-0.288361	-0.171004	0.37278
TCGA.23.1122.01	cluster8	-0.226577	-0.206756	0.446649
TCGA.36.1577.01	cluster8	-0.213235	-0.201967	0.41822
TCGA.04.1332.01	cluster8	-0.0884538	-0.253821	0.35546
TCGA.30.1718.01	cluster8	-0.0911969	-0.247091	0.341615
TCGA.13.1485.01	cluster8	-0.158652	-0.245254	0.382461
TCGA.61.1743.01	cluster8	-0.215142	0.0697423	0.368319
TCGA.13.1492.01	cluster8	-0.269184	0.0396766	0.292899
TCGA.25.1317.01	cluster8	-0.31915	-0.0509283	0.540879
TCGA.13.0888.01	cluster8	-0.490463	-0.114533	0.339237
TCGA.61.2098.01	cluster8	-0.489785	-0.255658	0.331282
TCGA.23.1121.01	cluster8	-0.34167	-0.263882	0.291101
TCGA.13.1487.01	cluster8	-0.374664	-0.262617	0.255557
TCGA.13.0717.01	cluster8	-0.438416	-0.254656	0.179892
TCGA.24.1567.01	cluster8	-0.359604	-0.261718	0.134698
TCGA.24.0970.01	cluster8	-0.33687	-0.315678	0.143751
TCGA.24.2019.01	cluster8	-0.179357	-0.251998	0.146492
TCGA.29.1763.01	cluster8	-0.18458	-0.159755	0.248048
TCGA.23.1114.01	cluster8	-0.18777	-0.185188	0.29138
TCGA.29.1705.01	cluster8	-0.204823	-0.214454	0.261741
TCGA.04.1341.01	cluster8	-0.30136	-0.158009	0.0838933
TCGA.24.2297.01	cluster8	-0.276152	-0.223905	0.0985609
TCGA.61.2611.02	cluster8	-0.283826	-0.231101	0.109843
TCGA.04.1517.01	cluster8	-0.217836	-0.0590159	0.174331
TCGA.13.0891.01	cluster8	-0.244466	-0.131329	0.16838
TCGA.10.0933.01	cluster8	-0.344968	-0.0781961	0.245854
TCGA.24.2020.01	cluster8	-0.34668	-0.0942823	0.175675
TCGA.30.1861.01	cluster8	-0.34954	-0.167865	0.238138
TCGA.24.2030.01	cluster8	-0.308818	-0.173186	0.18752
TCGA.61.2096.01	cluster9	-0.231917	-0.271517	-0.354276
TCGA.24.1603.01	cluster9	-0.182802	-0.24954	-0.125796
TCGA.20.1685.01	cluster9	-0.173699	-0.349011	-0.138737
TCGA.29.1691.01	cluster9	-0.250555	-0.347389	-0.150198
TCGA.13.0913.01	cluster9	-0.466836	-0.335134	-0.512378
TCGA.20.0990.01	cluster9	-0.438775	-0.211115	-0.454597
TCGA.61.2092.01	cluster9	-0.441076	-0.184921	-0.484164
TCGA.61.2613.01	cluster9	-0.481379	-0.283574	-0.178626
TCGA.04.1371.01	cluster9	-0.511831	-0.273811	-0.196279
TCGA.13.0800.01	cluster9	-0.527752	-0.217151	-0.137223
TCGA.25.1315.01	cluster9	-0.485443	-0.275841	-0.0892397
TCGA.09.0364.01	cluster9	-0.517766	-0.269319	-0.0956461
TCGA.04.1364.01	cluster9	-0.567707	-0.40357	-0.274151
TCGA.20.1684.01	cluster9	-0.519282	-0.334739	-0.23768
TCGA.04.1514.01	cluster9	-0.525404	-0.369951	-0.228219
TCGA.04.1644.01	cluster9	-0.431016	-0.378423	-0.344506
TCGA.29.1774.01	cluster9	-0.514156	-0.36326	-0.338306
TCGA.04.1347.01	cluster9	-0.464131	-0.26305	-0.39249
TCGA.10.0934.01	cluster9	-0.422774	-0.275669	-0.322664
TCGA.09.2048.01	cluster9	-0.40729	-0.28975	-0.365468
TCGA.13.1477.01	cluster9	-0.421437	-0.042696	-0.0152148
TCGA.42.2582.01	cluster9	-0.400179	0.099261	-0.111283
TCGA.25.1634.01	cluster9	-0.493359	0.0189128	-0.0695392
TCGA.13.1409.01	cluster9	-0.476982	-0.00474443	-0.156662
TCGA.36.1575.01	cluster9	-0.448164	-0.106416	-0.343584
TCGA.23.1024.01	cluster9	-0.351471	-0.179545	-0.373868
TCGA.09.0365.01	cluster9	-0.503933	-0.122453	-0.240051
TCGA.23.1110.01	cluster9	-0.486327	-0.171885	-0.216568
TCGA.04.1350.01	cluster9	-0.495336	-0.195584	-0.233242
TCGA.24.1604.01	cluster9	-0.237181	-0.179866	-0.234745
TCGA.36.2533.01	cluster9	-0.299433	-0.0669538	-0.176671
TCGA.36.1570.01	cluster9	-0.301316	-0.109157	-0.231214
TCGA.23.1107.01	cluster9	-0.258228	-0.154001	-0.110974
TCGA.25.1316.01	cluster9	-0.241338	-0.0940772	-0.128381
TCGA.25.2400.01	cluster9	-0.240172	-0.0906232	-0.136526
TCGA.13.0794.01	cluster9	-0.405605	-0.21192	-0.263277
TCGA.30.1714.01	cluster9	-0.355774	-0.151373	-0.182487
TCGA.25.1324.01	cluster9	-0.323604	-0.20658	-0.164134
TCGA.09.1673.01	cluster9	-0.314507	-0.189305	-0.200266
TCGA.04.1542.01	cluster9	-0.408031	-0.0906172	-0.105725
TCGA.10.0938.01	cluster9	-0.429106	-0.142708	-0.126019
TCGA.29.1702.01	cluster9	-0.440144	-0.146408	-0.162909
TCGA.23.1022.01	cluster9	-0.36377	-0.0141925	-0.164437
TCGA.13.1407.01	cluster9	-0.360349	-0.059227	-0.183004
TCGA.20.1686.01	cluster9	-0.361417	-0.0746785	-0.247302
TCGA.25.1871.01	cluster9	-0.429804	-0.0303982	-0.224594
TCGA.24.1852.01	cluster9	-0.515307	-0.288241	0.100006
TCGA.09.1674.01	cluster9	-0.419637	-0.373601	0.100061
TCGA.09.0369.01	cluster9	-0.470699	-0.344769	0.116222
TCGA.29.1697.01	cluster9	-0.400726	-0.471803	-0.0539805
TCGA.36.2532.01	cluster9	-0.469879	-0.298888	0.0058288
TCGA.61.1900.01	cluster9	-0.490375	-0.321608	0.00437829
TCGA.24.2036.01	cluster9	-0.497864	-0.373466	-0.0547487
TCGA.24.1844.01	cluster9	-0.451835	-0.31746	-0.081342
TCGA.29.2414.01	cluster9	-0.457693	-0.336683	-0.0875312
TCGA.09.1664.01	cluster9	-0.308608	-0.108735	-0.0583554
TCGA.61.1910.01	cluster9	-0.313943	-0.179097	-0.0244648
TCGA.23.1113.01	cluster9	-0.403805	-0.15383	-0.0371278
TCGA.04.1646.01	cluster9	-0.376579	-0.197141	-0.0643559
TCGA.25.1323.01	cluster9	-0.38512	-0.186503	-0.0767473
TCGA.23.1809.01	cluster9	-0.303611	-0.176159	0.0647361
TCGA.13.0727.01	cluster9	-0.388286	-0.141319	0.0401678
TCGA.24.1544.01	cluster9	-0.387383	-0.157206	0.0231986
TCGA.04.1351.01	cluster9	-0.413816	-0.257181	0.0708915
TCGA.20.1683.01	cluster9	-0.347938	-0.291125	0.0854905
TCGA.13.1489.01	cluster9	-0.351666	-0.255616	0.0212473
TCGA.09.2054.01	cluster9	-0.348652	-0.297196	0.040123
TCGA.61.1730.01	cluster9	-0.252214	-0.272684	-0.06538
TCGA.24.1616.01	cluster9	-0.280316	-0.225889	-0.0397476
TCGA.57.1582.01	cluster9	-0.29583	-0.262787	-0.0249149
TCGA.24.1103.01	cluster9	-0.33091	-0.308383	-0.0997726
TCGA.29.1762.01	cluster9	-0.367645	-0.348452	-0.118351
TCGA.13.0802.01	cluster9	-0.417064	-0.241621	-0.0709979
TCGA.13.0920.01	cluster9	-0.441831	-0.25784	-0.0619684
TCGA.24.1430.01	cluster9	-0.421026	-0.271544	-0.077667
TCGA.36.1571.01	cluster9	-0.393134	-0.263398	-0.155732
TCGA.24.2027.01	cluster9	-0.402352	-0.233335	-0.137671
TCGA.61.2088.01	cluster9	-0.376566	-0.231303	-0.141407
TCGA.57.1586.01	cluster9	-0.37863	-0.248923	-0.138507
TCGA.61.2003.01	cluster10	0.315761	0.0252767	0.348175
TCGA.13.0919.01	cluster10	0.30686	0.00381241	0.368727
TCGA.13.0761.01	cluster10	0.304703	-0.018413	0.275945
TCGA.31.1946.01	cluster10	0.27956	-0.041043	0.308186
TCGA.61.1998.01	cluster10	0.246603	0.0738553	0.291788
TCGA.13.0908.01	cluster10	0.239003	0.0324704	0.28642
TCGA.13.0890.01	cluster10	0.257542	-0.0863761	0.419173
TCGA.13.1483.01	cluster10	0.254987	-0.0935656	0.382057
TCGA.23.2649.01	cluster10	0.187144	-0.0341372	0.442776
TCGA.25.2408.01	cluster10	0.138505	-0.0326202	0.39069
TCGA.36.2537.01	cluster10	0.14293	-0.116176	0.28193
TCGA.20.1682.01	cluster10	0.113725	-0.130774	0.294865
TCGA.42.2587.01	cluster10	0.123373	-0.0981213	0.217547
TCGA.25.2404.01	cluster10	0.155757	-0.130825	0.209986
TCGA.09.2053.01	cluster10	0.205186	-0.0812505	0.306989
TCGA.24.1427.01	cluster10	0.161258	-0.0681305	0.309713
TCGA.23.1023.01	cluster10	0.212981	-0.166544	0.327989
TCGA.61.1740.01	cluster10	0.272597	-0.205593	0.248437
TCGA.04.1530.01	cluster10	0.137245	0.153833	0.375351
TCGA.61.1913.01	cluster10	0.153077	0.166542	0.303977
TCGA.24.0975.01	cluster10	0.117116	0.102627	0.228956
TCGA.29.1695.01	cluster10	0.0590533	-0.16995	0.487358
TCGA.13.0900.01	cluster10	0.0417788	-0.177917	0.471356
TCGA.36.2530.01	cluster10	0.0343716	-0.148617	0.495981
TCGA.36.2538.01	cluster10	0.0781341	-0.186334	0.502861
TCGA.25.2398.01	cluster10	0.11525	-0.111702	0.522266
TCGA.61.1737.01	cluster10	0.158339	-0.109216	0.466778
TCGA.13.1408.01	cluster10	0.103455	0.0180235	0.377663
TCGA.24.1546.01	cluster10	0.0746166	0.00638045	0.344698
TCGA.13.1488.01	cluster10	-0.00121029	-0.00168253	0.333691
TCGA.30.1855.01	cluster10	0.0232898	-0.0451932	0.297737
TCGA.24.2254.01	cluster10	0.0286298	-0.130402	0.373182
TCGA.24.2280.01	cluster10	0.0221725	0.110486	0.433699
TCGA.13.2059.01	cluster10	-0.0229672	0.0663865	0.406381
TCGA.23.2078.01	cluster10	-0.0743655	0.0753991	0.510557
TCGA.13.0730.01	cluster10	-0.0571579	-0.0270105	0.444768
TCGA.13.1499.01	cluster10	0.265588	0.118232	0.484547
TCGA.24.1463.01	cluster10	0.26816	0.0916351	0.481025
TCGA.24.1435.01	cluster10	0.304816	0.0967153	0.504808
TCGA.24.2262.01	cluster10	0.296673	0.0993853	0.559976
TCGA.42.2591.01	cluster10	0.265039	-0.0139092	0.541839
TCGA.24.1425.01	cluster10	0.227142	-0.00336852	0.545628
TCGA.13.1494.01	cluster10	0.281778	0.00312973	0.484398
TCGA.57.1585.01	cluster10	0.248064	0.15187	0.447259
TCGA.04.1338.01	cluster10	0.255343	0.111744	0.425329
TCGA.24.2298.01	cluster10	0.194084	0.178577	0.459143
TCGA.30.1857.01	cluster10	0.113883	-0.00597549	0.485159
TCGA.23.2647.01	cluster10	0.0372136	-0.0300667	0.520127
TCGA.25.1628.01	cluster10	0.165905	0.01307	0.605038
TCGA.36.1576.01	cluster10	0.233606	-0.110937	0.694299
TCGA.25.2401.01	cluster10	0.451778	-0.0778699	0.493192
TCGA.13.2071.01	cluster10	0.403059	-0.0380622	0.451139
TCGA.24.1550.01	cluster10	0.41875	-0.0925214	0.423526
TCGA.24.1564.01	cluster10	0.434664	-0.135952	0.417181
TCGA.61.2113.01	cluster10	0.456446	0.013862	0.612237

## Sheet: STable1b
Supplementary Table 1B. ConsensusTME GSVA scores and cluster annotation for IL6/Angiogenesis clusters.
SampleID	Cluster	B_cells	Cytotoxic_cells	Dendritic_cells	Eosinophils	Macrophages	Mast_cells	NK_cells	Neutrophils	T_cells_CD4	T_cells_CD8	T_cells_gamma_delta	T_regulatory_cells	Macrophages_M1	Macrophages_M2	Endothelial	Fibroblasts	Monocytes	Plasma_cells	Immune_Score
TCGA.04.1331.01	cluster1	-0.318109	-0.630101	-0.422767	-0.369794	-0.456424	-0.380428	-0.638167	-0.498406	-0.446433	-0.478417	-0.600785	-0.362881	-0.453793	-0.472818	0.320682	0.255531	-0.461346	-0.348212	-0.4683
TCGA.04.1337.01	cluster1	0.00920675	0.439952	0.259649	-0.0829013	0.0513659	-0.222185	0.231131	-0.0556966	0.162224	0.353679	-0.0105787	-0.00123291	0.12691	0.177775	0.703846	0.521825	0.230315	0.0152751	0.179494
TCGA.04.1362.01	cluster1	-0.347802	-0.649576	-0.464545	-0.263186	-0.255698	-0.438031	-0.375525	-0.286643	-0.383905	-0.417376	-0.463064	-0.533084	-0.320549	-0.133135	-0.378749	-0.767178	0.00696004	0.0486875	-0.286478
TCGA.04.1525.01	cluster1	-0.286915	-0.0252618	-0.398295	-0.393949	-0.328504	-0.27722	-0.143455	-0.525534	-0.260522	-0.302047	-0.119565	-0.360118	-0.363274	-0.501624	-0.0220445	-0.17858	-0.412289	-0.298378	-0.301286
TCGA.04.1648.01	cluster1	0.305652	-0.0191125	-0.0991127	-0.104522	0.0627169	-0.17607	0.0325531	-0.146542	-0.0668756	-0.0670134	-0.164503	-0.19882	0.088146	-0.139155	-0.196859	-0.629542	0.126705	-0.0639485	-0.00265687
TCGA.09.1669.01	cluster1	0.0617305	0.535566	-0.039649	-0.109561	-0.289353	0.00739841	0.421446	-0.320041	0.225973	0.224845	0.289108	0.328389	-0.114012	-0.299906	-0.224587	0.301778	-0.233051	0.0665069	0.0131178
TCGA.10.0926.01	cluster1	-0.493957	-0.465156	-0.503207	-0.448987	-0.492131	-0.438353	-0.53527	-0.350403	-0.553103	-0.497875	-0.518659	-0.44311	-0.550965	-0.571171	0.155761	0.174715	-0.444615	-0.0196319	-0.490319
TCGA.13.0720.01	cluster1	-0.336472	-0.380172	-0.432892	-0.485146	-0.495815	-0.647288	-0.46597	-0.345592	-0.378113	-0.430801	-0.210114	-0.320666	-0.611623	-0.571435	-0.680904	-0.404474	-0.500476	-0.386975	-0.417859
TCGA.13.0725.01	cluster1	0.230851	-0.334304	0.0456985	0.0823367	0.175473	-0.168362	-0.219738	0.331409	-0.0906011	-0.138717	-0.0403448	0.0410296	-0.115485	0.314554	0.490584	0.361174	0.302718	0.21778	0.148758
TCGA.13.0765.01	cluster1	-0.0261354	0.0355659	-0.013537	-0.256028	-0.0171947	0.07433	-0.113658	0.119773	-0.0984742	0.00682208	0.0793829	-0.124825	-0.227065	0.0899429	-0.497506	-0.434062	0.214438	-0.427369	-0.0777528
TCGA.13.0766.01	cluster1	-0.280846	-0.388099	-0.305232	-0.312225	-0.417616	-0.606652	-0.468325	-0.322624	-0.48414	-0.436062	-0.329922	-0.368583	-0.367504	-0.506303	-0.298013	-0.312959	-0.401695	-0.166532	-0.396685
TCGA.13.0797.01	cluster1	-0.160037	0.249367	-0.140286	0.0265051	-0.267202	-0.103365	0.220861	-0.0116309	0.272849	0.0920015	0.213826	0.191716	-0.198716	-0.299136	-0.382595	-0.63877	0.035617	-0.322235	0.0453551
TCGA.13.0905.01	cluster1	-0.156696	-0.580522	-0.525607	-0.200619	-0.414328	-0.446983	-0.427208	-0.433248	-0.278606	-0.348241	-0.436014	-0.152863	-0.354244	-0.487467	-0.418397	-0.534849	-0.564069	0.123204	-0.331397
TCGA.13.0906.01	cluster1	-0.0341701	-0.289929	-0.488083	-0.235395	-0.373916	-0.221622	-0.217529	-0.487723	-0.457137	-0.432	-0.410681	-0.32419	-0.210897	-0.486359	-0.700432	-0.590427	-0.470773	-0.517473	-0.398567
TCGA.13.0910.01	cluster1	0.375965	0.189602	-0.0937822	-0.0919644	-0.260601	-0.145243	0.188636	-0.522765	0.414353	0.420065	0.234543	0.584577	-0.202264	-0.321439	-0.393599	-0.0504442	-0.305674	-0.00112027	0.0900715
TCGA.13.0916.01	cluster1	-0.158489	0.325234	-0.265733	0.00748464	-0.258855	0.0485251	0.217636	-0.43904	0.1429	0.150812	0.15556	0.300672	0.0666798	-0.172414	0.261644	-0.747227	-0.317692	-0.417899	-0.0445268
TCGA.13.1491.01	cluster1	-0.511968	-0.727688	-0.592488	-0.504483	-0.577135	-0.572519	-0.589395	-0.514131	-0.595966	-0.549785	-0.681911	-0.560604	-0.507682	-0.562293	-0.839739	-0.265507	-0.642157	-0.535346	-0.577527
TCGA.13.1495.01	cluster1	-0.370368	-0.302229	-0.419692	-0.303647	-0.407897	-0.666133	-0.302478	-0.552353	-0.40267	-0.48077	-0.387153	-0.494637	-0.36724	-0.628626	-0.494326	-0.130164	-0.482797	0.0778757	-0.383256
TCGA.13.1497.01	cluster1	-0.231386	-0.345462	-0.201831	-0.0633454	-0.176827	-0.0457831	-0.249055	-0.37525	-0.0734777	-0.214082	-0.151469	-0.061039	-0.085254	-0.103639	0.485273	-0.0885626	-0.427517	0.462066	-0.220018
TCGA.13.1500.01	cluster1	-0.0613386	-0.437672	-0.207963	-0.12845	0.027547	-0.221673	-0.195918	-0.482891	0.0458681	-0.181998	-0.0107985	-0.0394358	-0.206982	-0.190565	-0.0636357	0.329762	-0.157242	0.228145	-0.0333238
TCGA.13.1505.01	cluster1	-0.330119	-0.232072	-0.20427	-0.145048	-0.30119	-0.181607	-0.0783916	-0.221381	0.039774	4.9232e-05	-0.141465	0.116248	-0.222182	-0.30812	-0.021571	0.709942	-0.346006	-0.0196588	-0.193015
TCGA.13.1509.01	cluster1	-0.179564	-0.269942	-0.0859432	0.231925	-0.211163	-0.237536	-0.285047	-0.0374345	-0.157755	-0.163928	-0.157204	-0.101112	-0.197974	-0.180639	0.200471	0.562969	-0.144584	0.665247	-0.0673993
TCGA.13.1511.01	cluster1	-0.0642536	-0.395827	-0.24622	0.0779932	-0.0027216	0.107356	-0.464053	0.0467281	-0.4637	-0.412531	-0.431846	-0.449992	0.0439112	0.00480087	0.426622	0.224897	-0.270485	0.482207	-0.167829
TCGA.23.1029.01	cluster1	-0.341724	-0.645449	-0.452204	-0.439897	-0.371921	-0.349836	-0.532787	-0.582552	-0.547782	-0.578911	-0.566121	-0.576198	-0.291145	-0.346709	-0.0120587	-0.347691	-0.56278	-0.458836	-0.436319
TCGA.23.1031.01	cluster1	-0.452581	-0.71111	-0.655327	-0.584542	-0.608381	-0.593966	-0.526072	-0.580634	-0.52692	-0.519168	-0.527719	-0.553246	-0.642462	-0.577055	-0.377777	-0.114495	-0.476832	-0.344401	-0.539726
TCGA.23.1118.01	cluster1	-0.360572	-0.368008	0.228025	0.0866242	0.359532	-0.345559	-0.343695	0.176946	-0.231442	-0.225258	-0.134119	-0.17316	0.31715	0.349505	0.220261	-0.445297	-0.00118416	0.480648	0.0656044
TCGA.23.2081.01	cluster1	-0.593865	-0.57877	-0.540815	-0.613496	-0.514372	-0.560723	-0.553122	-0.542209	-0.591167	-0.584234	-0.620122	-0.67816	-0.559477	-0.638305	0.457503	0.0875121	-0.624502	-0.442537	-0.534335
TCGA.23.2643.01	cluster1	-0.629537	-0.684813	-0.638046	-0.575169	-0.546654	-0.731856	-0.65137	-0.602315	-0.593042	-0.598501	-0.633099	-0.669667	-0.575706	-0.705092	-0.322327	-0.0602287	-0.613345	-0.221057	-0.541596
TCGA.24.0979.01	cluster1	-0.562772	-0.193051	-0.457015	-0.560947	-0.427792	-0.413242	-0.425236	-0.543786	-0.536013	-0.490787	-0.418558	-0.49223	-0.463703	-0.500266	-0.101138	-0.547686	-0.538738	-0.0497667	-0.443833
TCGA.24.0982.01	cluster1	-0.504095	-0.524634	-0.533451	-0.636315	-0.619298	-0.811729	-0.43399	-0.603569	-0.329798	-0.325647	-0.288514	-0.369877	-0.511417	-0.644355	-0.00257603	0.543847	-0.521753	-0.0892598	-0.452914
TCGA.24.1416.01	cluster1	0.00896828	-0.0510511	-0.287899	-0.0505318	-0.271741	0.0363489	-0.181426	-0.313372	-0.320878	-0.287433	-0.300381	-0.381946	-0.386655	-0.259706	-0.65269	-0.554423	-0.281226	0.010964	-0.255016
TCGA.24.1418.01	cluster1	-0.275552	-0.412416	-0.128428	-0.0378908	-0.235436	-0.309641	-0.330407	-0.224683	-0.233053	-0.215704	-0.295178	-0.0850713	-0.251748	-0.316197	-0.011883	0.498194	-0.307273	0.0469102	-0.240756
TCGA.24.1419.01	cluster1	-0.58987	-0.727856	-0.60817	-0.657337	-0.521925	-0.612493	-0.65177	-0.649584	-0.548187	-0.636071	-0.582869	-0.513679	-0.544477	-0.621858	-0.550996	-0.566517	-0.656237	-0.531909	-0.589041
TCGA.24.1423.01	cluster1	-0.310057	-0.396448	-0.225487	-0.291053	-0.079617	0.10745	-0.210429	-0.491222	-0.41193	-0.448964	-0.49243	-0.436386	-0.120009	-0.167402	0.416505	-0.131243	-0.510858	0.0706941	-0.257547
TCGA.24.1424.01	cluster1	-0.135819	-0.54015	-0.235844	0.0788737	-0.195633	-0.33224	-0.40261	0.104854	-0.47509	-0.347438	-0.296663	-0.429851	-0.1614	0.00309924	0.635533	0.075274	-0.27098	-0.640963	-0.283955
TCGA.24.1466.01	cluster1	-0.113236	-0.55224	-0.266614	-0.222697	0.171602	-0.201371	-0.383248	-0.264839	-0.273624	-0.305104	-0.164121	-0.203827	0.00256937	-0.10788	-0.501323	-0.385982	0.0670937	-0.00835704	-0.149558
TCGA.24.1469.01	cluster1	-0.37596	-0.343317	-0.205001	-0.342322	-0.257413	-0.253824	-0.211724	-0.236523	-0.309036	-0.356617	-0.277803	-0.326872	-0.176724	-0.299556	-0.715002	-0.678175	-0.425382	0.0645176	-0.279133
TCGA.24.1474.01	cluster1	0.0475805	-0.589247	0.193365	0.315114	0.248364	0.219863	-0.52946	0.451786	-0.312489	-0.330393	-0.520969	-0.48872	-0.0729227	0.292134	-0.250406	-0.728889	0.400476	-0.104265	-0.011252
TCGA.24.1557.01	cluster1	-0.542754	-0.784845	-0.440618	-0.210483	-0.183806	0.0644768	-0.640666	-0.27306	-0.605461	-0.614753	-0.6261	-0.686844	-0.326209	-0.278382	-0.254686	-0.513203	-0.306278	-0.346754	-0.427962
TCGA.24.1558.01	cluster1	-0.283117	-0.765235	-0.361624	-0.45502	-0.461291	-0.159329	-0.582974	-0.583928	-0.598106	-0.593833	-0.592204	-0.56394	-0.45515	-0.403	-0.744391	-0.541353	-0.460523	-0.494149	-0.507124
TCGA.24.2024.01	cluster1	-0.419405	-0.516038	-0.317854	-0.286836	-0.278773	-0.506928	-0.396943	-0.282334	-0.493853	-0.454012	-0.488156	-0.594136	-0.278117	-0.371716	-0.278996	0.00113631	-0.428133	-0.247861	-0.360745
TCGA.24.2033.01	cluster1	-0.328185	-0.737601	-0.432693	0.329395	-0.303663	-0.27573	-0.561838	-0.119937	-0.515624	-0.456372	-0.452098	-0.549608	-0.397217	-0.284295	0.0411346	0.531311	-0.0930157	-0.221489	-0.381622
TCGA.24.2260.01	cluster1	-0.21959	-0.441751	-0.287883	-0.290902	-0.27971	-0.17686	-0.366192	-0.51508	-0.125782	-0.208221	-0.0820799	-0.00613611	-0.329731	-0.35712	0.481944	0.0601779	-0.277077	-0.305301	-0.256179
TCGA.24.2295.01	cluster1	-0.711445	-0.771561	-0.709632	-0.665351	-0.533082	-0.735292	-0.623289	-0.618801	-0.590567	-0.602715	-0.658722	-0.608496	-0.580087	-0.641947	-0.616445	-0.180449	-0.607841	-0.297049	-0.550495
TCGA.25.1314.01	cluster1	0.0687861	0.0853415	-0.0798182	-0.496679	-0.341833	0.0468633	0.0729739	-0.310676	-0.0616511	0.149402	-0.0741261	-0.0718427	-0.317193	-0.22524	0.359436	0.219969	-0.365599	-0.0130444	-0.185592
TCGA.25.1320.01	cluster1	0.300439	-0.578029	0.246387	0.49615	0.381052	0.559159	-0.0769036	0.408513	-0.294718	-0.201192	-0.249932	-0.344615	0.305388	0.453641	0.0107845	0.783599	0.272304	0.401123	0.157935
TCGA.25.1329.01	cluster1	-0.242582	-0.236736	-0.0743192	0.0574008	0.303875	0.541083	-0.189483	0.237218	-0.312504	-0.142641	-0.263052	-0.355899	0.0257762	0.470386	0.140531	0.542428	0.32677	0.206191	0.0455351
TCGA.25.2393.01	cluster1	-0.223678	-0.422693	-0.252611	0.201162	-0.250152	-0.185063	-0.303323	0.247363	-0.314505	-0.387723	-0.391921	-0.403409	-0.351924	-0.268901	-0.247709	-0.453085	-0.0642822	-0.491254	-0.298008
TCGA.29.1692.01	cluster1	0.500477	0.426311	0.441483	0.591597	0.324728	0.363705	0.490125	0.244367	0.438639	0.416179	0.424787	0.27656	0.275967	0.217487	0.678636	0.44578	0.125584	0.474686	0.373144
TCGA.29.1693.01	cluster1	-0.2385	0.0466179	0.100652	-0.0406551	-0.0797662	0.313326	-0.108902	0.177137	-0.262653	-0.276803	-0.0783023	-0.309138	-0.0388065	0.162969	0.48212	0.340854	-0.154981	0.348399	-0.104708
TCGA.29.1766.01	cluster1	-0.00419715	0.435038	-0.0454047	0.0272708	-0.265018	0.0754466	0.296095	0.0267091	0.146128	0.117736	0.216811	0.103097	-0.152343	-0.0267814	-0.489667	0.7518	-0.250394	0.0447972	-0.00746696
TCGA.29.1769.01	cluster1	0.221191	0.312365	0.140049	0.177789	0.156787	-0.0769911	0.220231	0.397766	0.0985294	-0.0633665	-0.0200476	-0.0867217	0.18543	0.0581965	-0.207441	0.212267	0.362397	-0.279714	0.174
TCGA.29.1784.01	cluster1	0.545409	0.624314	0.624518	0.380418	0.521967	0.753801	0.562877	0.570619	0.640791	0.560235	0.613026	0.682819	0.546692	0.596303	-0.293879	-0.404043	0.53621	0.61593	0.529151
TCGA.29.2434.01	cluster1	-0.151234	-0.442764	-0.27776	0.105937	-0.269992	-0.10473	-0.37942	0.319063	-0.371386	-0.459182	-0.468947	-0.385208	-0.351389	-0.222654	-0.206581	-0.505967	-0.077412	-0.437785	-0.314423
TCGA.30.1862.01	cluster1	0.11192	-0.35022	-0.0186562	0.289052	-0.105469	-0.22837	0.103843	-0.000656788	0.0206127	0.0908849	0.105515	0.176559	0.00667008	-0.279297	0.389753	0.55492	-0.00445625	0.559028	0.0223969
TCGA.36.2534.01	cluster1	-0.531731	-0.0519964	-0.476767	-0.521478	-0.411297	-0.557058	-0.409703	-0.438739	-0.466215	-0.496647	-0.437029	-0.443055	-0.551347	-0.534576	-0.109904	0.223338	-0.455699	-0.0795599	-0.429129
TCGA.36.2540.01	cluster1	-0.262641	0.354318	-0.0964648	-0.295828	-0.12223	-0.179975	-0.0874437	-0.412607	-0.0775784	-0.085017	-0.0906744	-0.0780171	-0.0358593	-0.093895	0.674938	0.0601756	-0.0823856	-0.271704	-0.109592
TCGA.36.2542.01	cluster1	-0.360696	0.0999502	-0.200513	-0.503939	-0.157976	0.0396344	-0.254544	-0.396499	-0.331287	-0.346148	-0.311892	-0.276	-0.170194	-0.330975	-0.141653	-0.468572	-0.417659	-0.228594	-0.372889
TCGA.36.2544.01	cluster1	0.265018	0.687059	0.546276	0.317371	0.53782	0.258848	0.646909	0.388929	0.612513	0.619963	0.712511	0.741796	0.532659	0.535849	-0.493272	-0.471075	0.456762	0.441328	0.488645
TCGA.36.2548.01	cluster1	-0.269735	-0.628474	-0.186038	-0.0979381	0.325381	-0.201662	-0.609797	-0.0186352	-0.422923	-0.439897	-0.531109	-0.467348	0.207163	0.284732	-0.200281	-0.733792	-0.00411833	0.239362	-0.204643
TCGA.57.1992.01	cluster1	-0.30991	-0.803909	-0.549196	-0.367665	-0.484687	-0.575423	-0.642332	-0.462169	-0.605643	-0.637905	-0.695512	-0.705035	-0.453461	-0.432873	0.166066	-0.0640239	-0.445776	-0.410654	-0.492023
TCGA.59.2350.01	cluster1	-0.363372	-0.608413	-0.202274	-0.131111	0.267414	-0.24181	-0.565794	-0.220855	-0.415113	-0.456198	-0.530311	-0.325084	0.177466	0.301876	-0.414656	-0.678069	-0.095325	-0.0024329	-0.236496
TCGA.61.1724.01	cluster1	-0.27175	0.19046	-0.176056	-0.192107	0.0404095	0.0439231	-0.221518	-0.140338	0.0146247	-0.16447	0.0844728	0.0125921	0.0790639	0.00560923	0.0853803	-0.0236907	-0.178788	0.207383	-0.0999636
TCGA.61.1736.01	cluster1	0.218404	0.175253	0.296783	0.509402	0.280948	-0.0342112	0.0685752	0.452134	0.163331	0.105693	-0.0283689	0.0280533	0.122327	0.15309	0.603311	-0.211366	0.525704	0.217185	0.253346
TCGA.61.1741.01	cluster1	-0.00780748	-0.40661	0.039709	-0.164527	-0.175575	-0.0216867	-0.298145	-0.289001	-0.0835605	-0.217826	-0.0941087	0.0435937	-0.0401315	-0.12422	-0.130381	-0.576046	-0.197098	0.189825	-0.143867
TCGA.61.1899.01	cluster1	-0.110999	-0.512133	-0.261318	-0.0789479	-0.135273	-0.330928	-0.503851	-0.0631208	-0.414252	-0.45037	-0.413346	-0.394589	-0.28658	-0.188527	0.259284	-0.286325	0.0856667	-0.556915	-0.306295
TCGA.61.1914.01	cluster1	0.310415	-0.0854246	0.336476	0.453748	0.373892	0.0798384	0.0282077	0.332994	-0.13022	-0.144467	0.0258063	-0.208701	0.339195	0.405108	0.173591	-0.238528	0.209651	0.477628	0.200113
TCGA.61.1916.01	cluster1	-0.609859	-0.541359	-0.446199	-0.496328	-0.347889	-0.536267	-0.590497	-0.46701	-0.390296	-0.48337	-0.521361	-0.439453	-0.316189	-0.375995	-0.320891	-0.397474	-0.448259	-0.446969	-0.4357
TCGA.61.1916.02	cluster1	-0.179248	0.354799	0.013169	-0.117658	-0.01144	-0.074865	-0.0276837	-0.402948	0.0110974	-0.0414851	0.0252421	0.0212094	-0.0101711	-0.0510576	0.693464	-0.0435483	-0.0972156	-0.45232	-0.0682088
TCGA.61.2008.01	cluster1	-0.282334	-0.400458	0.0381919	0.0147071	0.0465668	-0.12828	-0.33049	-0.0680571	-0.255922	-0.315829	-0.304396	-0.354283	0.0194304	0.123627	-0.207436	-0.0115114	0.0386528	-0.174958	-0.168723
TCGA.61.2009.01	cluster1	0.253221	0.373172	0.390828	0.330345	0.235536	0.299142	0.160169	0.319214	0.271316	0.180934	0.0868624	0.165087	0.334193	0.391124	0.46209	0.633904	0.329403	0.46134	0.281431
TCGA.61.2109.01	cluster1	0.205806	-0.131982	-0.22759	0.185057	-0.0084363	-0.0834703	-0.236422	-0.289506	0.00704979	-0.222787	-0.275686	-0.227063	-0.226388	0.0865013	-0.675857	-0.479986	0.0565576	-0.341383	-0.0965304
TCGA.61.2610.02	cluster1	0.392783	0.388582	0.400525	0.52662	0.301551	0.472722	0.410089	0.161052	0.382404	0.391194	0.339882	0.229516	0.273552	0.214726	0.691087	0.554572	0.0113094	0.292131	0.320949
TCGA.61.2612.01	cluster1	-0.0550105	-0.675954	-0.26259	-0.173056	0.0272277	-0.129183	-0.569813	0.205579	-0.451024	-0.425856	-0.499452	-0.410551	-0.29724	-0.0522508	-0.0634621	-0.563618	0.136412	-0.226343	-0.211888
TCGA.04.1338.01	cluster10	0.340077	0.740299	0.502502	0.648069	0.481815	0.578018	0.663487	0.540052	0.578862	0.643476	0.685532	0.645669	0.524263	0.490403	0.582889	0.544038	0.508348	0.511925	0.537291
TCGA.04.1530.01	cluster10	0.337116	0.366077	0.464209	0.355339	0.483604	-0.118458	0.454747	0.43848	0.338083	0.401239	0.494671	0.449561	0.502983	0.500522	-0.0672816	0.585917	0.449758	0.38112	0.397402
TCGA.09.2053.01	cluster10	0.320678	0.620062	0.266994	0.107829	0.225588	-0.0599663	0.329423	-0.190518	0.355054	0.340715	0.464418	0.279155	0.384955	0.119735	-0.424661	-0.26313	0.208888	0.259834	0.269028
TCGA.13.0730.01	cluster10	0.0564049	0.165293	-0.155954	-0.392331	-0.352978	-0.115617	-0.303041	-0.0686299	-0.394764	-0.388494	-0.308551	-0.544363	-0.341391	-0.291044	0.472354	0.397619	-0.216355	-0.470417	-0.325402
TCGA.13.0761.01	cluster10	0.0718684	0.68876	0.393996	0.478474	0.425444	0.438651	0.476723	0.479568	0.18517	0.351044	0.390482	0.0868743	0.377174	0.494966	0.432853	-0.444846	0.437465	-0.0575124	0.35558
TCGA.13.0890.01	cluster10	0.436329	0.0653149	0.419206	0.484782	0.457942	0.489777	0.148241	0.358567	0.261846	0.215598	0.272163	0.292178	0.447525	0.503569	0.565622	0.641062	0.272504	0.413151	0.360266
TCGA.13.0900.01	cluster10	-0.0134958	-0.010221	0.407292	0.407729	0.354227	0.1848	-0.158126	-0.0525506	0.148093	0.126625	0.159254	0.213748	0.358329	0.291026	0.458939	0.699	0.0541181	0.565419	0.217112
TCGA.13.0908.01	cluster10	0.39946	-0.286115	0.535782	0.418397	0.549993	0.771001	0.297639	0.491142	0.443838	0.444223	0.355987	0.406093	0.565036	0.519311	0.741643	0.632731	0.501939	0.42602	0.502895
TCGA.13.0919.01	cluster10	0.292761	-0.678906	0.398914	0.46252	0.590531	0.661912	-0.456249	0.304542	-0.116544	-0.130062	-0.270021	0.0151271	0.615942	0.614389	0.50023	0.680572	0.474678	0.511489	0.332713
TCGA.13.1408.01	cluster10	-0.329752	-0.205695	-0.145577	0.112458	-0.345833	-0.0917324	0.0863149	-0.347032	-0.104762	0.042041	-0.0179291	0.0214677	-0.0223101	-0.159178	0.58384	0.711994	-0.240658	0.202869	-0.0793942
TCGA.13.1483.01	cluster10	-0.214094	-0.572175	0.0475618	0.044251	0.195827	0.215289	-0.37296	-0.226952	-0.365835	-0.347827	-0.490952	-0.356453	0.158477	0.116843	0.543598	0.452156	-0.24376	0.27681	-0.137735
TCGA.13.1488.01	cluster10	-0.105095	0.501496	0.0272194	-0.300695	-0.124632	0.263976	0.280028	-0.523857	0.263939	0.125626	0.276803	0.1628	0.0392551	-0.292951	-0.450334	-0.0866186	-0.472211	0.287827	-0.0125346
TCGA.13.1494.01	cluster10	-0.148065	-0.130214	0.0735941	0.0674096	0.0667624	0.165504	-0.069925	-0.130687	-0.124415	-0.152971	-0.2048	-0.124927	0.147742	-0.148112	0.730904	0.727216	-0.344221	0.260336	-0.0519788
TCGA.13.1499.01	cluster10	0.643037	0.777725	0.552054	0.680913	0.321998	0.533802	0.729363	0.21274	0.790342	0.714024	0.699114	0.831991	0.389249	0.46836	0.672671	0.624652	0.474331	0.52584	0.570262
TCGA.13.2059.01	cluster10	0.127568	-0.440183	0.104679	0.365894	-0.0153576	-0.655436	-0.474649	0.00705448	-0.171765	-0.0840288	-0.413077	-0.0112235	-0.0481632	-0.064595	0.834131	0.719339	0.116538	-0.20571	-0.101827
TCGA.13.2071.01	cluster10	0.384422	-0.68095	0.588802	0.707441	0.637754	0.585731	-0.333846	0.671956	-0.0188856	0.0140585	-0.197426	0.15314	0.566971	0.599691	0.390268	-0.386761	0.614199	0.467753	0.41179
TCGA.20.1682.01	cluster10	0.455851	0.642085	0.425914	0.543898	0.186029	0.0877441	0.37642	0.482015	0.51322	0.506633	0.401726	0.48794	0.200767	0.23589	0.558141	0.571879	0.281164	0.516721	0.377031
TCGA.23.1023.01	cluster10	-0.0657311	0.202814	0.0789597	0.261374	-0.0254703	-0.00545517	0.0469002	0.406668	0.0546948	0.172837	0.0943377	0.161273	-0.131995	0.0555508	0.836748	0.55977	-0.0568941	0.548095	0.103288
TCGA.23.2078.01	cluster10	0.602035	0.629068	0.458943	0.472268	0.318797	0.464997	0.609303	0.0992432	0.675332	0.684922	0.570964	0.754401	0.437007	0.185142	0.546177	0.547147	0.317105	0.651566	0.468926
TCGA.23.2647.01	cluster10	-0.356597	-0.521117	-0.318435	-0.00267576	-0.195379	-0.0907354	-0.480289	-0.15937	-0.411609	-0.48482	-0.396336	-0.477527	-0.277192	-0.381375	0.255004	0.54771	-0.221318	-0.289145	-0.27759
TCGA.23.2649.01	cluster10	0.234105	0.534179	0.368092	0.285517	-0.0368298	0.212299	0.43173	0.0391068	0.321327	0.31547	0.452469	0.278299	0.259344	-0.00467399	0.456869	-0.0625427	0.0850642	0.631218	0.306473
TCGA.24.0975.01	cluster10	-0.0816632	0.565346	-0.0206955	-0.0120844	-0.0162616	-0.00955546	0.364623	-0.115125	0.0558487	0.299904	0.238707	0.0689823	0.0527747	-0.127662	0.637643	0.575123	-0.0290212	0.273172	0.090325
TCGA.24.1425.01	cluster10	0.482441	0.481576	0.539314	0.608187	0.468501	0.597673	0.359221	0.554708	0.484165	0.485153	0.402082	0.475414	0.408327	0.591283	0.936095	0.766416	0.564965	0.372417	0.493671
TCGA.24.1427.01	cluster10	0.497557	0.151612	0.495594	0.544752	0.413042	0.528664	0.246651	0.436879	0.476627	0.496723	0.335482	0.5214	0.368484	0.502494	0.509359	0.772504	0.434833	0.554438	0.470422
TCGA.24.1435.01	cluster10	0.0618973	0.11185	0.335471	0.356866	0.442306	0.232598	0.261729	0.132035	-0.043052	0.184646	-0.110875	0.137454	0.464007	0.579523	0.4993	0.524251	0.0488484	0.533451	0.270262
TCGA.24.1463.01	cluster10	0.116237	-0.0140435	0.377207	0.19776	0.373176	0.549822	0.135159	0.396766	-0.148334	0.0165354	-0.251739	-0.268948	0.420697	0.426528	0.37447	0.439706	0.168311	0.390424	0.241492
TCGA.24.1546.01	cluster10	0.215941	-0.549667	0.303444	0.602754	0.438818	0.397793	-0.318248	0.522691	-0.251582	-0.172466	-0.262275	-0.334584	0.204246	0.52508	0.0352317	0.77745	0.482468	0.176218	0.237605
TCGA.24.1550.01	cluster10	0.157236	0.252725	0.533026	0.608523	0.558273	0.634005	0.344885	0.502658	0.382019	0.309211	0.336568	0.157896	0.510573	0.561069	0.777904	0.582037	0.483919	0.368879	0.436349
TCGA.24.1564.01	cluster10	0.536834	0.303635	0.686644	0.675155	0.733174	0.805572	0.578854	0.804416	0.562643	0.618115	0.602124	0.413507	0.7312	0.858843	0.40117	-0.00189776	0.789662	0.514651	0.663482
TCGA.24.2254.01	cluster10	-0.0408787	-0.767867	0.122238	0.46741	0.456733	0.144493	-0.436452	0.405223	-0.42215	-0.439284	-0.578651	-0.511543	0.128805	0.564167	0.393572	0.0968532	0.547615	-0.540446	-0.0708385
TCGA.24.2262.01	cluster10	0.365289	0.502698	0.480608	0.380565	0.406003	0.536901	0.381393	0.439499	0.370785	0.377447	0.357536	0.36456	0.318708	0.459195	0.796887	0.604575	0.517119	0.291052	0.393
TCGA.24.2280.01	cluster10	0.0302703	-0.307037	0.179296	0.237306	-0.0996818	-0.464377	-0.364156	0.17381	-0.00811196	-0.0914663	-0.325364	-0.0398538	-0.0920903	-0.0926484	0.86506	0.765748	0.21078	-0.223262	-0.0810996
TCGA.24.2298.01	cluster10	-0.291241	-0.320728	-0.258035	-0.0255921	-0.185594	0.0151226	-0.208448	-0.0109174	-0.293297	-0.28061	-0.1756	-0.321284	-0.175682	-0.343824	0.3038	0.677073	-0.201271	0.0133229	-0.193418
TCGA.25.1628.01	cluster10	0.477714	0.72991	0.543227	0.671159	0.53366	0.654865	0.675525	0.433721	0.627082	0.620254	0.67134	0.632219	0.584402	0.635204	0.0451619	0.761142	0.492479	0.589346	0.555895
TCGA.25.2398.01	cluster10	-0.112816	-0.451765	0.279571	0.317094	0.269189	0.148417	-0.162157	0.0440401	-0.335734	-0.196674	-0.30568	-0.468312	0.292473	0.178728	0.297631	0.571487	0.204878	-0.189534	-0.0187066
TCGA.25.2401.01	cluster10	0.728127	0.429705	0.720351	0.778387	0.73234	0.683008	0.639774	0.736329	0.591247	0.602694	0.580141	0.668048	0.732138	0.75954	0.86567	0.606554	0.789794	0.586717	0.650336
TCGA.25.2404.01	cluster10	0.169768	-0.0966428	0.0214976	0.275495	0.227551	0.196374	-0.107062	0.291125	-0.264836	-0.210167	-0.231961	-0.398323	0.180106	0.131828	0.500414	0.601627	0.158691	0.142291	0.076945
TCGA.25.2408.01	cluster10	0.145422	-0.0924698	0.35377	0.531077	0.395319	0.00180874	-0.0388995	0.557261	-0.10231	0.0763189	-0.0328129	-0.133086	0.254364	0.521781	0.315612	0.798188	0.493894	-0.253316	0.233919
TCGA.29.1695.01	cluster10	0.391172	0.456728	0.579476	0.644999	0.60254	0.606301	0.219463	0.628297	0.326496	0.272647	0.401015	0.256663	0.627885	0.651551	0.550989	0.330605	0.582606	-0.102445	0.418982
TCGA.30.1855.01	cluster10	0.503458	0.450058	0.488613	0.173256	0.429334	0.408167	0.495135	0.448422	0.440784	0.465732	0.495432	0.52362	0.543023	0.569541	0.163838	0.31742	0.514155	-0.0618894	0.44455
TCGA.30.1857.01	cluster10	0.235126	0.487257	0.325938	0.0150602	0.35256	0.588155	0.4658	0.138832	0.454729	0.454486	0.304502	0.497429	0.380774	0.379408	0.573008	0.625377	0.436545	-0.129953	0.403903
TCGA.31.1946.01	cluster10	0.362524	0.484955	0.590439	0.68665	0.649238	0.834067	0.42728	0.53439	0.441653	0.40528	0.481422	0.524796	0.608129	0.709141	0.667508	0.629981	0.49008	0.705172	0.511645
TCGA.36.1576.01	cluster10	0.549928	0.666472	0.643294	0.685036	0.570352	0.521682	0.644312	0.617166	0.643068	0.666831	0.639471	0.598647	0.616502	0.662475	0.576109	0.808431	0.608738	0.641309	0.593349
TCGA.36.2530.01	cluster10	-0.102363	-0.684775	0.123371	0.162042	0.21704	0.386938	-0.298892	0.0751124	-0.378779	-0.30593	-0.410582	-0.476252	0.220589	0.23398	0.334971	0.570817	0.039979	-0.304779	-0.106125
TCGA.36.2537.01	cluster10	0.135305	0.112334	-0.0940775	0.188608	0.220435	0.237604	-0.0818431	0.233366	-0.265643	-0.10166	-0.159744	-0.342693	0.213119	0.217957	0.182603	0.452647	0.144188	0.32998	0.104677
TCGA.36.2538.01	cluster10	0.15421	-0.0175986	0.297811	0.505022	0.354624	0.0459291	0.0497763	0.553274	-0.0707913	0.0489177	-0.0851904	-0.287471	0.173572	0.510008	0.394747	0.806619	0.453627	-0.216857	0.20124
TCGA.42.2587.01	cluster10	-0.26182	-0.790095	-0.455243	-0.514961	-0.449587	-0.486446	-0.586498	-0.582318	-0.631471	-0.621979	-0.688945	-0.621016	-0.402764	-0.331911	-0.596401	-0.44538	-0.537912	-0.270401	-0.51982
TCGA.42.2591.01	cluster10	0.112512	0.551699	0.416614	0.382743	0.340809	0.277848	0.280003	0.491735	0.331825	0.369898	0.313889	0.394285	0.259334	0.470787	0.800734	0.504138	0.492348	0.418435	0.367038
TCGA.57.1585.01	cluster10	0.335911	-0.00565066	0.412395	0.406238	0.245318	0.503429	0.133093	0.298793	0.311227	0.218394	0.0633499	0.242118	0.252433	0.251139	0.295804	0.807615	0.331693	0.141364	0.30631
TCGA.61.1737.01	cluster10	0.296096	-0.325785	0.281231	0.349661	0.34669	0.346878	-0.0680246	0.259906	-0.280971	-0.203789	-0.29057	-0.0898886	0.276819	0.366802	0.566079	0.674651	0.10334	0.10866	0.130615
TCGA.61.1740.01	cluster10	0.530064	0.704172	0.59104	0.638927	0.574457	0.719684	0.623129	0.499493	0.67352	0.628994	0.651518	0.670412	0.61829	0.522649	0.467266	-0.229118	0.552439	0.57526	0.583291
TCGA.61.1913.01	cluster10	0.292377	0.651072	0.422725	0.26298	0.18354	0.431159	0.576618	0.386626	0.513537	0.49927	0.544437	0.610322	0.260622	0.227096	-0.346938	-0.473474	0.0657994	0.391963	0.343053
TCGA.61.1998.01	cluster10	0.0883689	-0.0550774	0.489042	0.558763	0.574876	0.207885	-0.196536	0.642773	-0.0842557	-0.0255253	0.0740907	-0.121249	0.42364	0.689836	0.660487	0.543882	0.544867	-0.217953	0.304152
TCGA.61.2003.01	cluster10	0.573648	0.617073	0.643135	0.702015	0.638336	0.629188	0.63007	0.502209	0.519852	0.601164	0.523829	0.375963	0.624142	0.69686	0.653623	0.624295	0.661928	-0.117617	0.571416
TCGA.61.2113.01	cluster10	0.319399	0.306544	0.496336	0.590857	0.522288	0.561113	0.526071	0.471293	0.379214	0.437772	0.528215	0.439972	0.489793	0.43957	0.715357	0.559751	0.501136	0.243627	0.466623
TCGA.04.1335.01	cluster2	-0.302077	-0.147748	-0.311011	-0.340646	-0.407821	-0.403451	-0.205751	-0.387097	-0.259129	-0.1943	-0.0398963	-0.112933	-0.399896	-0.346211	-0.169956	0.260909	-0.335011	0.00424489	-0.25759
TCGA.04.1342.01	cluster2	-0.47856	-0.106864	-0.345473	-0.538088	-0.395047	-0.54793	-0.258283	-0.548206	-0.302174	-0.347254	-0.249135	-0.394544	-0.367354	-0.435624	0.520618	0.334207	-0.468569	-0.37893	-0.36357
TCGA.04.1349.01	cluster2	0.322772	0.776139	0.211137	0.166563	0.178186	0.400487	0.688518	0.235545	0.529371	0.579614	0.654529	0.570335	0.18958	0.329861	0.278609	0.111379	0.439316	0.350404	0.405085
TCGA.04.1360.01	cluster2	-0.408185	0.0855908	-0.282113	-0.366806	-0.362666	-0.107437	-0.180651	-0.284813	-0.126461	-0.257085	-0.365962	0.0724433	-0.236334	-0.152886	0.199273	0.104026	-0.35174	-0.0154518	-0.281742
TCGA.04.1652.01	cluster2	0.0250876	0.00756191	-0.16479	-0.356873	-0.320641	-0.179005	-0.0628224	-0.301008	0.0706874	0.0480899	-0.0271927	0.0774349	-0.244971	-0.172509	-0.0462024	0.271817	-0.017016	-0.112383	-0.0876139
TCGA.09.1661.01	cluster2	0.0664238	-0.247862	-0.200235	-0.123337	-0.291813	-0.382551	-0.282243	-0.398784	-0.130502	-0.264612	-0.296003	-0.178301	-0.260209	-0.256923	0.529836	0.334073	-0.212331	-0.383505	-0.22728
TCGA.09.1665.01	cluster2	0.00968863	0.0384743	-0.0466752	0.148062	-0.20795	0.177413	0.094192	-0.04266	0.236836	0.030852	0.139404	-0.0100194	-0.184937	-0.173618	0.269468	0.107555	-0.320515	0.0194481	-0.0474953
TCGA.10.0935.01	cluster2	-0.362235	-0.0376011	-0.538207	-0.543876	-0.511883	-0.524077	-0.315267	-0.558969	-0.382839	-0.357792	-0.355691	-0.178231	-0.492726	-0.551467	-0.185724	-0.0661526	-0.481299	-0.249807	-0.444224
TCGA.13.0714.01	cluster2	0.138831	0.508102	-0.00262367	-0.257657	-0.220992	-0.200045	0.208229	-0.233662	0.32259	0.352647	0.307382	0.231992	-0.286539	-0.146062	0.43131	0.474805	0.091713	-0.0914229	0.0842502
TCGA.13.0726.01	cluster2	-0.451049	0.496386	-0.342603	-0.405197	-0.272568	-0.284318	0.110799	-0.333436	-0.0213271	0.103853	0.188089	0.0736952	-0.349828	-0.342346	-0.685034	-0.398753	-0.269498	-0.189467	-0.202623
TCGA.13.0757.01	cluster2	-0.523266	-0.0549277	-0.153963	-0.146377	-0.281943	-0.422492	-0.353128	0.13454	-0.326043	-0.322072	-0.207597	-0.289904	-0.292189	-0.346396	-0.598225	0.300912	-0.225107	-0.0974222	-0.295355
TCGA.13.0762.01	cluster2	0.0395846	0.0992189	-0.31371	-0.480407	-0.412836	-0.385088	-0.112585	-0.4334	-0.181764	-0.139749	-0.113098	-0.0740049	-0.32689	-0.324854	-0.386763	0.0718976	-0.323945	-0.536417	-0.319576
TCGA.13.0791.01	cluster2	-0.0259459	0.618664	-0.113635	-0.217576	-0.233508	-0.00433769	0.422891	0.111901	0.341557	0.361397	0.479619	0.464231	-0.151354	-0.114691	-0.430759	0.434513	-0.0733767	-0.136303	0.118541
TCGA.13.0793.01	cluster2	0.288451	0.638275	0.169578	0.259145	0.207192	-0.340968	0.53908	0.168673	0.390121	0.459179	0.507413	0.396279	0.204955	0.140867	0.562433	0.547013	0.328012	0.0630418	0.298942
TCGA.13.0807.01	cluster2	-0.256606	0.325447	-0.303527	-0.347219	-0.301876	-0.0950795	-0.0286396	-0.208384	0.0299292	-0.0903415	-0.0815928	0.10366	-0.332077	-0.480315	0.080333	0.543316	-0.421874	0.136828	-0.241023
TCGA.13.0883.01	cluster2	0.145547	-0.264047	0.183951	0.0183028	0.232463	0.305717	-0.0629889	0.189807	-0.0340389	-0.0526074	-0.0492761	0.0941249	0.154772	0.0596219	-0.356466	-0.0539775	0.353483	-0.263594	0.110578
TCGA.13.0894.01	cluster2	0.171809	0.320299	0.195146	0.15402	0.261293	0.334718	0.363195	-0.0806936	0.369005	0.429942	0.383964	0.445409	0.269302	0.274498	0.460111	0.714072	0.410346	0.281041	0.306893
TCGA.13.0901.01	cluster2	-0.274291	-0.555195	-0.176315	-0.204294	-0.00595872	-0.139593	-0.383847	0.112624	-0.276272	-0.299973	-0.499773	-0.183295	-0.0700355	-0.168503	0.55808	0.535213	-0.193439	-0.157181	-0.259001
TCGA.13.0903.01	cluster2	0.0128307	0.299983	-0.337413	-0.327014	-0.330938	-0.267394	-0.0608103	-0.477364	-0.212452	-0.119955	-0.190776	-0.0484925	-0.248198	-0.408585	0.044125	-0.145208	-0.367494	-0.0344124	-0.230154
TCGA.13.0912.01	cluster2	-0.176664	-0.450645	-0.549472	-0.462174	-0.514069	-0.471081	-0.35762	-0.459795	-0.49036	-0.476993	-0.595998	-0.411435	-0.545511	-0.649572	-0.750813	-0.70535	-0.455418	-0.502854	-0.47139
TCGA.13.1403.01	cluster2	-0.323848	-0.478301	-0.460304	-0.499033	-0.395632	-0.593004	-0.453282	-0.490377	-0.368129	-0.32575	-0.356376	-0.346399	-0.312334	-0.504358	0.263083	-0.0120318	-0.47704	0.257922	-0.343229
TCGA.13.1404.01	cluster2	-0.249287	-0.0611329	-0.116529	-0.0623203	-0.213515	-0.0124636	-0.0749225	-0.242933	0.0169858	-0.0246582	-0.0319229	0.288661	-0.129938	-0.0999806	0.467886	0.475366	-0.171359	0.0463227	-0.160449
TCGA.13.1412.01	cluster2	-0.00924803	0.00689712	-0.0572398	-0.189662	-0.0985859	-0.318014	-0.167214	-0.38263	0.166524	0.0830517	-0.0243131	0.286906	-0.0471407	-0.149157	-0.43347	0.331052	0.0474861	-0.128464	-0.0281043
TCGA.13.1482.01	cluster2	-0.160471	0.271873	-0.335625	0.0345028	-0.268811	-0.266051	0.265684	-0.170924	-0.159547	0.0671795	0.0732722	-0.111374	-0.363525	-0.441822	-0.121424	0.264147	-0.375452	0.296211	-0.205481
TCGA.13.1510.01	cluster2	-0.432009	-0.0467841	-0.373484	-0.513589	-0.485654	-0.578729	-0.0593292	-0.428858	-0.219931	-0.272407	-0.101404	0.0931962	-0.533951	-0.600177	-0.475219	-0.21713	-0.489896	-0.332513	-0.372187
TCGA.23.1109.01	cluster2	-0.0378748	-0.233256	0.220879	-0.24712	0.00430299	0.296136	-0.346792	-0.332635	-0.0766062	-0.125477	-0.204807	-0.223228	0.0590606	0.299095	0.40419	0.358047	-0.034179	-0.584604	-0.112113
TCGA.23.1117.01	cluster2	0.260031	0.532602	0.406732	0.361689	0.294071	0.46545	0.403287	0.299847	0.491258	0.467263	0.454418	0.521057	0.380905	0.411754	0.67625	0.762562	0.427847	0.0152355	0.400593
TCGA.25.1318.01	cluster2	0.180832	-0.58185	0.0570612	0.31279	0.244599	0.561509	-0.333555	0.490891	-0.0156223	-0.14611	-0.255343	0.241558	0.167898	0.42134	-0.454605	0.472828	0.388484	0.0313231	0.127205
TCGA.25.1627.01	cluster2	-0.248264	-0.615633	-0.467102	0.00741428	-0.398408	-0.413866	-0.58305	-0.377185	-0.492604	-0.52689	-0.562829	-0.557336	-0.504323	-0.34998	-0.633102	-0.159288	-0.387443	-0.181362	-0.419384
TCGA.25.1632.01	cluster2	-0.679059	-0.695487	-0.564068	-0.706278	-0.576282	-0.62851	-0.566788	-0.589142	-0.608575	-0.555426	-0.606589	-0.575904	-0.596333	-0.629352	-0.528689	-0.456797	-0.60794	-0.38999	-0.574447
TCGA.25.1877.01	cluster2	-0.0702703	0.209952	0.0117327	-0.101259	-0.269499	-0.0470295	0.123031	0.287188	0.180625	0.0485824	0.080541	0.191635	-0.220103	-0.0117336	-0.226617	0.409928	-0.20944	-0.258285	-0.0420919
TCGA.25.2397.01	cluster2	-0.0724809	-0.496842	-0.202499	-0.257484	0.0657975	-0.143995	-0.375921	0.133648	-0.352446	-0.281418	-0.405702	-0.48372	-0.277599	-0.107651	-0.27177	-0.341123	0.189719	-0.226115	-0.176972
TCGA.29.1703.01	cluster2	-0.327165	8.30979e-05	-0.372997	-0.319574	-0.391147	-0.302478	-0.338841	-0.315857	-0.374262	-0.413301	-0.335546	-0.359818	-0.448979	-0.480976	-0.620225	-0.170192	-0.408421	-0.087601	-0.388947
TCGA.29.2425.01	cluster2	-0.461158	0.341368	-0.26573	-0.428833	-0.190926	-0.0295921	-0.143305	-0.384206	-0.242863	-0.286696	-0.299929	-0.0696922	-0.160236	-0.39655	-0.193822	0.113872	-0.343698	-0.32811	-0.33586
TCGA.30.1859.01	cluster2	-0.208776	-0.0708077	-0.0620024	-0.150319	-0.309797	-0.139344	-0.0129961	-0.256499	-0.0564392	-0.0521244	0.0388843	-0.116254	-0.393214	-0.313273	-0.54583	0.295238	-0.146063	-0.586797	-0.246439
TCGA.30.1892.01	cluster2	0.0164657	-0.0240984	-0.0411918	-0.0508399	-0.160142	0.292756	0.220088	0.240667	0.0905949	0.1022	0.184258	-0.0233587	-0.235668	-0.136973	0.64976	0.747125	0.0151601	0.178513	0.00732099
TCGA.57.1583.01	cluster2	-0.596215	-0.522145	-0.610241	-0.599256	-0.544584	-0.545987	-0.4648	-0.532654	-0.507135	-0.513652	-0.505063	-0.499551	-0.488884	-0.579614	-0.108775	0.185187	-0.578574	-0.537762	-0.535164
TCGA.61.1728.01	cluster2	-0.175493	-0.445217	-0.196583	-0.45142	-0.00805452	0.00318662	-0.331113	0.0123152	-0.257177	-0.250803	-0.0991227	-0.137186	-0.226945	0.0393511	-0.268275	0.242374	-0.219245	-0.401704	-0.275001
TCGA.61.1734.01	cluster2	-0.232651	0.0224364	-0.0821202	-0.288635	-0.0493526	-0.167384	-0.0490388	0.0551865	-0.0939912	-0.0480437	0.0854432	0.0132247	0.0077733	-0.273456	-0.624594	-0.396473	-0.19675	-0.525762	-0.183499
TCGA.61.2102.01	cluster2	-0.352347	-0.531703	-0.152925	-0.197775	-0.0795999	0.0111348	-0.470296	0.148584	-0.422724	-0.479276	-0.356477	-0.437999	-0.20456	-0.136588	0.708595	0.531188	0.0587048	-0.316984	-0.243241
TCGA.04.1361.01	cluster3	-0.115708	-0.0248463	-0.18646	0.289051	-0.0678507	-0.160792	0.0444018	-0.276619	0.074235	-0.0467273	-0.0394671	0.0322983	-0.0788376	0.100646	0.1959	-0.0631382	-0.0290676	0.0571034	0.0498332
TCGA.04.1519.01	cluster3	-0.623487	-0.658632	-0.696655	-0.600944	-0.702191	-0.81033	-0.678959	-0.660642	-0.57843	-0.607609	-0.584649	-0.672247	-0.710782	-0.736478	-0.67648	-0.372872	-0.669962	-0.601194	-0.631893
TCGA.04.1536.01	cluster3	-0.178327	-0.637905	-0.321587	-0.14566	-0.19833	-0.315065	-0.442285	-0.226368	-0.307974	-0.383611	-0.546978	-0.328037	-0.376956	-0.397662	-0.268193	-0.256128	-0.0989401	-0.136044	-0.267871
TCGA.04.1638.01	cluster3	-0.193381	0.310528	-0.461594	-0.52344	-0.547745	-0.617233	-0.12074	-0.520062	-0.193171	-0.239209	0.0189842	-0.10073	-0.507813	-0.535506	-0.502156	-0.2713	-0.557032	-0.338261	-0.383618
TCGA.04.1649.01	cluster3	-0.0727024	-0.402426	-0.318226	-0.44269	-0.255528	-0.53827	-0.352015	-0.413617	-0.23578	-0.142101	-0.277063	-0.0547937	-0.272233	-0.497318	-0.431169	-0.213617	0.0016174	-0.132893	-0.22561
TCGA.04.1655.01	cluster3	-0.367069	-0.256415	-0.497574	-0.58582	-0.564651	-0.622611	-0.401226	-0.534416	-0.388616	-0.467398	-0.366717	-0.482843	-0.573641	-0.597702	-0.645021	0.0518169	-0.458261	-0.349046	-0.467821
TCGA.09.1670.01	cluster3	-0.0239492	-0.369057	0.119115	0.283282	0.0841513	-0.364937	-0.302914	0.456357	-0.151589	-0.100127	-0.0889004	-0.0906054	0.0926528	0.102691	-0.510113	-0.644633	0.415109	-0.0417586	0.139184
TCGA.09.1672.01	cluster3	-0.00991141	0.0559249	-0.0626887	-0.206009	0.145643	-0.301907	0.0306534	-0.0165278	0.0480808	0.0752611	0.0891522	0.135276	-0.136248	0.124753	0.0135271	-0.0886085	0.124184	-0.221923	0.0469638
TCGA.09.1675.01	cluster3	-0.401727	-0.448157	-0.486657	-0.375586	-0.534182	-0.518388	-0.452725	-0.561212	-0.373933	-0.445167	-0.28273	-0.272948	-0.506857	-0.582335	-0.39883	-0.61649	-0.572264	-0.540882	-0.52074
TCGA.09.2049.01	cluster3	-0.608386	-0.391618	-0.648446	-0.682128	-0.736234	-0.848075	-0.549706	-0.578754	-0.547191	-0.555717	-0.522488	-0.540847	-0.712218	-0.744261	-0.210141	0.0324973	-0.681474	-0.627686	-0.615852
TCGA.09.2055.01	cluster3	0.224824	0.0811801	0.0188862	0.0137728	-0.0893207	-0.00290228	0.0162257	-0.0515515	-0.185619	-0.180891	-0.0654335	0.0831359	-0.139606	-0.145478	0.127016	-0.331917	-0.343567	0.613948	-0.132273
TCGA.10.0925.01	cluster3	-0.4886	-0.396248	-0.504149	-0.499245	-0.489971	-0.659148	-0.470764	-0.328988	-0.44754	-0.476895	-0.435538	-0.324506	-0.56135	-0.593717	-0.385339	-0.50256	-0.405931	-0.183805	-0.463257
TCGA.10.0927.01	cluster3	-0.599346	-0.549144	-0.584448	-0.696169	-0.610153	-0.832009	-0.539961	-0.666431	-0.57882	-0.586653	-0.563386	-0.570713	-0.62784	-0.742093	-0.277333	0.422327	-0.618403	-0.458965	-0.574059
TCGA.10.0936.01	cluster3	-0.228169	-0.136779	-0.278394	-0.500131	-0.277673	-0.0651266	0.00237905	-0.23709	-0.0712045	0.00463255	-0.0738328	0.141396	-0.224051	-0.181681	-0.59307	-0.741623	-0.358334	0.507908	-0.142563
TCGA.13.0724.01	cluster3	-0.315298	-0.21186	-0.374261	-0.621446	-0.21104	-0.373168	-0.337103	-0.400678	-0.213998	-0.276981	-0.327762	-0.220384	-0.220323	-0.261653	-0.413507	0.237922	-0.277857	-0.415173	-0.307439
TCGA.13.0751.01	cluster3	-0.265439	-0.376562	-0.430132	-0.565066	-0.471371	-0.347759	-0.5021	-0.434344	-0.386606	-0.477835	-0.42968	-0.343996	-0.515226	-0.471826	-0.245215	-0.542369	-0.374623	-0.28757	-0.403316
TCGA.13.0764.01	cluster3	-0.1571	0.750975	0.02843	-0.149705	-0.177495	0.0155237	0.604417	-0.152129	0.443568	0.453166	0.54551	0.425313	0.0627531	-0.108319	-0.227196	-0.328738	-0.0623124	-0.233214	0.178977
TCGA.13.0799.01	cluster3	-0.259971	-0.444939	-0.537836	-0.654682	-0.646359	-0.527647	-0.520189	-0.523814	-0.471712	-0.502378	-0.439837	-0.295447	-0.586019	-0.642423	-0.417746	-0.63037	-0.61807	-0.372202	-0.524831
TCGA.13.0884.01	cluster3	0.0339491	0.762897	-0.0561429	-0.0610243	-0.213208	0.103864	0.697492	-0.104625	0.553047	0.548804	0.607591	0.689949	-0.0995873	-0.220766	-0.644481	0.525697	-0.119223	-0.0312764	0.256619
TCGA.13.0904.01	cluster3	-0.317691	0.24705	-0.0850545	-0.352748	-0.191228	-0.419034	-0.0909469	-0.114342	-0.0179033	-0.0997831	-0.161896	-0.0879884	-0.232359	-0.277872	0.097019	-0.194176	-0.00955571	-0.461664	-0.158581
TCGA.13.0921.01	cluster3	-0.0801615	0.54695	-0.0735817	-0.263828	-0.247921	-0.100242	0.366842	-0.143289	0.281507	0.301182	0.363862	0.28309	-0.381576	-0.381339	-0.209492	-0.0474607	-0.182033	0.101363	0.00418681
TCGA.20.0996.01	cluster3	-0.396274	-0.0216885	-0.297355	-0.383714	-0.35476	-0.580018	-0.0905147	-0.362784	-0.206946	-0.208348	-0.16109	-0.223059	-0.405995	-0.183189	-0.384385	0.0696534	-0.337251	-0.149786	-0.2955
TCGA.20.1687.01	cluster3	0.339218	-0.0957288	0.199104	0.210691	0.234087	-0.0855006	0.244096	0.364249	0.24895	0.328815	0.262327	0.109636	0.302631	0.193434	0.370283	0.433733	0.408604	0.232223	0.30037
TCGA.23.1021.01	cluster3	-0.34151	-0.504986	-0.522154	-0.507083	-0.402474	-0.50972	-0.347643	-0.511394	-0.360194	-0.359691	-0.379985	-0.313856	-0.512385	-0.5076	-0.539321	-0.165505	-0.342937	-0.116097	-0.403013
TCGA.23.1032.01	cluster3	-0.502142	-0.702707	-0.5849	-0.733397	-0.606167	-0.66709	-0.686858	-0.644448	-0.488622	-0.564817	-0.60997	-0.489066	-0.557977	-0.612233	-0.703856	-0.6961	-0.675684	-0.562277	-0.571994
TCGA.23.1111.01	cluster3	-0.521135	-0.565407	-0.610477	-0.642776	-0.648453	-0.78064	-0.44524	-0.614113	-0.546025	-0.416393	-0.331216	-0.544988	-0.604098	-0.695261	-0.338015	-0.0518859	-0.583949	-0.335295	-0.508436
TCGA.24.0966.01	cluster3	-0.436493	-0.411502	-0.31225	-0.457624	-0.387658	-0.499324	-0.394082	-0.468149	-0.386077	-0.370792	-0.372444	-0.473879	-0.399739	-0.364098	-0.0180322	-0.58765	-0.387696	-0.418781	-0.391432
TCGA.24.1426.01	cluster3	-0.247786	-0.31658	-0.329812	-0.453073	-0.473208	-0.586705	-0.354521	-0.349843	-0.299313	-0.247294	-0.337964	-0.398051	-0.479411	-0.315321	-0.130866	0.226664	-0.352643	-0.513843	-0.35605
TCGA.24.1431.01	cluster3	-0.150852	-0.115174	-0.212671	0.046558	-0.178672	-0.323563	-0.12793	-0.150417	-0.243984	-0.1331	-0.219023	-0.234418	-0.243074	-0.250826	-0.320453	-0.147651	-0.0188437	-0.385438	-0.221137
TCGA.24.1464.01	cluster3	-0.0825966	0.605544	-0.127456	-0.304105	-0.0297993	0.39492	0.499049	-0.366783	0.0557346	0.239718	0.363177	0.0610068	-0.080032	0.194187	-0.552441	-0.439299	-0.133093	0.214657	-0.0167077
TCGA.24.1467.01	cluster3	-0.401507	-0.13894	-0.245068	-0.535204	0.0416232	-0.257094	-0.378977	-0.288045	-0.279643	-0.346831	-0.364198	-0.327086	-0.0991942	-0.0695326	-0.599628	-0.239562	-0.391873	-0.548533	-0.303657
TCGA.24.1471.01	cluster3	-0.0434927	-0.357743	-0.0653635	-0.31787	-0.283657	-0.480508	-0.210066	0.209722	-0.0374824	-0.104601	-0.221594	-0.0494389	-0.209111	0.0127796	0.27511	-0.618769	0.154603	-0.105933	-0.0876424
TCGA.24.1552.01	cluster3	-0.593987	-0.544125	-0.471642	-0.499663	-0.355861	-0.388898	-0.55763	-0.492582	-0.465581	-0.467898	-0.424379	-0.565838	-0.517412	-0.346847	-0.0419003	-0.338891	-0.562438	-0.452279	-0.457094
TCGA.24.1555.01	cluster3	-0.298717	-0.421766	-0.29498	-0.484532	-0.250199	-0.223116	-0.206065	-0.203191	-0.189556	-0.255107	-0.176453	-0.00958277	-0.289892	-0.185299	-0.582098	-0.547482	-0.312111	-0.301485	-0.281904
TCGA.24.1560.01	cluster3	-0.420562	-0.462681	-0.463736	-0.38739	-0.447595	-0.657996	-0.512804	-0.411766	-0.457176	-0.513921	-0.5639	-0.477354	-0.479048	-0.373092	-0.62316	-0.20349	-0.533381	-0.33921	-0.492749
TCGA.24.1565.01	cluster3	0.324765	0.35455	0.153778	0.165085	0.277811	-0.138823	0.49558	0.3606	0.345602	0.401518	0.381603	0.0668877	0.321943	0.323148	-0.637867	-0.761977	0.539127	-0.255677	0.355562
TCGA.24.1614.01	cluster3	-0.375597	-0.0286347	-0.444482	-0.386805	-0.420427	-0.500185	-0.316357	-0.407192	-0.231823	-0.215627	-0.242577	-0.168834	-0.470753	-0.42133	-0.534935	0.179391	-0.424961	-0.403687	-0.341577
TCGA.24.1845.01	cluster3	-0.0119683	-0.204347	0.123889	0.0617415	0.117718	-0.014096	-0.344274	0.222808	-0.19035	-0.27006	-0.235962	-0.109575	0.149297	0.0553375	0.00171526	-0.465246	0.326678	-0.487308	0.000342084
TCGA.24.1923.01	cluster3	-0.299231	-0.518656	-0.319449	-0.00413935	-0.40725	-0.55215	-0.260972	-0.175698	-0.258105	-0.268624	-0.279611	-0.312089	-0.316196	-0.301205	0.108626	0.599251	0.0972495	-0.685467	-0.244715
TCGA.25.1312.01	cluster3	0.154368	-0.319056	-0.0649714	-0.335978	-0.0234634	0.132777	-0.276131	-0.236223	-0.317061	-0.277065	-0.395703	-0.476168	0.0446553	0.264163	-0.373166	-0.143227	-0.0191653	0.0547938	-0.204584
TCGA.25.1319.01	cluster3	-0.338109	-0.405402	-0.0691789	-0.345634	0.173332	0.0471957	-0.198825	-0.167632	-0.201789	-0.167186	-0.2322	-0.276938	0.187641	0.259156	-0.315251	-0.300374	-0.0573071	-0.233583	-0.123604
TCGA.25.1321.01	cluster3	-0.382267	-0.776838	-0.34208	-0.321569	-0.208302	-0.0953545	-0.545173	-0.269991	-0.456204	-0.435288	-0.573353	-0.608101	-0.156047	-0.152194	-0.619125	-0.570971	-0.124643	-0.54786	-0.334281
TCGA.25.1325.01	cluster3	-0.287364	-0.517592	-0.0699208	-0.388615	0.0330073	0.0411112	-0.253197	-0.494286	-0.277487	-0.22705	-0.330567	-0.152867	-0.00394393	0.0216211	0.169948	0.123608	-0.25627	0.0462051	-0.235245
TCGA.29.1696.01	cluster3	-0.488287	-0.298654	-0.40942	-0.451443	-0.413955	-0.376833	-0.317152	-0.436716	-0.360666	-0.45088	-0.389665	-0.393389	-0.434466	-0.406025	0.0432381	-0.518535	-0.499041	-0.135426	-0.406426
TCGA.29.1761.01	cluster3	0.19361	0.414084	0.223303	0.156219	0.242194	0.514761	0.363307	0.377982	0.0676512	0.161486	0.388087	0.115587	0.12919	0.368367	-0.164128	-0.406613	0.350859	-0.366705	0.207115
TCGA.29.1771.01	cluster3	0.216558	-0.074705	-0.164678	0.100682	-0.193092	-0.376708	0.016988	0.345549	-0.139932	-0.0729865	0.0427863	-0.225579	-0.238248	-0.132019	-0.598371	-0.530173	0.102783	0.231564	-0.00393581
TCGA.29.1775.01	cluster3	-0.362737	-0.32687	-0.230334	-0.12199	-0.413666	-0.458081	-0.125237	-0.185368	-0.201358	-0.342185	-0.188139	-0.233246	-0.301963	-0.334417	-0.505287	0.166736	-0.404469	-0.349947	-0.346752
TCGA.29.1776.01	cluster3	0.18534	-0.391584	-0.100961	-0.0212005	-0.292822	-0.0220074	-0.260853	-0.335814	-0.196735	-0.231106	-0.204254	-0.153515	-0.310305	-0.303063	-0.273941	0.572199	-0.425887	0.217732	-0.175955
TCGA.30.1853.01	cluster3	-0.492152	-0.662207	-0.587698	-0.667126	-0.609943	-0.67737	-0.633253	-0.647182	-0.541171	-0.589392	-0.582767	-0.513285	-0.680556	-0.606518	-0.408732	-0.305262	-0.646286	-0.563341	-0.592272
TCGA.30.1866.01	cluster3	-0.0685269	0.697288	-0.017563	-0.447812	-0.124951	0.048359	0.467229	0.0693065	0.326166	0.330876	0.307622	0.462347	-0.188715	0.000420701	-0.110575	-0.0250314	-0.110824	-0.3073	0.0721469
TCGA.36.2547.01	cluster3	0.361075	0.388359	-0.109264	-0.00837741	-0.276546	-0.434739	0.179256	-0.380444	0.454438	0.347155	0.279116	0.522981	-0.310247	-0.284054	-0.0517739	-0.618971	-0.206378	-0.104555	0.0618883
TCGA.42.2589.01	cluster3	0.223643	0.129716	-0.0180799	-0.00286185	-0.103548	0.172414	-0.128199	-0.12519	-0.132723	-0.146989	-0.178973	0.121968	-0.202403	-0.0884167	0.0345463	-0.528222	-0.428682	0.479464	-0.137077
TCGA.57.1584.01	cluster3	-0.0145262	-0.505854	-0.296562	-0.0169848	-0.0242691	-0.0316406	-0.319371	-0.167125	-0.334212	-0.268293	-0.295818	-0.430052	-0.0799837	0.108345	-0.124513	-0.268593	-0.039794	0.158409	-0.147356
TCGA.59.2349.01	cluster3	0.385025	0.455183	-0.134469	-0.104304	-0.212385	-0.378745	0.122732	-0.37416	0.468411	0.395183	0.282958	0.473946	-0.277748	-0.240214	0.268427	-0.556574	-0.147877	0.0355718	0.0902983
TCGA.59.2372.01	cluster3	0.24901	0.377492	0.255654	0.112294	-0.187126	0.191411	0.405144	-0.0765149	0.384967	0.177743	0.258039	0.441283	0.0790847	-0.196506	-0.225705	-0.225484	-0.364005	0.256687	0.136046
TCGA.61.1733.01	cluster3	-0.233253	-0.538059	-0.31885	-0.184021	-0.333008	-0.309102	-0.470289	-0.0673408	-0.410463	-0.441495	-0.508244	-0.560061	-0.347028	-0.274604	-0.154317	0.475702	-0.289369	-0.31412	-0.34801
TCGA.61.1906.01	cluster3	-0.241571	-0.0820176	-0.160523	-0.241606	-0.414306	-0.475338	-0.115727	0.235005	-0.147717	-0.168969	0.0609745	-0.154643	-0.329815	-0.400336	0.0395364	0.117312	-0.336192	-0.0155419	-0.218648
TCGA.61.1915.01	cluster3	0.189041	0.459481	0.365088	0.268667	0.351576	0.439248	0.507504	0.432219	0.474947	0.476693	0.446061	0.564971	0.243595	0.498214	-0.459956	-0.343046	0.473948	-0.306038	0.3713
TCGA.61.1918.01	cluster3	0.310035	-0.154494	0.189848	0.583816	0.209314	0.0419609	-0.263892	0.32607	-0.0783712	-0.00138592	-0.0831622	-0.166344	0.0265847	0.306828	-0.417185	-0.260635	0.422297	0.38017	0.197208
TCGA.61.2110.01	cluster3	-0.341648	-0.569851	-0.424512	-0.248535	-0.383639	-0.561577	-0.477576	-0.305516	-0.31813	-0.33595	-0.466882	-0.346663	-0.436571	-0.419325	-0.72181	0.0787563	-0.191217	-0.620532	-0.391166
TCGA.04.1348.01	cluster4	0.497858	0.781762	0.604325	0.57848	0.637823	0.616704	0.659421	0.402592	0.602643	0.608997	0.672686	0.668861	0.651664	0.663101	0.286336	-0.607527	0.568857	0.574146	0.568514
TCGA.04.1353.01	cluster4	0.155869	0.344004	0.135674	0.269601	-0.0339756	0.333189	0.22723	0.143868	0.193402	0.129473	0.156441	0.00482409	-0.0432544	0.176313	0.101712	-0.479484	0.228168	0.200479	0.184222
TCGA.09.1662.01	cluster4	0.285541	0.622154	0.424254	0.449864	0.336365	0.254242	0.538869	0.506568	0.244275	0.388369	0.420786	0.0164342	0.191943	0.494357	0.0157886	0.225477	0.508095	-0.480355	0.338282
TCGA.09.2044.01	cluster4	0.4657	-0.504783	0.432048	0.499581	0.466254	0.560232	0.194761	0.530715	0.194529	0.171851	0.154072	0.334709	0.486324	0.457353	0.504748	-0.36763	0.433733	0.231946	0.364947
TCGA.09.2050.01	cluster4	-0.186622	-0.72237	-0.444468	-0.440823	-0.471362	-0.455326	-0.648705	-0.533756	-0.590349	-0.60274	-0.62499	-0.524721	-0.457748	-0.412559	-0.734719	-0.451329	-0.588569	-0.313634	-0.542882
TCGA.13.0758.01	cluster4	0.233086	0.701064	0.0865105	-0.0205816	0.0545655	0.285505	0.471509	0.0768689	0.268124	0.354282	0.536868	0.244565	0.193466	0.0391853	0.285745	0.0464075	-0.0915116	0.231919	0.223722
TCGA.13.0805.01	cluster4	0.184547	0.494341	0.457489	0.183056	0.171828	-0.049975	0.430133	0.278477	0.265047	0.419266	0.454836	0.268902	0.132479	0.361686	0.176666	0.549869	0.357264	0.383535	0.327432
TCGA.13.0897.01	cluster4	0.213824	0.555292	0.295491	-0.0203691	0.381445	0.597983	0.379882	0.0589801	0.182447	0.215222	0.324898	0.258228	0.226498	0.361585	-0.224812	0.147715	-0.0689353	0.282755	0.270499
TCGA.13.0899.01	cluster4	0.0364723	-0.465267	-0.273653	0.118058	-0.0361519	-0.0464944	-0.285729	-0.195737	-0.395319	-0.360173	-0.389334	-0.175871	-0.183419	-0.332798	-0.430366	-0.177015	0.00726963	-0.107737	-0.279362
TCGA.13.0924.01	cluster4	0.616344	0.658551	0.593543	0.597442	0.539568	0.690946	0.609624	0.602391	0.641918	0.623678	0.558589	0.662908	0.637712	0.621774	0.28092	-0.140304	0.530213	0.533953	0.583667
TCGA.13.1410.01	cluster4	0.186962	-0.32188	0.350031	0.248399	0.121426	0.233653	-0.0167213	0.0467568	0.132526	0.216573	0.114041	0.281703	0.417745	0.237907	0.336042	0.349086	0.207863	0.444128	0.229035
TCGA.13.1484.01	cluster4	0.758406	0.936015	0.716565	0.61437	0.576586	0.723303	0.816502	0.519442	0.831723	0.791558	0.815092	0.885645	0.675196	0.608493	-0.361444	-0.14281	0.519325	0.669049	0.672046
TCGA.13.1504.01	cluster4	0.39958	-0.509722	0.363181	0.442087	0.574994	0.457739	-0.120229	0.560813	-0.0253922	0.117803	-0.2756	-0.137974	0.469523	0.622475	0.652432	0.662415	0.610532	0.432719	0.39841
TCGA.13.1506.01	cluster4	-0.216732	-0.455063	-0.425285	-0.428725	-0.410869	-0.434573	-0.367828	0.119636	-0.398899	-0.431245	-0.356828	-0.330585	-0.406996	-0.297821	-0.598842	-0.508795	-0.453767	0.282115	-0.371845
TCGA.13.1507.01	cluster4	0.425722	0.642679	0.563817	0.417344	0.416371	0.543249	0.660229	0.570912	0.583616	0.55934	0.595429	0.61636	0.493802	0.425177	0.0295658	0.484561	0.340702	0.766169	0.484517
TCGA.13.1817.01	cluster4	0.661662	0.48122	0.609758	0.685462	0.557709	0.604306	0.57186	0.554271	0.630707	0.644652	0.628139	0.619275	0.603095	0.54939	0.616943	-0.290864	0.67955	0.693284	0.63186
TCGA.13.2057.01	cluster4	0.522704	0.63245	0.468268	0.485795	0.351964	0.516743	0.600298	0.323027	0.631439	0.649918	0.648022	0.75056	0.45177	0.365722	0.428885	0.495397	0.402096	0.434741	0.51161
TCGA.23.1027.01	cluster4	0.102101	-0.394133	0.370981	0.25048	0.402943	0.312271	-0.142256	0.365956	-0.166685	-0.0181494	-0.438691	-0.281171	0.395333	0.476324	-0.251487	0.311985	0.386114	0.0570734	0.214857
TCGA.23.1030.01	cluster4	-0.33433	-0.131099	0.105717	-0.325366	-0.152728	-0.2061	-0.170122	-0.331567	-0.146364	-0.17084	-0.329714	-0.0519502	-0.263753	-0.31741	0.25613	-0.358929	-0.289027	-0.526788	-0.204659
TCGA.23.1123.01	cluster4	0.421702	0.612083	0.549686	0.361989	0.45114	0.603974	0.64958	0.399977	0.605443	0.635464	0.689435	0.62565	0.572026	0.613566	0.156074	-0.558377	0.469359	0.15302	0.528415
TCGA.23.2079.01	cluster4	0.485457	0.566063	0.471103	0.27505	0.333106	0.497798	0.543253	0.334555	0.456883	0.389163	0.41277	0.487723	0.324129	0.352296	0.429048	-0.20139	0.417165	-0.278507	0.395541
TCGA.23.2645.01	cluster4	0.751364	0.507113	0.541668	0.6792	0.550672	0.72516	0.601147	0.620326	0.535557	0.60978	0.582295	0.551184	0.568342	0.508998	0.463046	-0.303033	0.639722	0.711677	0.568834
TCGA.24.1422.01	cluster4	0.485612	0.830842	0.502183	0.588088	0.407219	0.556309	0.684679	0.465246	0.495333	0.577975	0.602028	0.361107	0.318527	0.59661	0.693359	0.610097	0.53813	0.483806	0.496691
TCGA.24.1428.01	cluster4	0.370744	0.44619	0.556942	0.351108	0.584961	0.650686	0.508715	0.457315	0.445368	0.38905	0.448276	0.455207	0.624073	0.599	-0.0748057	-0.501851	0.443837	0.352261	0.454115
TCGA.24.1436.01	cluster4	0.237068	0.611358	0.393418	0.467843	0.348813	0.369436	0.426882	0.360446	0.333449	0.368024	0.434211	0.277371	0.310655	0.424494	0.417702	-0.494039	0.387616	0.16323	0.366965
TCGA.24.1470.01	cluster4	0.673379	0.674007	0.684897	0.563022	0.582008	0.623495	0.643776	0.584072	0.676662	0.674242	0.641349	0.739534	0.629053	0.651483	0.399752	-0.492487	0.646876	0.537677	0.628836
TCGA.24.1549.01	cluster4	0.23406	0.733006	0.243147	0.223172	0.0322126	0.185222	0.545757	0.0146168	0.440784	0.488411	0.540035	0.350565	0.187632	0.119194	-0.497535	-0.675033	-0.190884	0.380384	0.271373
TCGA.24.1551.01	cluster4	0.570738	0.699049	0.563693	0.576685	0.527972	0.511641	0.69006	0.66595	0.540342	0.59873	0.620382	0.566529	0.508513	0.540114	0.105331	-0.392823	0.659197	0.400383	0.566915
TCGA.24.1556.01	cluster4	-0.00400551	0.300675	0.120954	0.0768712	-0.000458895	0.43631	0.447286	0.00106503	0.249372	0.234349	0.16108	0.22268	0.232745	0.0554954	0.103391	-0.509218	-0.187696	-0.34952	0.198096
TCGA.24.1562.01	cluster4	0.403333	0.224487	0.0411746	0.225994	-0.0890215	0.148859	0.525757	0.106664	0.224461	0.412552	0.417166	0.31232	-0.113616	0.162644	-0.248484	0.35618	0.187434	0.531946	0.239888
TCGA.24.1563.01	cluster4	0.22981	0.0561824	0.274015	0.529597	0.227895	0.112375	0.41871	0.545793	0.165601	0.296551	0.297071	0.308811	0.0890218	0.443095	0.52362	0.743004	0.315204	0.633649	0.301707
TCGA.24.1846.01	cluster4	0.423555	0.404022	0.391907	0.337921	0.225016	0.333575	0.362915	0.454108	0.285174	0.222734	0.265835	0.537369	0.325001	0.325522	-0.481666	0.181697	0.179001	0.282123	0.314986
TCGA.24.1920.01	cluster4	0.0185447	0.531034	0.115038	0.348159	-0.0718511	0.000982886	0.246208	0.414552	0.159585	0.154446	0.244309	0.021335	0.0832778	-0.000598958	0.214416	-0.353349	0.237051	-0.550084	0.144579
TCGA.25.1635.01	cluster4	0.341511	0.460493	0.315399	0.513938	0.432962	0.488832	0.502872	0.382915	0.39294	0.392244	0.439061	0.339607	0.415764	0.519653	0.353956	0.767351	0.411007	0.103466	0.404622
TCGA.25.2391.01	cluster4	0.193477	-0.0534319	0.0157084	0.264712	0.165848	-0.328557	0.0131298	0.511698	-0.127374	-0.0588558	-0.218949	0.278134	0.135171	-0.197096	-0.578717	-0.656509	0.171447	0.13508	0.0794364
TCGA.25.2399.01	cluster4	0.283039	0.851325	0.421288	0.611369	0.369596	0.486725	0.561953	0.486755	0.367947	0.452106	0.522946	0.39854	0.284515	0.390074	0.268814	0.196468	0.363602	0.391872	0.368489
TCGA.29.1688.01	cluster4	0.625585	0.57756	0.523051	0.624022	0.517946	0.649487	0.579464	0.588273	0.539831	0.549352	0.558335	0.553686	0.567551	0.599205	0.706399	0.338588	0.633021	0.351816	0.566033
TCGA.29.1694.01	cluster4	0.0495857	-0.194947	0.187058	0.0170436	0.249661	-0.0661296	-0.221075	0.24673	-0.134557	-0.107772	-0.113494	-0.264952	0.0189843	-0.0263428	0.394274	0.463482	0.0915495	-0.119239	0.0824
TCGA.29.1707.01	cluster4	0.437254	0.465659	0.584571	0.536178	0.534299	0.498235	0.541327	0.641836	0.366781	0.47657	0.475931	0.26394	0.52607	0.609376	0.3375	-0.605489	0.586688	0.41426	0.487736
TCGA.29.1711.01	cluster4	0.592057	0.700871	0.490684	0.582304	0.462177	0.541093	0.641371	0.245091	0.562409	0.600205	0.653431	0.59209	0.540809	0.3287	0.365382	-0.276739	0.462022	0.131008	0.529499
TCGA.29.1768.01	cluster4	0.483607	0.784516	0.606836	0.593381	0.549511	0.327957	0.661016	0.53196	0.55115	0.63512	0.659133	0.603317	0.56918	0.611684	0.535325	0.765855	0.55564	0.589095	0.598418
TCGA.29.1777.01	cluster4	0.447221	0.446459	0.321755	0.326926	-0.00980759	0.175253	0.345958	0.421371	0.304883	0.223138	0.256875	0.33728	0.0863333	0.0938946	0.351455	0.694539	0.135821	0.197673	0.210099
TCGA.29.1781.01	cluster4	0.557689	0.894881	0.610355	0.43324	0.549837	0.863398	0.782104	0.68782	0.68637	0.708995	0.769011	0.64193	0.592875	0.7168	-0.0356497	-0.0106392	0.595846	0.636232	0.612305
TCGA.29.1783.01	cluster4	0.359534	0.440678	0.470236	0.348468	0.403571	0.13355	0.494125	0.57661	0.295237	0.419552	0.496296	0.13941	0.429968	0.494645	-0.0413884	0.359826	0.56499	-0.0331077	0.404692
TCGA.29.2428.01	cluster4	0.35153	0.727221	0.573752	0.318984	0.573509	0.537392	0.65136	0.439277	0.611442	0.58461	0.628939	0.709899	0.553079	0.605109	-0.631545	-0.355854	0.449635	0.521153	0.505143
TCGA.30.1856.01	cluster4	0.675355	0.800486	0.63768	0.646063	0.467145	0.490245	0.740703	0.607264	0.691739	0.730595	0.742343	0.685523	0.476768	0.565456	0.450974	-0.05837	0.585504	0.299521	0.597453
TCGA.36.2549.01	cluster4	0.528141	0.435963	0.518928	0.614438	0.631099	0.614849	0.387055	0.516713	0.506837	0.521134	0.504204	0.440754	0.634286	0.625892	0.29659	0.201677	0.579115	0.699042	0.540911
TCGA.36.2552.01	cluster4	0.481559	0.82048	0.522941	0.60543	0.515209	0.645653	0.632897	0.519209	0.652016	0.677427	0.655507	0.657424	0.46809	0.573301	0.525401	0.593986	0.543826	0.490861	0.561586
TCGA.57.1994.01	cluster4	0.454951	0.746375	0.518085	0.360349	0.411298	0.608054	0.661158	0.0819645	0.666996	0.62463	0.630083	0.743409	0.510823	0.49548	-0.506346	-0.585443	0.406942	0.364626	0.505388
TCGA.59.2348.01	cluster4	0.396174	-0.122034	0.102101	0.0599139	0.214671	0.0541753	-0.12206	0.238754	-0.218083	-0.0543396	0.019176	-0.0474739	0.213749	0.0357325	0.630708	-0.149954	0.174955	0.269556	0.0391296
TCGA.59.2351.01	cluster4	0.441082	0.594366	0.546387	0.647308	0.615791	0.595363	0.451663	0.59788	0.614649	0.541898	0.525245	0.58267	0.621476	0.638452	0.176447	0.106438	0.632233	0.684011	0.556727
TCGA.59.2352.01	cluster4	0.0756702	0.214808	0.195239	0.116535	0.0697484	0.24865	0.167238	-0.145329	0.0223081	-0.0153625	0.146198	0.092352	0.320863	-0.103452	-0.386165	-0.0992708	-0.095085	0.259155	0.0763211
TCGA.61.2016.01	cluster4	0.195323	0.124799	0.119476	0.14173	0.284826	-0.29121	0.183093	0.406196	-0.0190519	0.00869674	-0.0894438	-0.157176	0.236857	0.131432	0.681757	-0.514509	0.152238	0.0137622	0.166882
TCGA.61.2104.01	cluster4	0.598836	0.288882	0.557778	0.463934	0.499167	0.544025	0.353795	0.431284	0.474775	0.466617	0.384705	0.461644	0.579481	0.468634	-0.114931	-0.588081	0.527064	0.336359	0.520558
TCGA.61.2614.01	cluster4	0.0979046	0.0620741	0.194394	0.359734	-0.0130035	0.134152	0.107474	-0.261847	0.0225989	0.00631387	0.0705289	0.0359161	0.276728	-0.10713	-0.320342	0.0265586	-0.162077	0.333609	0.059718
TCGA.04.1369.01	cluster5	0.262197	-0.354905	0.411188	0.394606	0.474867	0.604648	0.167177	0.464561	0.192566	0.144994	-0.0239607	0.273282	0.483841	0.529266	0.474186	-0.517314	0.361136	0.132334	0.313576
TCGA.04.1516.01	cluster5	0.361312	-0.533028	-0.18668	0.156302	-0.0153762	-0.212426	-0.466782	0.0804235	-0.262416	-0.326234	-0.501192	-0.301164	0.0697534	-0.276955	-0.154638	-0.59745	-0.0246389	-0.0465426	-0.087414
TCGA.09.0367.01	cluster5	-0.0756257	-0.289245	-0.132292	-0.444995	-0.233091	-0.0948385	-0.175992	0.0431977	-0.189603	-0.206942	-0.137063	-0.292814	-0.234623	-0.204495	-0.565924	-0.545974	0.0261172	-0.0183083	-0.161445
TCGA.09.2045.01	cluster5	0.322783	-0.330414	-0.069962	0.0684429	0.0902883	-0.134663	-0.123426	-0.0126797	-0.227452	-0.225644	-0.441493	-0.244908	0.127282	-0.148823	-0.0753981	-0.533584	0.12669	-0.157746	-0.00986729
TCGA.09.2051.01	cluster5	0.515528	0.574051	0.409088	0.342524	0.388189	0.539005	0.430501	0.50357	0.349074	0.347274	0.291531	0.383093	0.42668	0.428241	-0.0614634	-0.360146	0.218394	-0.129779	0.364318
TCGA.09.2056.01	cluster5	0.461217	0.356158	0.372312	0.322862	0.237482	0.348236	0.462946	0.625643	0.285446	0.299764	0.436526	0.126965	0.271919	0.379029	-0.213676	-0.0686938	0.489798	0.65661	0.331875
TCGA.10.0931.01	cluster5	-0.201661	-0.259112	-0.430293	-0.00129168	-0.44896	-0.548209	-0.318821	-0.505374	-0.428096	-0.378128	-0.32868	-0.310213	-0.444374	-0.544841	-0.704563	-0.657163	-0.503798	-0.478772	-0.382082
TCGA.10.0937.01	cluster5	-0.0434414	0.341629	-0.00520869	-0.127614	0.196883	0.523938	0.42536	0.012157	0.269998	0.194092	0.20831	0.299156	0.149529	0.187027	-0.427095	-0.527143	-0.0416435	0.0145301	0.170923
TCGA.13.0795.01	cluster5	0.345456	0.470536	0.512979	0.288702	0.353023	-0.202279	0.538087	0.429392	0.437678	0.530315	0.426153	0.453651	0.377293	0.563763	0.175027	-0.393952	0.583925	0.258713	0.424155
TCGA.13.0803.01	cluster5	0.0729263	0.432449	-0.00283887	-0.363072	-0.191474	-0.320857	0.359365	-0.276528	0.206456	0.223607	0.318918	0.276746	-0.108795	-0.276167	0.271935	0.0716556	-0.0877557	-0.303453	-0.00831238
TCGA.13.0887.01	cluster5	-0.0116052	-0.63662	-0.277139	-0.144135	-0.172656	-0.44162	-0.528091	-0.41145	-0.436704	-0.481882	-0.541531	-0.365265	0.0202962	-0.316866	0.0698022	-0.16557	-0.367694	-0.29799	-0.335479
TCGA.13.0889.01	cluster5	0.321736	0.883081	0.537906	0.362274	0.484257	0.378025	0.732441	0.29018	0.569309	0.614676	0.74233	0.585655	0.527477	0.516468	-0.140612	-0.0887421	0.321586	0.474418	0.47624
TCGA.13.0923.01	cluster5	-0.270453	0.0936173	-0.318707	-0.380212	-0.2312	-0.101782	-0.0478544	-0.40489	-0.238532	-0.146087	-0.0428131	-0.124595	-0.0690199	-0.427377	-0.303925	-0.751888	-0.417841	0.160465	-0.221269
TCGA.13.1496.01	cluster5	0.393268	0.659446	0.413862	0.29434	0.416696	0.318895	0.553201	0.268475	0.543056	0.471122	0.574287	0.58666	0.451051	0.269733	-0.457708	-0.669798	0.353208	0.0242584	0.4192
TCGA.13.1819.01	cluster5	0.0426769	-0.251157	-0.129646	-0.142667	-0.0768854	0.103947	-0.0472027	-0.0335076	-0.236022	-0.328611	-0.194397	-0.211095	-0.00409361	-0.171888	0.434323	-0.611154	-0.297854	0.561269	-0.145784
TCGA.13.2060.01	cluster5	0.438484	0.682483	0.551923	0.449883	0.427778	0.411561	0.510525	0.353036	0.575661	0.524913	0.523515	0.575201	0.52563	0.369813	-0.00505705	-0.178123	0.425536	0.184947	0.483249
TCGA.23.1119.01	cluster5	0.326167	0.510851	0.292706	0.279424	0.243498	0.265628	0.519058	0.37248	0.437342	0.477689	0.502763	0.434538	0.292247	0.0809539	0.366882	-0.150535	0.370753	0.650104	0.379681
TCGA.23.2077.01	cluster5	0.243781	-0.451138	0.324864	0.318313	0.458819	0.357467	-0.128557	0.363204	-0.034941	-0.113315	-0.330283	-0.264776	0.394944	0.338061	0.0078943	-0.274095	0.434217	-0.436871	0.222684
TCGA.23.2084.01	cluster5	0.276551	-0.333696	0.0496528	0.289787	0.396071	0.352221	-0.396509	0.293816	-0.0686199	-0.129711	-0.0316527	-0.337972	0.332945	0.361974	0.454355	0.197373	0.454005	0.248659	0.163439
TCGA.24.1104.01	cluster5	0.421104	0.654397	0.296323	0.374897	0.322348	0.244061	0.552958	0.430498	0.568764	0.577979	0.560518	0.596816	0.293686	0.19859	0.0806881	0.0310864	0.494266	0.533042	0.454527
TCGA.24.1105.01	cluster5	0.08599	0.493328	-0.064029	-0.106917	0.0732512	0.467931	0.222681	0.0663311	0.222679	0.27973	0.365971	0.269282	0.0128673	0.0757129	-0.393756	0.163569	-0.173366	0.373243	0.0974346
TCGA.24.1548.01	cluster5	-0.129945	-0.584061	-0.349096	-0.240605	-0.291421	-0.347726	-0.443914	-0.216515	-0.447139	-0.491188	-0.485215	-0.446233	0.00204814	-0.213089	-0.745925	-0.483137	-0.419132	-0.222844	-0.367318
TCGA.24.1843.01	cluster5	0.408028	0.454415	0.574682	0.238866	0.497263	0.560112	0.423731	0.419058	0.448171	0.44527	0.392938	0.505278	0.507025	0.606948	-0.0889849	-0.325092	0.588498	0.540297	0.451472
TCGA.24.1928.01	cluster5	-0.221364	-0.356342	-0.0166561	0.298736	0.303547	-0.092078	-0.2904	-0.203002	-0.0761945	0.0387244	-0.114024	-0.0697963	0.332654	0.0517038	0.719809	0.339614	0.221234	0.0131594	0.0783152
TCGA.25.1625.01	cluster5	0.467921	-0.0760346	0.279657	0.605346	0.290207	0.412337	0.150115	0.627603	-0.131516	-0.0212602	-0.0123927	-0.366524	0.16606	0.303024	0.283953	0.409797	0.536866	0.336233	0.297641
TCGA.25.1870.01	cluster5	-0.0470047	-0.413407	-0.0422657	0.392433	0.188885	0.118784	-0.293401	0.15408	-0.312625	-0.359199	-0.421771	-0.469133	0.149209	0.155061	0.102917	-0.606733	0.307586	-0.489245	-0.138902
TCGA.25.2392.01	cluster5	0.712483	-0.536441	0.649473	0.743042	0.723317	0.809053	0.156767	0.676095	0.474947	0.421731	0.1757	0.462256	0.651424	0.80114	0.476007	-0.334973	0.809422	0.60757	0.594472
TCGA.25.2396.01	cluster5	0.0320224	0.633455	0.115556	-0.120651	0.144865	0.353518	0.56077	-0.06562	0.332025	0.383903	0.354698	0.35936	0.384652	0.0942017	0.166447	-0.267266	-0.0666018	-0.195987	0.230076
TCGA.29.1699.01	cluster5	0.561749	0.547747	0.564382	0.515784	0.541963	0.658497	0.48023	0.533003	0.469152	0.521701	0.58468	0.421228	0.614505	0.563947	0.536787	-0.61976	0.592089	0.289582	0.52873
TCGA.29.1701.01	cluster5	0.0520863	0.412562	0.465507	0.277743	0.350606	0.490531	0.20929	0.454208	0.36293	0.312952	0.168244	0.382616	0.378905	0.507413	-0.188138	0.415561	0.271145	0.33048	0.317893
TCGA.29.2429.01	cluster5	-0.400964	-0.643084	-0.469885	-0.507097	-0.397351	-0.684358	-0.618222	-0.22814	-0.548702	-0.546186	-0.581112	-0.599141	-0.396332	-0.556138	-0.760114	-0.137707	-0.58008	-0.10342	-0.462362
TCGA.29.2431.01	cluster5	-0.393374	-0.735221	-0.299274	-0.548023	-0.246417	-0.101105	-0.477483	-0.479872	-0.457492	-0.489108	-0.536278	-0.445499	-0.256512	-0.300775	-0.185752	-0.586606	-0.447219	-0.629358	-0.397881
TCGA.29.2432.01	cluster5	0.799611	-0.662599	0.615975	0.696855	0.724809	0.859693	0.0239084	0.753348	0.478952	0.448118	0.129748	0.462212	0.676301	0.765591	0.385573	-0.399143	0.796221	0.632205	0.621643
TCGA.29.2436.01	cluster5	-0.0879373	0.485553	0.0863108	-0.023836	0.0701398	0.362438	0.479523	0.084186	0.245918	0.257517	0.417304	0.162973	0.33129	0.193536	-0.0766163	-0.145707	-0.0933495	-0.137853	0.179127
TCGA.36.2543.01	cluster5	0.152567	0.24384	0.138567	0.178527	0.0876806	0.0533444	0.102596	0.310803	-2.22496e-05	-0.119765	0.149169	-0.226582	0.11223	0.189651	-0.466306	-0.198795	-0.058128	0.272369	0.0439695
TCGA.36.2551.01	cluster5	0.00559483	-0.351172	-0.225578	-0.177667	0.00398517	0.328947	-0.265685	-0.0710695	-0.235472	-0.338291	-0.29453	-0.38762	-0.0104155	-0.0660052	0.535663	-0.533901	-0.287085	0.582139	-0.17083
TCGA.42.2588.01	cluster5	0.397408	0.609084	0.382069	0.368504	0.472914	0.539551	0.34811	0.488279	0.284304	0.27598	0.242815	0.305689	0.465331	0.421602	0.0587412	-0.276914	0.190598	0.110719	0.340191
TCGA.42.2590.01	cluster5	0.474095	0.675669	0.567933	0.461164	0.483991	0.569817	0.561982	0.365809	0.554469	0.516906	0.522	0.560491	0.577341	0.383092	-0.154313	-0.303955	0.452389	0.26513	0.491397
TCGA.57.1993.01	cluster5	-0.263383	-0.651945	-0.315323	-0.0875491	-0.0323337	-0.0368924	-0.502667	-0.162133	-0.506262	-0.549435	-0.585314	-0.627031	-0.179172	0.0790477	-0.447249	-0.34571	-0.0959676	-0.116855	-0.328345
TCGA.59.2355.01	cluster5	0.13259	0.457845	-0.138294	0.0380287	-0.151591	-0.247971	0.401035	-0.166833	0.0360662	0.321131	0.443608	0.183049	-0.134248	-0.18355	0.160192	0.163009	-0.119524	0.0396327	0.0161862
TCGA.61.1725.01	cluster5	0.0740824	0.395016	0.129691	0.219488	0.166683	0.298157	0.277172	0.575707	-0.010021	0.0860708	0.215631	-0.0940932	0.0716966	0.194709	0.544705	0.612339	0.198826	0.193894	0.183559
TCGA.61.1738.01	cluster5	0.0249054	-0.307636	0.0478811	-0.37581	-0.0636576	-0.0642203	-0.327119	0.0673624	-0.319097	-0.408337	-0.281101	-0.412417	0.00416421	-0.0666841	-0.297303	-0.611881	-0.222006	0.283632	-0.147168
TCGA.61.1901.01	cluster5	-0.279296	-0.207457	-0.158968	-0.169615	-0.0198179	-0.569972	-0.268308	0.036759	-0.19043	-0.285212	-0.204805	-0.220042	-0.184368	0.164283	0.0154439	0.14309	0.115078	-0.0660068	-0.160189
TCGA.61.1904.01	cluster5	0.224517	0.0339827	0.162527	0.488725	0.2506	0.0349813	0.240677	0.514305	0.170244	0.228525	0.326603	-0.0375139	0.0613194	0.336752	-0.396713	0.380151	0.445823	0.198803	0.271341
TCGA.61.1911.01	cluster5	0.63309	0.940751	0.52308	0.473002	0.362274	0.72208	0.816341	0.543068	0.760484	0.74058	0.786149	0.737333	0.429705	0.533842	-0.0637635	-0.247708	0.419741	0.714503	0.598978
TCGA.61.1995.01	cluster5	0.38086	0.389543	0.557454	0.503616	0.559261	0.204588	0.300542	0.511994	0.5138	0.505422	0.397757	0.559321	0.521408	0.601017	-0.63169	-0.329918	0.587005	-0.0713548	0.477373
TCGA.61.2018.01	cluster5	0.032282	0.111982	-0.131227	0.257145	-0.16742	-0.26848	0.292728	0.228264	0.152729	0.00333946	-0.0163308	0.101179	-0.231205	-0.000698654	-0.15477	0.299283	-0.148726	-0.245787	-0.0678443
TCGA.61.2087.01	cluster5	0.481857	0.622851	0.229312	-0.11871	0.0523585	-0.0830846	0.515678	0.0534688	0.455043	0.48235	0.558306	0.523456	0.165616	0.13694	0.407028	-0.464296	0.307017	-0.0613364	0.297929
TCGA.04.1336.01	cluster6	0.291502	0.110354	0.244681	-0.195784	0.282988	0.36758	0.330005	0.248543	0.299558	0.298818	0.222807	0.377321	0.353962	0.358433	-0.0959178	-0.654347	0.38785	-0.0505939	0.28399
TCGA.04.1343.01	cluster6	0.204643	0.122071	0.180087	-0.145161	-0.0938066	0.276322	0.420413	-0.0368522	0.293359	0.410157	0.192608	0.394134	0.166768	0.0356041	0.199255	0.444406	0.0547529	0.114508	0.169444
TCGA.04.1346.01	cluster6	0.558544	0.663703	0.556774	0.482743	0.501005	0.520184	0.642024	0.550085	0.519777	0.566504	0.605855	0.534143	0.539754	0.55037	-0.36929	-0.168603	0.623286	0.380927	0.525996
TCGA.04.1357.01	cluster6	0.8189	0.937593	0.740919	0.711424	0.664774	0.917532	0.872109	0.653397	0.825796	0.82209	0.855756	0.844558	0.745357	0.798503	0.599069	0.441433	0.688141	0.690194	0.739145
TCGA.04.1367.01	cluster6	-0.0409814	-0.151903	-0.053039	0.0927004	0.105676	-0.132437	-0.0913767	-0.113484	-0.00136826	-0.00763608	-0.0344573	0.170432	0.0368095	-0.0875352	-0.332611	-0.201951	0.0943029	-0.0384893	0.00674684
TCGA.04.1654.01	cluster6	0.31903	0.134702	0.181722	0.0874626	0.0454695	0.438807	0.0475121	0.010179	0.113344	0.174235	0.0842775	0.213079	-0.120566	0.0245863	-0.116701	0.220109	0.0759431	0.327436	0.119231
TCGA.09.0366.01	cluster6	0.42398	-0.0141266	0.54252	0.531015	0.636583	0.541909	0.326813	0.654441	0.367915	0.359502	0.297823	0.101914	0.542209	0.63915	0.0139604	-0.596628	0.763547	0.123315	0.533612
TCGA.09.2043.01	cluster6	0.2004	0.516703	0.162121	0.320895	0.0188596	0.251329	0.419469	0.341912	0.323446	0.337976	0.32902	0.205962	-0.0566846	0.162784	0.0165207	-0.210654	0.324864	0.278836	0.265402
TCGA.13.0755.01	cluster6	0.0875208	0.613096	0.345631	0.249994	0.0502822	0.0209389	0.592491	0.428932	0.283182	0.420113	0.523557	0.405552	0.133958	0.232551	-0.385443	0.131263	0.097549	0.179494	0.277534
TCGA.13.0792.01	cluster6	-0.155669	0.654156	0.292506	-0.0308106	0.0844952	0.372123	0.590625	0.0109999	0.411918	0.312917	0.528453	0.412034	0.0530558	0.313953	-0.0788709	-0.410296	0.103445	0.11641	0.235757
TCGA.13.0801.01	cluster6	0.541705	0.384493	0.665835	0.435277	0.637783	0.706503	0.552378	0.584867	0.505616	0.527213	0.522915	0.475608	0.658022	0.782005	0.331139	-0.331399	0.657314	0.328254	0.554166
TCGA.13.0804.01	cluster6	0.250519	0.574456	0.229596	0.215076	0.187107	-0.228137	0.455842	0.458192	0.344393	0.36622	0.341527	0.204971	0.127086	0.203916	0.510927	-0.141805	0.508347	-0.0847105	0.290269
TCGA.13.0885.01	cluster6	0.48662	0.662789	0.567661	0.386915	0.428994	0.582549	0.608001	0.37539	0.623356	0.619461	0.586155	0.688937	0.545365	0.543573	0.0938436	0.216185	0.553835	0.134774	0.544753
TCGA.13.0893.01	cluster6	-0.24216	0.728436	0.0271263	-0.298322	-0.000451608	0.307419	0.553107	0.0575916	0.410526	0.464506	0.53918	0.641798	-0.0750333	0.0233777	-0.148281	0.546136	-0.0743201	0.158679	0.193826
TCGA.13.1405.01	cluster6	0.245564	0.735652	0.310048	0.0251081	0.151308	0.0275031	0.570827	0.142402	0.431675	0.529731	0.471792	0.360829	0.256477	0.171481	0.649103	0.576551	0.312522	0.0965758	0.330451
TCGA.23.1028.01	cluster6	-0.30651	0.0148745	-0.370266	-0.483692	-0.463973	-0.666018	0.21707	-0.344676	0.0529869	-0.119061	0.0562981	0.188792	-0.37603	-0.583038	-0.404347	-0.387953	-0.530724	-0.287592	-0.258834
TCGA.23.1120.01	cluster6	0.0783263	0.597647	0.502084	0.388218	0.416371	0.461814	0.560009	0.240399	0.439726	0.452017	0.49525	0.388581	0.480675	0.512533	0.229989	0.155976	0.35152	-0.243016	0.411838
TCGA.23.1124.01	cluster6	0.157583	0.472602	0.172186	0.222324	0.204835	-0.209059	0.376287	0.0284614	0.151574	0.272198	0.28757	0.311035	0.245216	-0.0171751	-0.0447755	0.0857784	0.222645	-0.264347	0.179435
TCGA.23.2072.01	cluster6	-0.343613	0.178981	-0.400207	-0.321259	-0.325414	-0.610768	-0.164524	-0.302017	-0.279612	-0.120099	-0.115711	-0.301672	-0.380898	-0.269922	-0.392399	-0.42697	-0.000682291	-0.442893	-0.257023
TCGA.24.0968.01	cluster6	0.453886	0.655646	0.533628	0.350772	0.490062	0.350189	0.625923	0.507798	0.491471	0.580769	0.538989	0.565611	0.52591	0.504384	0.455293	0.310243	0.572621	0.265311	0.491729
TCGA.24.1413.01	cluster6	0.0151665	-0.283531	-0.230728	-0.0946133	-0.233973	0.0656419	-0.175364	0.10309	-0.360309	-0.291408	-0.384353	-0.376813	-0.182947	-0.1431	-0.209108	-0.232197	-0.155365	-0.190296	-0.231286
TCGA.24.1553.01	cluster6	0.664274	0.797752	0.639732	0.69827	0.527506	0.798831	0.82887	0.580203	0.776665	0.794122	0.802895	0.809239	0.566921	0.651245	-0.537263	-0.461796	0.626747	0.632499	0.658477
TCGA.24.1842.01	cluster6	0.525705	0.885491	0.513555	0.499949	0.561732	0.680055	0.734919	0.517351	0.621287	0.646824	0.69931	0.637756	0.595462	0.555462	-0.495647	-0.292818	0.506239	0.412442	0.543065
TCGA.24.1924.01	cluster6	0.611039	0.719913	0.673024	0.698719	0.678613	0.707883	0.704352	0.709904	0.655996	0.63727	0.669945	0.730938	0.708026	0.672934	0.527807	0.0146692	0.594588	0.689295	0.637462
TCGA.24.1930.01	cluster6	0.687873	0.541242	0.734447	0.683463	0.677543	0.825699	0.574648	0.718633	0.698339	0.627962	0.576965	0.608588	0.702392	0.697406	0.654713	0.675578	0.723789	0.653586	0.669495
TCGA.24.2023.01	cluster6	-0.0372098	0.532044	-0.0849325	0.37251	-0.00664336	0.283965	0.402706	0.00218083	0.0206208	0.176748	0.329496	0.0130066	0.0177067	-0.143903	-0.630277	-0.649654	-0.206821	0.09375	-0.0284947
TCGA.24.2026.01	cluster6	0.266189	0.578777	0.32893	0.072047	0.262694	0.360467	0.351831	0.281796	0.483901	0.426511	0.325887	0.588909	0.404874	0.238019	-0.0303558	-0.25672	0.220659	0.0289704	0.287022
TCGA.24.2029.01	cluster6	0.617667	0.663428	0.523362	0.722735	0.474922	0.609938	0.644335	0.727547	0.550288	0.580567	0.554485	0.576869	0.454663	0.440482	0.65067	0.548616	0.500398	0.547868	0.534709
TCGA.24.2038.01	cluster6	-0.117758	-0.323954	-0.32956	-0.292468	-0.428248	-0.750954	-0.314984	-0.354974	-0.313317	-0.368515	-0.474398	-0.236822	-0.446513	-0.533577	-0.438875	-0.362862	-0.312781	-0.575979	-0.361456
TCGA.24.2261.01	cluster6	0.568094	0.766071	0.610766	0.586179	0.62435	0.658161	0.734933	0.661515	0.762553	0.72153	0.759745	0.808122	0.69781	0.60099	0.0704142	-0.0278537	0.668247	0.39759	0.653757
TCGA.24.2267.01	cluster6	0.767185	0.685225	0.758474	0.740376	0.70203	0.801475	0.705793	0.688945	0.766959	0.752728	0.714717	0.802221	0.779996	0.703169	0.54535	-0.36589	0.723401	0.612619	0.711531
TCGA.24.2271.01	cluster6	0.588134	0.656271	0.46249	0.521791	0.375826	0.545115	0.659715	0.404891	0.662326	0.637664	0.63324	0.739877	0.455908	0.474511	0.22466	0.519004	0.477572	0.430759	0.526649
TCGA.25.1313.01	cluster6	0.272753	-0.512714	0.510512	0.565033	0.593832	0.638738	-0.0455123	0.623518	0.0462726	0.0585199	-0.060976	-0.41528	0.620443	0.675308	0.37049	0.597527	0.68009	0.137012	0.446569
TCGA.25.1326.01	cluster6	0.424331	0.172024	0.492718	0.573343	0.62328	0.659909	0.363574	0.573118	0.344438	0.342028	0.261097	0.362453	0.616039	0.644728	0.142529	0.676227	0.553206	0.449381	0.456218
TCGA.25.1328.01	cluster6	0.161302	0.412193	0.292594	0.288521	0.0121512	-0.0567576	0.221967	0.353012	0.201441	0.202928	0.0360228	0.0920782	0.0108485	0.305139	0.324999	0.71874	0.388974	-0.335585	0.176558
TCGA.25.1878.01	cluster6	0.612862	0.712149	0.607937	0.416714	0.548906	0.764271	0.716636	0.674595	0.710909	0.673072	0.702262	0.779486	0.6013	0.62523	-0.00356665	-0.0511918	0.611686	0.347538	0.594099
TCGA.25.2409.01	cluster6	0.36715	0.717052	0.484978	0.47446	0.375761	0.498309	0.464701	0.388077	0.388567	0.427456	0.398189	0.275784	0.400155	0.341052	0.0143738	0.68749	0.429172	0.333303	0.392637
TCGA.29.1690.01	cluster6	0.498032	0.443163	0.586652	0.415702	0.535483	0.536167	0.551167	0.627549	0.552557	0.433292	0.498054	0.593684	0.383128	0.661477	-0.16526	0.659882	0.616513	0.0124474	0.487818
TCGA.29.1710.01	cluster6	0.763364	0.782367	0.725868	0.750889	0.691628	0.763296	0.786361	0.670467	0.739269	0.777018	0.77194	0.810537	0.678407	0.790204	-0.0378225	0.506169	0.698162	0.655199	0.708622
TCGA.29.1778.01	cluster6	0.233706	0.596975	0.183103	0.00553193	0.0128974	0.14167	0.517563	-0.183619	0.403322	0.425458	0.569248	0.500143	0.146771	0.176123	0.594881	-0.0499991	0.0155806	-0.0236129	0.234024
TCGA.29.1785.01	cluster6	0.536644	0.826242	0.58029	0.397692	0.500728	0.760493	0.766331	0.532428	0.700426	0.705972	0.764435	0.765617	0.607627	0.529988	-0.281714	-0.54641	0.560834	0.251808	0.5947
TCGA.29.2427.01	cluster6	0.759026	0.887429	0.677469	0.668024	0.716611	0.860823	0.869127	0.672149	0.79035	0.800949	0.812674	0.779167	0.814632	0.739999	-0.1999	0.434705	0.746667	0.673082	0.748808
TCGA.30.1860.01	cluster6	0.473968	0.876018	0.582363	0.554634	0.47007	0.575465	0.789805	0.620877	0.700894	0.689507	0.753668	0.75022	0.583628	0.523419	-0.00414067	0.286609	0.518346	0.522796	0.576993
TCGA.30.1880.01	cluster6	0.372866	0.569485	0.110331	0.138934	-0.112474	-0.00108018	0.382689	0.0804097	0.380857	0.421495	0.422702	0.410551	-0.0108029	0.13851	-0.251729	0.574622	0.102623	-0.204873	0.177577
TCGA.30.1887.01	cluster6	0.603766	0.755858	0.608608	0.554706	0.453734	0.649044	0.709322	0.673034	0.725824	0.697168	0.739089	0.735004	0.535721	0.59413	0.384494	0.768587	0.564182	0.457066	0.595963
TCGA.31.1950.01	cluster6	0.250802	-0.0113844	0.211185	-0.174014	0.210176	0.378921	0.135708	0.18195	0.179525	0.0912068	0.186636	0.00108126	0.33227	0.211202	0.046151	-0.747399	0.163831	0.173124	0.228221
TCGA.36.1569.01	cluster6	0.539141	0.484294	0.557233	0.549581	0.361546	0.624429	0.630969	0.527089	0.665511	0.651424	0.571842	0.680595	0.370674	0.540017	-0.072327	0.719376	0.493834	0.535869	0.534831
TCGA.36.1578.01	cluster6	0.389368	0.724863	0.455544	0.284554	0.429288	0.359854	0.679731	0.459444	0.546272	0.594899	0.484115	0.53503	0.47947	0.429457	-0.0918854	-0.605073	0.477385	-0.0407592	0.454274
TCGA.36.1581.01	cluster6	0.715586	0.613096	0.556284	0.536458	0.427527	0.704049	0.63063	0.484093	0.700482	0.648071	0.659641	0.730439	0.485583	0.490509	0.276087	-0.196259	0.407894	0.573771	0.525826
TCGA.36.2539.01	cluster6	0.38597	0.747079	0.403661	0.470242	0.382979	0.574754	0.601599	0.274295	0.423947	0.457488	0.44139	0.348596	0.343243	0.433597	0.0861097	0.572433	0.424174	0.165682	0.407402
TCGA.42.2593.01	cluster6	0.79943	0.637384	0.764751	0.811471	0.745093	0.837426	0.678979	0.619146	0.751526	0.75312	0.73384	0.835955	0.818707	0.788236	0.592871	-0.416723	0.727676	0.761839	0.725689
TCGA.61.1721.01	cluster6	0.10954	0.44742	0.241421	0.163457	-0.092104	-0.36765	0.327578	0.423428	0.34541	0.282519	0.315246	0.320641	-0.0968366	0.217352	0.930859	0.776827	0.283171	-0.383001	0.194453
TCGA.61.1727.01	cluster6	0.584658	0.860063	0.697029	0.62904	0.581082	0.759111	0.783042	0.562393	0.780563	0.741428	0.853151	0.792335	0.647147	0.608711	-0.224945	-0.189092	0.604759	0.364105	0.649877
TCGA.61.1907.01	cluster6	0.603433	0.714345	0.561713	0.451398	0.453988	0.699711	0.720963	0.473282	0.724268	0.666012	0.739017	0.758106	0.512273	0.54107	0.226249	-0.649711	0.453921	0.189041	0.536476
TCGA.61.1917.01	cluster6	0.0910438	0.400423	0.406244	0.200864	0.300839	0.0943983	0.230949	0.182287	0.223507	0.224957	0.148641	0.4943	0.322728	0.417575	-0.125156	0.0828994	0.289764	0.0687756	0.246315
TCGA.61.2017.01	cluster6	-0.163597	0.180862	-0.195545	-0.0616895	-0.35761	-0.460407	0.106308	0.270395	0.0117755	0.0255298	-0.0212656	-0.0336023	-0.335565	-0.359852	-0.0242105	-0.000914305	-0.158684	-0.00980479	-0.139081
TCGA.61.2111.01	cluster6	0.329042	0.183065	0.230177	0.0142898	0.278072	-0.316519	0.255617	0.0832021	0.000472972	0.138898	0.174638	0.266683	0.212811	0.336423	-0.0563246	-0.0408674	0.081833	-0.0546089	0.0934373
TCGA.04.1356.01	cluster7	-0.117119	-0.331118	-0.33167	-0.270008	-0.243549	-0.000768248	-0.305228	-0.245523	-0.200111	-0.173053	-0.286506	-0.0383177	-0.142435	-0.336954	-0.0248581	0.218178	-0.284339	-0.112242	-0.246032
TCGA.04.1365.01	cluster7	0.0679189	0.629283	0.565253	0.428398	0.539077	0.459246	0.577171	0.565506	0.493312	0.554071	0.64	0.565363	0.58345	0.603008	-0.0286018	-0.456355	0.484465	0.492893	0.487861
TCGA.09.1659.01	cluster7	0.00185691	-0.0452545	-0.121211	0.103244	-0.211469	-0.0392372	-0.0473426	-0.0915595	-0.259496	-0.248086	-0.23489	-0.419448	-0.275317	-0.28678	0.292453	0.320029	-0.0805913	0.109025	-0.214794
TCGA.09.1666.01	cluster7	0.105696	0.02451	0.0552582	-0.029847	0.0899911	0.034028	0.222796	-0.309837	0.0238371	-0.0274363	0.165045	-0.157597	0.0465191	-0.0808974	-0.198273	-0.609933	-0.144273	0.00540226	0.0327951
TCGA.09.1667.01	cluster7	0.342399	0.781776	0.505709	0.393924	0.383791	0.51531	0.707588	0.596729	0.502902	0.530803	0.700158	0.547357	0.428601	0.344389	-0.108286	0.0552739	0.368808	0.610916	0.458656
TCGA.09.1668.01	cluster7	0.308593	0.68589	0.6192	0.532395	0.490483	0.444053	0.648368	0.367983	0.530794	0.572618	0.594626	0.696423	0.543274	0.454478	0.0117044	-0.000357641	0.379071	0.529063	0.488332
TCGA.10.0930.01	cluster7	0.548109	0.781702	0.390444	0.511442	0.440221	0.442127	0.594316	0.471748	0.516574	0.503084	0.566823	0.535463	0.303411	0.3455	-0.137776	0.12197	0.467994	0.0289229	0.447489
TCGA.13.0723.01	cluster7	0.500764	0.806407	0.586137	0.354057	0.549406	0.652247	0.697556	0.529129	0.674996	0.653337	0.67385	0.656511	0.56747	0.580921	-0.431654	-0.589643	0.581874	0.300763	0.571679
TCGA.13.0768.01	cluster7	0.704484	0.91873	0.728432	0.753326	0.651212	0.712731	0.853721	0.610575	0.78957	0.782735	0.824995	0.819753	0.691981	0.65328	0.859066	0.718719	0.688914	0.634085	0.70971
TCGA.13.0886.01	cluster7	0.613253	0.606879	0.56363	0.659295	0.534337	0.610321	0.614138	0.293025	0.572556	0.656332	0.599745	0.557389	0.55632	0.626347	0.753698	0.657645	0.568587	0.549259	0.569094
TCGA.13.0911.01	cluster7	0.443861	0.118307	0.706604	0.737283	0.745634	0.732737	0.231036	0.646861	0.373681	0.39888	0.173788	0.260367	0.697853	0.722934	0.387365	0.723296	0.718134	0.488643	0.567963
TCGA.13.1411.01	cluster7	0.746376	0.821398	0.768327	0.745849	0.739935	0.798421	0.770393	0.806509	0.727435	0.74126	0.781935	0.733081	0.726906	0.817951	0.794546	0.694607	0.802749	0.702567	0.715063
TCGA.13.1498.01	cluster7	0.414213	0.731178	0.433603	0.134573	0.231686	0.498099	0.60754	0.283384	0.505549	0.502169	0.531749	0.456431	0.41731	0.345702	-0.617206	-0.109228	0.0453807	0.327024	0.395918
TCGA.13.2061.01	cluster7	0.444386	0.742147	0.639185	0.563308	0.648425	0.631743	0.660114	0.684892	0.548518	0.568683	0.678455	0.641951	0.626548	0.656413	-0.373442	-0.518594	0.652809	0.475911	0.588254
TCGA.13.2065.01	cluster7	0.628407	0.655892	0.538438	0.583489	0.507463	0.66925	0.668563	0.459944	0.642691	0.669476	0.645846	0.686657	0.556683	0.439419	0.572031	0.428661	0.395459	0.597098	0.54264
TCGA.13.2066.01	cluster7	0.414186	-0.42446	0.470309	0.692374	0.585539	0.822114	0.230098	0.558494	0.261787	0.349163	0.0675094	0.105248	0.505331	0.522732	0.540256	0.59803	0.610142	0.431924	0.435002
TCGA.20.0987.01	cluster7	0.673198	0.838956	0.713556	0.681336	0.748281	0.795184	0.665331	0.782093	0.678764	0.684251	0.732284	0.648979	0.660097	0.726516	0.137066	-0.435688	0.753249	0.738681	0.700441
TCGA.20.0991.01	cluster7	0.706953	0.883164	0.772687	0.801931	0.776476	0.834067	0.849186	0.808731	0.80207	0.784634	0.897192	0.879966	0.771959	0.833327	0.133502	-0.721615	0.79787	0.81117	0.767891
TCGA.23.1026.01	cluster7	0.347623	0.81213	0.441187	0.542052	0.462702	0.428124	0.664055	0.535194	0.492482	0.49721	0.601125	0.553228	0.445382	0.484565	0.57308	0.18231	0.379944	0.488203	0.466394
TCGA.23.1116.01	cluster7	0.554061	0.313435	0.655114	0.730654	0.700496	0.723154	0.514851	0.830094	0.539031	0.552873	0.516218	0.453057	0.650857	0.788675	0.687397	0.654659	0.708727	0.363602	0.617572
TCGA.23.2641.01	cluster7	0.621427	0.520442	0.719022	0.699858	0.634819	0.526893	0.470593	0.731791	0.603975	0.617659	0.511516	0.617121	0.667224	0.755931	0.840784	0.735194	0.763421	0.471377	0.629307
TCGA.24.0980.01	cluster7	0.540653	0.711895	0.469448	0.477942	0.424981	0.127623	0.515829	0.373043	0.53024	0.523797	0.553763	0.539369	0.487799	0.350209	-0.624734	0.174411	0.461142	0.527478	0.507137
TCGA.24.1417.01	cluster7	0.65798	0.777482	0.633735	0.663009	0.515216	0.8285	0.757289	0.66055	0.658018	0.671144	0.717068	0.794572	0.623211	0.64929	0.66696	0.480985	0.551275	0.819358	0.621269
TCGA.24.1434.01	cluster7	0.300408	0.0683896	0.65264	0.59731	0.623777	0.683123	0.391741	0.616419	0.350732	0.43622	0.194727	0.196097	0.605928	0.736009	0.0263951	0.717646	0.720995	0.450466	0.529975
TCGA.24.1545.01	cluster7	0.658798	0.774639	0.62379	0.678792	0.535693	0.5901	0.707034	0.551296	0.680371	0.676393	0.720018	0.69213	0.569799	0.655303	-0.371208	0.571671	0.618652	0.675105	0.627915
TCGA.24.1847.01	cluster7	0.610655	0.970251	0.672683	0.765129	0.668764	0.680925	0.87002	0.68553	0.790572	0.815114	0.843792	0.776884	0.700798	0.715705	0.0842183	-0.277542	0.693134	0.504408	0.703356
TCGA.24.1849.01	cluster7	0.646081	0.833056	0.713059	0.687616	0.601117	0.619395	0.73329	0.724731	0.727356	0.749322	0.746361	0.760612	0.656157	0.651675	0.775472	0.675848	0.746951	0.434368	0.678677
TCGA.24.2035.01	cluster7	0.537104	0.727727	0.646931	0.696317	0.592415	0.574712	0.624696	0.751085	0.647801	0.651918	0.604087	0.649783	0.618214	0.634287	0.862858	0.71447	0.715931	0.502169	0.620074
TCGA.24.2281.01	cluster7	0.500188	0.747549	0.670641	0.623677	0.646875	0.600094	0.689809	0.650077	0.588007	0.640607	0.713803	0.713275	0.620245	0.614466	-0.573871	-0.249824	0.632633	0.546048	0.598398
TCGA.24.2288.01	cluster7	0.653596	0.77609	0.596729	0.601773	0.490088	0.587246	0.685291	0.417532	0.662035	0.641687	0.593891	0.677905	0.576461	0.431046	0.644455	0.0397388	0.462725	0.55841	0.546139
TCGA.24.2289.01	cluster7	0.526686	-0.459002	0.481609	0.665639	0.608621	0.738828	0.303471	0.552147	0.300602	0.371236	0.121276	0.02746	0.605419	0.453423	0.565462	0.471787	0.583862	0.465733	0.447866
TCGA.24.2290.01	cluster7	0.47925	-0.66362	0.597862	0.647526	0.684049	0.63922	-0.238173	0.648276	0.0720891	0.0789016	-0.237363	0.356752	0.643203	0.593962	0.43853	-0.340692	0.675746	0.194033	0.449587
TCGA.24.2293.01	cluster7	0.624489	0.537145	0.736544	0.704073	0.638347	0.56961	0.500864	0.778624	0.617128	0.61684	0.559119	0.604131	0.668274	0.713629	0.858235	0.732666	0.744769	0.49713	0.635471
TCGA.25.1322.01	cluster7	0.113923	-0.517826	0.282422	0.462928	0.407044	0.279614	-0.402745	0.463898	-0.311933	-0.357155	-0.27487	-0.4813	0.419959	0.444323	0.341732	0.156298	0.387914	0.197447	0.141769
TCGA.25.1623.01	cluster7	0.658518	0.80024	0.702768	0.736199	0.703023	0.782954	0.750495	0.794436	0.757382	0.727085	0.723221	0.785817	0.696869	0.721628	0.0832654	0.777365	0.661428	0.759288	0.689018
TCGA.25.1626.01	cluster7	0.657517	0.71669	0.655332	0.816343	0.703172	0.836662	0.722207	0.792326	0.692712	0.708298	0.643116	0.70589	0.686952	0.784406	0.694173	0.849839	0.739075	0.555313	0.675252
TCGA.25.1630.01	cluster7	0.594927	-0.0616586	0.543332	0.713316	0.583862	0.815848	0.193342	0.786799	0.221857	0.177217	0.214979	-0.0334292	0.536605	0.680139	0.442958	0.00955864	0.67901	0.0351507	0.482668
TCGA.25.1631.01	cluster7	-0.459071	-0.655393	-0.493156	-0.354674	-0.420325	-0.53227	-0.600198	-0.387047	-0.519025	-0.569633	-0.557327	-0.584618	-0.512243	-0.53693	0.3635	-0.0209145	-0.43087	0.210546	-0.458213
TCGA.25.1633.01	cluster7	0.169197	0.576182	0.451318	0.603233	0.217109	0.453493	0.529741	0.559579	0.505038	0.473555	0.491615	0.534912	0.288323	0.293035	0.461252	0.675796	0.376552	0.207172	0.406065
TCGA.25.2042.01	cluster7	0.447133	0.416552	0.55259	0.699091	0.48935	0.59766	0.393256	0.685449	0.486495	0.500057	0.341951	0.464897	0.405165	0.575831	0.934978	0.858536	0.628518	0.491831	0.504075
TCGA.29.1704.01	cluster7	0.727814	0.602543	0.60913	0.69232	0.613296	0.704695	0.643393	0.58831	0.617236	0.618627	0.676989	0.637417	0.70234	0.561061	0.0569593	-0.662561	0.525941	0.587731	0.598606
TCGA.29.1764.01	cluster7	0.445944	0.537643	0.52465	0.53515	0.406019	0.35134	0.579526	0.609174	0.520213	0.551779	0.546032	0.473936	0.450025	0.443378	0.726541	0.708596	0.453313	0.284875	0.46111
TCGA.30.1867.01	cluster7	0.594415	-0.212897	0.606776	0.765766	0.696951	0.703224	-0.10963	0.547709	0.42499	0.326246	0.000339059	0.357957	0.669633	0.726709	0.766636	0.811755	0.727296	0.26034	0.517687
TCGA.30.1891.01	cluster7	0.155573	0.304505	0.240052	0.423675	0.260321	0.165517	0.212607	0.46778	0.25042	0.292401	0.193002	0.144432	0.130756	0.427047	0.347098	0.727983	0.357351	0.184448	0.239379
TCGA.31.1944.01	cluster7	0.299891	-0.0832284	0.118858	0.395545	0.118197	0.144209	0.0914958	0.211077	0.157462	0.0827404	0.207427	0.128753	0.155447	-0.13939	0.77169	0.501684	0.182149	0.414695	0.140258
TCGA.31.1951.01	cluster7	0.504444	0.722121	0.605526	0.713801	0.59499	0.532586	0.62982	0.523742	0.59852	0.612285	0.6516	0.679895	0.655012	0.568436	0.278283	0.3317	0.621646	0.45981	0.579515
TCGA.31.1953.01	cluster7	0.808767	0.932857	0.746599	0.861991	0.703392	0.898485	0.906265	0.698966	0.772432	0.86136	0.88584	0.787357	0.685106	0.765901	0.322356	0.170019	0.787432	0.503972	0.733929
TCGA.31.1956.01	cluster7	0.782696	0.959781	0.819728	0.805054	0.801551	0.87886	0.880245	0.802047	0.850288	0.866991	0.871308	0.891209	0.771556	0.82608	0.838721	0.582502	0.814302	0.709357	0.791809
TCGA.31.1959.01	cluster7	0.628047	0.51379	0.601813	0.705147	0.606514	0.543027	0.43843	0.676373	0.560805	0.537134	0.531299	0.514676	0.579809	0.655918	0.653389	0.748912	0.600561	0.330661	0.549287
TCGA.36.1568.01	cluster7	0.462744	0.227689	0.208365	-0.0660126	0.0991552	0.641562	0.359058	-0.0121516	0.256235	0.270316	0.109264	0.301763	0.234155	0.209634	-0.372995	0.080777	0.202232	0.323401	0.242889
TCGA.36.1574.01	cluster7	-0.195893	0.0616255	0.253996	0.126102	0.161081	0.558844	-0.103581	0.175131	0.13819	-0.163417	0.0857079	0.0567749	0.22628	0.153972	0.334627	0.588554	-0.215011	0.37881	0.123455
TCGA.36.1580.01	cluster7	0.368856	0.424226	0.462798	0.498827	0.395318	0.481833	0.494446	0.490198	0.395585	0.453749	0.345308	0.370869	0.351144	0.435671	-0.284639	0.78217	0.445056	0.572101	0.416123
TCGA.36.2529.01	cluster7	0.635485	0.586837	0.57451	0.696734	0.606588	0.674533	0.679477	0.624822	0.641407	0.64548	0.676744	0.615417	0.642455	0.560537	0.246635	-0.63004	0.583264	0.543093	0.609827
TCGA.36.2545.01	cluster7	-0.102482	0.649105	0.0128016	-0.196472	-0.329528	-0.043139	0.509248	0.250054	0.0646387	0.101894	0.298704	0.0889165	0.0652446	-0.245966	-0.737091	-0.65635	-0.303408	0.390179	-0.0796192
TCGA.59.2354.01	cluster7	0.386344	0.808981	0.51289	0.568187	0.527273	0.66398	0.678459	0.484765	0.641766	0.680657	0.62847	0.73201	0.503401	0.625829	0.582513	0.699877	0.611488	0.556631	0.575325
TCGA.61.1722.01	cluster7	0.580168	0.840452	0.680523	0.659187	0.552239	0.762675	0.801738	0.552864	0.702515	0.705383	0.791758	0.749769	0.617963	0.611557	0.268834	0.425669	0.61333	0.614348	0.627469
TCGA.61.1895.01	cluster7	0.482005	0.605824	0.639566	0.700013	0.594097	0.57242	0.559679	0.746006	0.477819	0.485287	0.514997	0.494793	0.552832	0.684482	0.324064	0.0884382	0.603709	0.396053	0.533792
TCGA.61.1903.01	cluster7	0.497446	0.450676	0.481799	0.629975	0.446294	0.543281	0.537194	0.672	0.437662	0.43746	0.425959	0.541337	0.394953	0.551522	-0.016866	-0.49659	0.588784	0.413815	0.467434
TCGA.61.1919.01	cluster7	0.525138	0.441977	0.639896	0.742132	0.580331	0.762858	0.510388	0.616881	0.480648	0.48969	0.506221	0.55166	0.608764	0.662899	0.51528	0.730045	0.550221	0.717316	0.53364
TCGA.61.2000.01	cluster7	0.0656355	0.551154	0.0454654	0.486364	0.196521	-0.0392967	0.283964	0.242402	0.0849368	0.0490136	0.242286	0.193673	0.103375	0.149367	0.0296034	-0.223173	0.0295567	0.114202	0.0709814
TCGA.61.2002.01	cluster7	0.659523	0.82971	0.707647	0.68519	0.635844	0.795206	0.785331	0.676989	0.711412	0.694122	0.75308	0.748153	0.692832	0.682676	0.142679	0.530917	0.697503	0.540627	0.684139
TCGA.61.2012.01	cluster7	0.629353	0.651409	0.589757	0.587316	0.569588	0.640005	0.584112	0.633109	0.629735	0.539111	0.627698	0.715152	0.626485	0.586554	-0.417188	-0.52185	0.555686	0.467346	0.542824
TCGA.61.2094.01	cluster7	0.745662	0.933439	0.823709	0.679994	0.684463	0.829252	0.856176	0.630836	0.844565	0.835963	0.866158	0.865227	0.736966	0.714693	-0.167203	-0.614643	0.709503	0.786169	0.761291
TCGA.61.2095.01	cluster7	0.585234	0.745458	0.534422	0.599011	0.580213	0.416952	0.412731	0.573018	0.350389	0.391164	0.385159	0.147931	0.43816	0.617817	0.0667711	0.383624	0.67674	-0.10763	0.45722
TCGA.61.2097.01	cluster7	0.432685	-0.68046	0.335525	0.718734	0.413583	0.518467	-0.382441	0.514143	-0.291705	-0.333939	-0.383411	-0.346499	0.422126	0.354829	0.391261	0.222792	0.544305	0.152913	0.233025
TCGA.04.1332.01	cluster8	-0.170647	-0.634074	-0.258848	0.183821	-0.354047	-0.392616	-0.52509	-0.0951598	-0.402413	-0.203453	-0.446814	-0.555983	-0.433163	-0.260487	0.750612	0.702641	-0.100182	-0.0236025	-0.281842
TCGA.04.1341.01	cluster8	-0.580205	-0.592519	-0.644092	-0.644948	-0.452283	-0.712505	-0.451781	-0.703051	-0.587048	-0.536637	-0.516026	-0.567723	-0.437323	-0.590088	-0.716692	-0.0951462	-0.644897	-0.0745098	-0.52356
TCGA.04.1517.01	cluster8	-0.448514	-0.750042	-0.562173	-0.576833	-0.425479	-0.143238	-0.619667	-0.490471	-0.50328	-0.573215	-0.679087	-0.648217	-0.460149	-0.481889	-0.492572	-0.0839862	-0.272275	-0.171795	-0.474713
TCGA.04.1651.01	cluster8	-0.0789458	-0.119329	-0.425503	-0.332083	-0.386455	-0.631792	-0.30423	-0.569849	-0.328902	-0.430543	-0.302325	-0.274907	-0.359709	-0.512696	-0.25043	-0.364081	-0.500578	0.142984	-0.365627
TCGA.10.0928.01	cluster8	-0.292205	-0.701512	-0.590143	-0.527171	-0.597692	-0.626907	-0.611481	-0.643785	-0.59987	-0.619141	-0.700698	-0.568665	-0.654345	-0.611082	0.0496348	-0.591975	-0.618687	-0.317261	-0.570834
TCGA.10.0933.01	cluster8	-0.326233	-0.297903	-0.611147	-0.572698	-0.666456	-0.625012	-0.353077	-0.553213	-0.467292	-0.516328	-0.459522	-0.410385	-0.586523	-0.571803	0.400029	0.174022	-0.505258	-0.542301	-0.495337
TCGA.13.0717.01	cluster8	-0.597139	-0.699019	-0.605804	-0.634562	-0.544465	-0.617772	-0.718071	-0.566036	-0.662653	-0.654646	-0.635089	-0.647164	-0.624039	-0.611615	-0.50782	-0.450846	-0.615347	-0.505732	-0.604138
TCGA.13.0888.01	cluster8	-0.736406	-0.649244	-0.714336	-0.827771	-0.648564	-0.684433	-0.651404	-0.736801	-0.637674	-0.572993	-0.629685	-0.581446	-0.65574	-0.694699	-0.217465	-0.0571334	-0.680357	-0.67828	-0.6294
TCGA.13.0891.01	cluster8	-0.52858	-0.344998	-0.539435	-0.443143	-0.456909	-0.408352	-0.295293	-0.513563	-0.461481	-0.500724	-0.493065	-0.512405	-0.393047	-0.540387	-0.21012	-0.531982	-0.527876	-0.45172	-0.456161
TCGA.13.1481.01	cluster8	-0.0808808	0.0531631	-0.0773476	0.02958	-0.334658	-0.0534161	-0.0486823	-0.363677	0.118037	0.0802099	-0.11148	0.301299	-0.12753	-0.346394	0.321202	0.783518	-0.381557	0.62311	-0.11325
TCGA.13.1485.01	cluster8	-0.369923	-0.804304	-0.333753	-0.199994	-0.231502	-0.355397	-0.649713	-0.319921	-0.552699	-0.551545	-0.664405	-0.639292	-0.343342	-0.138546	0.41428	0.793647	-0.326623	0.0474897	-0.369446
TCGA.13.1487.01	cluster8	-0.513625	-0.739405	-0.560977	-0.54193	-0.60307	-0.74916	-0.626101	-0.644759	-0.6335	-0.620133	-0.67263	-0.66231	-0.653363	-0.650256	-0.308512	0.388632	-0.652225	-0.0407982	-0.567761
TCGA.13.1492.01	cluster8	-0.502308	-0.505538	-0.543523	-0.547252	-0.510878	-0.636643	-0.450249	-0.643566	-0.463516	-0.485328	-0.420174	-0.276739	-0.352434	-0.41517	-0.441036	-0.0910695	-0.595087	-0.556327	-0.514865
TCGA.13.1501.01	cluster8	-0.48678	-0.666379	-0.437	-0.357267	-0.260834	-0.463535	-0.52187	-0.552337	-0.482235	-0.456299	-0.428768	-0.506291	-0.450556	-0.39485	0.248059	0.640604	-0.43772	0.390922	-0.36931
TCGA.13.1512.01	cluster8	-0.216542	0.0870294	0.171892	-0.162112	0.316945	0.37044	-0.037507	-0.146661	-0.212168	0.00908526	0.0107463	-0.0727466	0.345166	0.314455	0.0417982	0.428887	-0.0769811	0.563584	-0.0213693
TCGA.23.1114.01	cluster8	-0.595659	-0.704002	-0.535444	-0.606058	-0.559924	-0.699743	-0.670095	-0.644827	-0.670869	-0.698033	-0.684858	-0.707087	-0.595458	-0.675646	-0.100673	0.222515	-0.552746	-0.693307	-0.609597
TCGA.23.1121.01	cluster8	-0.421025	-0.423284	-0.50949	-0.577348	-0.438949	-0.464836	-0.523644	-0.530413	-0.492662	-0.439913	-0.532117	-0.449643	-0.476085	-0.454323	-0.705056	-0.392146	-0.564892	0.00372493	-0.486754
TCGA.23.1122.01	cluster8	-0.215892	-0.589966	-0.30222	-0.254988	-0.0538241	-0.460477	-0.447761	-0.0594862	-0.452566	-0.426246	-0.540621	-0.546156	-0.151241	-0.188388	-0.280338	-0.416745	-0.17441	-0.150986	-0.270232
TCGA.24.0970.01	cluster8	-0.263137	-0.660113	-0.347495	-0.202065	-0.00536021	-0.226619	-0.550874	-0.339887	-0.439742	-0.399594	-0.54905	-0.369827	-0.131394	-0.0492927	-0.0624896	0.469584	-0.179257	-0.0247878	-0.314934
TCGA.24.1567.01	cluster8	-0.623145	-0.592036	-0.628751	-0.46277	-0.54845	-0.614658	-0.565336	-0.655209	-0.582561	-0.552265	-0.557966	-0.544433	-0.616533	-0.523912	-0.558861	-0.371905	-0.60389	-0.601572	-0.527811
TCGA.24.1850.01	cluster8	0.148441	0.033987	0.229775	0.121523	0.404517	0.308828	-0.114162	0.223381	0.0480536	-0.0572779	0.00177919	0.157679	0.402082	0.32664	-0.295552	0.17824	0.161619	0.303451	0.152039
TCGA.24.2019.01	cluster8	-0.427842	0.339618	-0.218392	-0.136334	-0.367741	-0.473489	-0.118691	-0.306384	-0.0363743	-0.0934768	0.0335433	-0.135594	-0.226496	-0.38572	0.0657356	-0.171889	-0.325991	-0.476894	-0.223485
TCGA.24.2020.01	cluster8	-0.372134	-0.538553	-0.493313	-0.421784	-0.548442	-0.461317	-0.570806	-0.596872	-0.605336	-0.542128	-0.541591	-0.561286	-0.58295	-0.401433	0.228474	-0.344911	-0.523673	-0.342798	-0.521379
TCGA.24.2030.01	cluster8	-0.510139	-0.225246	-0.346847	-0.593733	-0.0782816	-0.595698	-0.514949	-0.440593	-0.394419	-0.427821	-0.369957	-0.315323	-0.365671	-0.335481	0.0413894	-0.340728	-0.274115	-0.219553	-0.383386
TCGA.24.2297.01	cluster8	-0.626922	-0.615184	-0.644885	-0.623536	-0.539504	-0.64473	-0.560964	-0.727723	-0.563326	-0.58737	-0.569914	-0.607036	-0.495993	-0.52409	0.364855	-0.355712	-0.632852	0.00581052	-0.542229
TCGA.25.1317.01	cluster8	-0.229223	-0.648089	-0.579814	-0.412767	-0.598205	-0.606706	-0.568884	-0.553011	-0.537535	-0.515026	-0.588771	-0.544156	-0.510318	-0.594187	-0.344004	0.336644	-0.542498	-0.10332	-0.514966
TCGA.29.1698.01	cluster8	0.133888	-0.454793	-0.0342139	0.173574	-0.209632	-0.24208	-0.309039	-0.14569	-0.139788	-0.15288	-0.0747749	-0.00893365	-0.0331411	-0.387297	0.654459	0.561023	-0.305452	-0.050601	-0.172623
TCGA.29.1705.01	cluster8	0.155085	-0.548159	0.0171269	0.325572	0.320254	0.333148	-0.286747	0.0457865	-0.0362544	-0.104255	-0.182609	-0.122659	0.280775	0.250317	0.6458	0.525081	0.367057	-0.129315	0.135612
TCGA.29.1763.01	cluster8	-0.145462	-0.377199	-0.0266926	-0.146408	-0.251109	-0.194596	-0.193726	-0.0525638	-0.386191	-0.228026	-0.130537	-0.427751	-0.20795	-0.0256777	0.260999	-0.0395734	0.0476783	-0.24245	-0.218145
TCGA.29.1770.01	cluster8	-0.543048	-0.457462	-0.365788	0.024117	-0.257137	-0.372703	-0.374301	-0.222537	-0.481306	-0.372987	-0.268701	-0.555607	-0.405614	-0.164536	0.733757	0.694004	-0.198139	-0.306968	-0.372304
TCGA.30.1718.01	cluster8	0.460414	0.03648	0.32873	0.158355	0.427215	0.25118	0.137296	0.00973604	0.370835	0.305286	0.220364	0.311831	0.346688	0.185611	0.363399	0.630684	0.219808	0.474424	0.320285
TCGA.30.1861.01	cluster8	-0.459055	-0.671597	-0.510291	-0.389165	-0.392872	0.0233108	-0.537885	-0.564762	-0.539512	-0.548723	-0.508483	-0.543322	-0.414572	-0.415743	-0.113262	0.751646	-0.406485	-0.263568	-0.461299
TCGA.36.1577.01	cluster8	-0.439387	-0.689712	-0.579657	-0.375838	-0.513209	-0.478806	-0.645005	-0.0855396	-0.593687	-0.58727	-0.646022	-0.5913	-0.574726	-0.477667	-0.301043	-0.0519567	-0.511402	-0.433645	-0.547977
TCGA.59.2363.01	cluster8	-0.384104	-0.652394	-0.524152	-0.0492644	-0.4966	-0.646417	-0.53692	-0.316709	-0.585784	-0.574846	-0.619357	-0.517208	-0.49002	-0.606509	-0.148333	-0.304105	-0.474294	-0.391727	-0.508084
TCGA.61.1743.01	cluster8	-0.379519	-0.713339	-0.540489	-0.418789	-0.499822	-0.633153	-0.681317	-0.640016	-0.539014	-0.597934	-0.617844	-0.540388	-0.3947	-0.618253	-0.0909661	-0.46196	-0.573323	-0.396382	-0.516855
TCGA.61.2098.01	cluster8	-0.552007	-0.81069	-0.67176	-0.648615	-0.625733	-0.821081	-0.796513	-0.663531	-0.691344	-0.685555	-0.742708	-0.739174	-0.647296	-0.718338	-0.275058	-0.398503	-0.690682	-0.607533	-0.650179
TCGA.61.2101.01	cluster8	-0.518084	-0.718262	-0.467179	-0.573944	-0.332313	-0.626494	-0.674647	-0.580269	-0.553338	-0.534103	-0.630381	-0.509729	-0.418506	-0.513155	-0.284897	0.405854	-0.501743	-0.206135	-0.483661
TCGA.61.2611.02	cluster8	-0.543347	-0.666881	-0.614646	-0.572969	-0.516856	-0.537544	-0.714942	-0.696848	-0.572478	-0.626698	-0.580582	-0.546866	-0.510858	-0.539323	-0.00759095	-0.485523	-0.666143	-0.031333	-0.563097
TCGA.04.1347.01	cluster9	-0.665018	-0.613232	-0.631665	-0.699439	-0.655495	-0.80773	-0.627969	-0.562745	-0.590671	-0.597256	-0.610867	-0.639301	-0.618506	-0.672962	-0.602004	-0.33299	-0.671587	-0.618059	-0.612461
TCGA.04.1350.01	cluster9	-0.68122	-0.52013	-0.700246	-0.754174	-0.632295	-0.760864	-0.537115	-0.64788	-0.622011	-0.567177	-0.56204	-0.593871	-0.67978	-0.707078	-0.783974	-0.652166	-0.680449	-0.597772	-0.648428
TCGA.04.1351.01	cluster9	-0.543326	-0.479724	-0.515266	-0.518223	-0.537798	-0.634102	-0.443355	-0.628671	-0.41558	-0.428516	-0.494904	-0.412073	-0.525524	-0.556131	0.343659	0.27739	-0.556379	-0.296495	-0.490544
TCGA.04.1364.01	cluster9	-0.664722	-0.81652	-0.771249	-0.821475	-0.775549	-0.904309	-0.725876	-0.780435	-0.771136	-0.718173	-0.672114	-0.792065	-0.723146	-0.779938	-0.644243	-0.681798	-0.705658	-0.602191	-0.700337
TCGA.04.1371.01	cluster9	-0.587359	-0.717003	-0.710599	-0.697424	-0.688484	-0.803988	-0.583119	-0.684775	-0.525286	-0.527918	-0.526785	-0.585344	-0.681816	-0.638196	-0.652224	-0.342936	-0.693729	-0.454318	-0.591271
TCGA.04.1514.01	cluster9	-0.708081	-0.748213	-0.708981	-0.695799	-0.736474	-0.851433	-0.657517	-0.631309	-0.671423	-0.642939	-0.716249	-0.736365	-0.689754	-0.754725	-0.100325	-0.414298	-0.707508	-0.604573	-0.667759
TCGA.04.1542.01	cluster9	-0.552372	-0.776627	-0.662981	-0.702418	-0.610075	-0.824971	-0.6549	-0.647563	-0.571565	-0.59723	-0.593183	-0.582553	-0.606965	-0.699511	-0.568121	-0.488	-0.641991	-0.444932	-0.570441
TCGA.04.1644.01	cluster9	-0.570495	-0.557563	-0.545835	-0.537653	-0.598306	-0.683673	-0.626986	-0.493933	-0.622783	-0.592044	-0.646208	-0.572612	-0.6227	-0.573901	-0.553408	-0.144502	-0.617662	-0.626546	-0.581629
TCGA.04.1646.01	cluster9	-0.503577	-0.485075	-0.625497	-0.625969	-0.509501	-0.822393	-0.571944	-0.458572	-0.543027	-0.489683	-0.50108	-0.571424	-0.546316	-0.591374	-0.28359	-0.753758	-0.520659	-0.514108	-0.506395
TCGA.09.0364.01	cluster9	-0.563389	-0.589477	-0.698077	-0.654286	-0.650202	-0.74865	-0.644284	-0.73271	-0.660543	-0.673001	-0.62155	-0.699461	-0.694894	-0.645794	-0.52719	-0.254205	-0.701813	-0.637633	-0.650587
TCGA.09.0365.01	cluster9	-0.688218	-0.484228	-0.603606	-0.778199	-0.568639	-0.751099	-0.56957	-0.60191	-0.480025	-0.519566	-0.51317	-0.605604	-0.563338	-0.536398	-0.283771	-0.027595	-0.591826	-0.636117	-0.54484
TCGA.09.0369.01	cluster9	-0.612084	-0.638358	-0.44255	-0.557542	-0.465621	-0.561227	-0.662736	-0.576517	-0.59577	-0.574485	-0.563108	-0.685435	-0.501486	-0.383364	0.651967	0.343183	-0.495616	-0.637297	-0.513362
TCGA.09.1664.01	cluster9	-0.437701	-0.638286	-0.593646	-0.542812	-0.657198	-0.592356	-0.632657	-0.61424	-0.540843	-0.594987	-0.576665	-0.483704	-0.663008	-0.696368	-0.350813	-0.314087	-0.615555	-0.320184	-0.56699
TCGA.09.1673.01	cluster9	-0.444787	-0.392376	-0.271476	-0.251762	-0.110471	-0.378051	-0.423417	-0.039431	-0.373965	-0.350667	-0.384444	-0.530599	-0.280438	-0.23369	0.556165	-0.766761	-0.0980936	-0.338685	-0.279683
TCGA.09.1674.01	cluster9	-0.618108	-0.794665	-0.663928	-0.62068	-0.671602	-0.626649	-0.728026	-0.679382	-0.637056	-0.677948	-0.692847	-0.78683	-0.678378	-0.689115	-0.440876	-0.396309	-0.669166	-0.623369	-0.636512
TCGA.09.2048.01	cluster9	-0.582176	-0.636657	-0.593036	-0.574277	-0.617051	-0.626921	-0.643077	-0.480071	-0.593548	-0.572677	-0.643693	-0.575336	-0.645856	-0.628689	-0.597103	-0.0528289	-0.660974	-0.579646	-0.603822
TCGA.09.2054.01	cluster9	-0.134529	-0.417166	-0.350987	-0.301664	-0.467302	-0.529586	-0.532422	-0.469136	-0.43007	-0.392288	-0.384507	-0.479997	-0.371276	-0.509982	0.652028	0.209542	-0.418147	-0.215674	-0.430532
TCGA.10.0934.01	cluster9	-0.36907	-0.617868	-0.6584	-0.660616	-0.500809	-0.701055	-0.706437	-0.744869	-0.609407	-0.621138	-0.702888	-0.652878	-0.616377	-0.662481	-0.372948	-0.445495	-0.57716	-0.117453	-0.572266
TCGA.10.0938.01	cluster9	-0.659781	-0.599446	-0.691197	-0.623444	-0.651423	-0.706365	-0.56818	-0.680086	-0.560124	-0.571256	-0.533857	-0.49887	-0.572371	-0.684962	-0.635097	-0.679412	-0.662181	-0.43855	-0.589568
TCGA.13.0727.01	cluster9	-0.331668	-0.692743	-0.23518	-0.378595	-0.25415	-0.569545	-0.636928	-0.306368	-0.396699	-0.454468	-0.487121	-0.439954	-0.309267	-0.264848	-0.629517	-0.383039	0.0815745	-0.559051	-0.34236
TCGA.13.0794.01	cluster9	-0.632023	-0.578881	-0.513962	-0.755413	-0.476098	-0.772495	-0.611357	-0.477972	-0.495037	-0.545012	-0.465053	-0.5773	-0.487474	-0.592395	-0.201485	-0.544655	-0.547474	-0.663708	-0.530404
TCGA.13.0800.01	cluster9	-0.791849	-0.768406	-0.764234	-0.80484	-0.740596	-0.893562	-0.732582	-0.714172	-0.683867	-0.713006	-0.706125	-0.761021	-0.760739	-0.799779	-0.667324	-0.569038	-0.753275	-0.628619	-0.680474
TCGA.13.0802.01	cluster9	-0.647797	-0.713894	-0.690576	-0.718524	-0.609121	-0.602576	-0.710038	-0.593637	-0.662734	-0.671961	-0.660664	-0.720497	-0.664039	-0.590939	-0.359359	-0.52212	-0.658666	-0.394536	-0.631586
TCGA.13.0913.01	cluster9	-0.592872	-0.76339	-0.651966	-0.676751	-0.535347	-0.639053	-0.671421	-0.722957	-0.682625	-0.6383	-0.717646	-0.641204	-0.501007	-0.708914	-0.540822	-0.588326	-0.684095	-0.13332	-0.604459
TCGA.13.0920.01	cluster9	-0.493403	-0.424653	-0.562294	-0.61883	-0.519716	-0.65414	-0.521002	-0.642183	-0.463301	-0.517723	-0.501539	-0.381321	-0.450429	-0.696431	-0.461291	-0.262485	-0.623126	-0.356305	-0.515845
TCGA.13.1407.01	cluster9	-0.566471	-0.548094	-0.598945	-0.733444	-0.703597	-0.744296	-0.545824	-0.561327	-0.506596	-0.517231	-0.52869	-0.404289	-0.644808	-0.678289	-0.560973	0.0309415	-0.580921	-0.733046	-0.554649
TCGA.13.1409.01	cluster9	-0.636955	-0.569666	-0.697264	-0.761262	-0.636728	-0.705641	-0.560154	-0.642411	-0.543641	-0.568012	-0.630076	-0.72383	-0.657312	-0.702856	-0.687255	0.148982	-0.629279	-0.541469	-0.597007
TCGA.13.1477.01	cluster9	-0.616112	-0.63745	-0.61757	-0.62121	-0.602232	-0.788516	-0.610173	-0.65031	-0.615677	-0.598991	-0.619383	-0.668336	-0.604859	-0.671846	-0.578935	0.401023	-0.585747	-0.555591	-0.579363
TCGA.13.1489.01	cluster9	-0.586831	-0.768086	-0.63624	-0.715299	-0.504914	-0.579304	-0.628006	-0.697647	-0.620855	-0.616727	-0.731344	-0.606801	-0.474205	-0.637424	-0.622497	-0.523094	-0.633962	-0.214204	-0.584464
TCGA.20.0990.01	cluster9	-0.469495	-0.389017	-0.563855	-0.486114	-0.550734	-0.65355	-0.524926	-0.660543	-0.505216	-0.455024	-0.401418	-0.532306	-0.526357	-0.60007	-0.311767	-0.614904	-0.557914	-0.469198	-0.517847
TCGA.20.1683.01	cluster9	-0.274583	-0.246771	-0.426853	-0.324118	-0.353388	-0.0848102	-0.364824	-0.331966	-0.20036	-0.251148	-0.218985	-0.294968	-0.378153	-0.349813	-0.43621	-0.277385	-0.377036	0.56839	-0.307918
TCGA.20.1684.01	cluster9	-0.671259	-0.823916	-0.68384	-0.665199	-0.651295	-0.780545	-0.678812	-0.684962	-0.628775	-0.668626	-0.661055	-0.692706	-0.613497	-0.709461	-0.658217	-0.650195	-0.708518	-0.671493	-0.644858
TCGA.20.1685.01	cluster9	0.0260215	-0.352288	0.488562	0.522621	0.478513	0.486927	-0.182441	0.47118	0.200137	0.0784505	-0.00886667	0.233481	0.364548	0.564275	-0.310003	-0.563793	0.566965	0.382875	0.329723
TCGA.20.1686.01	cluster9	-0.0754657	-0.282509	-0.41068	-0.264516	-0.421035	-0.588242	-0.493664	-0.417759	-0.197224	-0.375457	-0.290798	-0.238609	-0.455996	-0.429823	0.741435	0.231085	-0.350893	0.102892	-0.294162
TCGA.23.1022.01	cluster9	-0.433027	-0.599996	-0.576952	-0.589912	-0.56616	-0.571289	-0.537933	-0.520134	-0.494021	-0.480824	-0.529428	-0.485974	-0.559157	-0.53482	-0.424067	-0.328169	-0.503471	-0.5152	-0.492378
TCGA.23.1024.01	cluster9	-0.321655	-0.612706	-0.452446	-0.585394	-0.53384	-0.601673	-0.468999	-0.635244	-0.401599	-0.442237	-0.278714	-0.437775	-0.413003	-0.509432	-0.584844	-0.688694	-0.551279	-0.430245	-0.462249
TCGA.23.1107.01	cluster9	-0.512066	-0.505069	-0.462129	-0.464937	-0.292803	-0.652012	-0.435288	-0.524804	-0.499092	-0.386924	-0.408618	-0.436298	-0.397751	-0.484696	-0.279001	-0.638108	-0.516021	0.403012	-0.431099
TCGA.23.1110.01	cluster9	-0.673785	-0.629992	-0.60828	-0.718109	-0.693754	-0.746988	-0.578837	-0.661759	-0.578945	-0.586999	-0.619701	-0.540901	-0.657285	-0.714872	-0.257697	-0.168138	-0.641476	-0.627683	-0.629107
TCGA.23.1113.01	cluster9	-0.635987	-0.652896	-0.680859	-0.577652	-0.526577	-0.656585	-0.604679	-0.505593	-0.62385	-0.551801	-0.601992	-0.684918	-0.570392	-0.560792	-0.646585	0.0158223	-0.415187	-0.346729	-0.555009
TCGA.23.1809.01	cluster9	-0.420607	-0.423618	-0.40215	-0.484343	-0.39299	-0.323384	-0.543396	-0.37116	-0.444935	-0.53055	-0.412205	-0.566349	-0.340692	-0.390009	-0.300797	-0.191795	-0.475301	-0.586081	-0.43393
TCGA.24.1103.01	cluster9	-0.561295	-0.428984	-0.577009	-0.551148	-0.437342	-0.597227	-0.500083	-0.648362	-0.531237	-0.546234	-0.469673	-0.582913	-0.545466	-0.612362	0.0819504	-0.379322	-0.652964	-0.0840895	-0.507407
TCGA.24.1430.01	cluster9	-0.626384	-0.56324	-0.585456	-0.674252	-0.558865	-0.729529	-0.596475	-0.609422	-0.62507	-0.609038	-0.642308	-0.64627	-0.607407	-0.642542	0.133767	-0.00950044	-0.674118	-0.662043	-0.599915
TCGA.24.1544.01	cluster9	-0.679402	-0.561293	-0.65494	-0.694488	-0.664801	-0.66834	-0.554025	-0.721137	-0.543148	-0.566468	-0.590336	-0.591291	-0.693912	-0.658287	-0.705829	-0.393309	-0.715062	-0.570348	-0.622311
TCGA.24.1603.01	cluster9	-0.289857	-0.741316	-0.573282	-0.331769	-0.381307	-0.148246	-0.571584	-0.323628	-0.518252	-0.55325	-0.592429	-0.614062	-0.375209	-0.365458	-0.0734393	-0.692497	-0.533367	-0.301002	-0.45952
TCGA.24.1604.01	cluster9	0.198985	-0.548201	-0.116176	-0.170353	-0.322436	-0.282676	-6.60757e-05	-0.11686	-0.208567	-0.121679	-0.231646	-0.105089	0.0390341	-0.24923	-0.561878	-0.360036	-0.180912	0.244038	-0.152243
TCGA.24.1616.01	cluster9	-0.43778	-0.624324	-0.600596	-0.410045	-0.51889	-0.532619	-0.429496	-0.451952	-0.540857	-0.482586	-0.490153	-0.47068	-0.510757	-0.575498	-0.409485	-0.547944	-0.580475	-0.0649813	-0.493749
TCGA.24.1844.01	cluster9	-0.72431	-0.632292	-0.624669	-0.647762	-0.540695	-0.562454	-0.534117	-0.545584	-0.644091	-0.672841	-0.622958	-0.728326	-0.58213	-0.526559	-0.263264	-0.419842	-0.569774	-0.61596	-0.576383
TCGA.24.1852.01	cluster9	-0.674005	-0.797906	-0.687782	-0.784483	-0.585762	-0.813397	-0.742228	-0.771139	-0.658814	-0.690722	-0.735118	-0.697663	-0.654462	-0.72791	0.362896	-0.655519	-0.673022	-0.827577	-0.657824
TCGA.24.2027.01	cluster9	-0.497538	-0.741136	-0.577213	-0.673877	-0.575592	-0.573876	-0.702918	-0.662063	-0.499288	-0.559099	-0.60352	-0.427249	-0.500279	-0.459822	-0.397603	-0.367308	-0.638793	-0.616317	-0.542382
TCGA.24.2036.01	cluster9	-0.556991	-0.726805	-0.592217	-0.527778	-0.5071	-0.676122	-0.695497	-0.555314	-0.587829	-0.618672	-0.614179	-0.541348	-0.594383	-0.611461	-0.310502	-0.516341	-0.571587	-0.580295	-0.560846
TCGA.25.1315.01	cluster9	-0.690274	-0.773222	-0.691635	-0.683576	-0.625739	-0.72744	-0.713751	-0.659458	-0.652957	-0.671064	-0.694566	-0.678142	-0.641681	-0.607973	-0.681969	-0.392662	-0.646695	-0.511394	-0.645318
TCGA.25.1316.01	cluster9	-0.183164	0.448782	-0.435335	-0.62646	-0.528412	-0.408986	0.307618	-0.567105	0.0503182	0.10065	0.0542471	0.0855941	-0.457094	-0.467821	-0.652057	-0.218015	-0.558023	-0.372198	-0.309688
TCGA.25.1323.01	cluster9	-0.501554	-0.779129	-0.625642	-0.500083	-0.495082	-0.484126	-0.662101	-0.368129	-0.590195	-0.563338	-0.601427	-0.684868	-0.434137	-0.534304	-0.507981	0.235096	-0.503421	-0.351253	-0.520071
TCGA.25.1324.01	cluster9	-0.407637	-0.360618	-0.454698	-0.551327	-0.503004	-0.456349	-0.324649	-0.591185	-0.169766	-0.31692	-0.393388	-0.105337	-0.443092	-0.487494	-0.607976	-0.482308	-0.625218	-0.533454	-0.441759
TCGA.25.1634.01	cluster9	-0.576611	-0.568596	-0.64977	-0.572121	-0.653481	-0.697455	-0.670051	-0.659679	-0.585997	-0.58696	-0.655491	-0.642946	-0.665296	-0.613376	-0.624568	-0.264733	-0.650966	-0.653795	-0.618765
TCGA.25.1871.01	cluster9	-0.585085	-0.433471	-0.653154	-0.669371	-0.630446	-0.602535	-0.523194	-0.549795	-0.531975	-0.539783	-0.620022	-0.512713	-0.622345	-0.577835	-0.33455	-0.45247	-0.56297	-0.636473	-0.577629
TCGA.25.2400.01	cluster9	-0.227544	-0.559482	-0.415728	0.121217	-0.227982	-0.273896	-0.431646	-0.166196	-0.465372	-0.534301	-0.571775	-0.469094	-0.329408	-0.275629	-0.718725	-0.426049	-0.332434	-0.613153	-0.403745
TCGA.29.1691.01	cluster9	-0.3509	-0.367437	-0.29612	-0.302975	-0.0650915	-0.143332	-0.38745	-0.0178831	-0.375457	-0.48466	-0.404187	-0.396019	-0.065912	-0.0217025	-0.160589	-0.497196	-0.250306	-0.576054	-0.293504
TCGA.29.1697.01	cluster9	-0.476416	-0.654147	-0.573798	-0.664351	-0.563731	-0.689324	-0.60718	-0.57418	-0.617721	-0.608271	-0.604906	-0.584558	-0.516169	-0.513536	-0.460412	-0.699776	-0.651702	-0.623036	-0.591932
TCGA.29.1702.01	cluster9	-0.652022	-0.793668	-0.628577	-0.606621	-0.547492	-0.703569	-0.711975	-0.550872	-0.690122	-0.675315	-0.5879	-0.705593	-0.611986	-0.605603	-0.25126	-0.162411	-0.542209	-0.651375	-0.61368
TCGA.29.1762.01	cluster9	-0.494422	-0.778223	-0.345046	-0.122797	-0.340844	-0.64981	-0.685983	-0.108471	-0.608201	-0.600137	-0.577335	-0.660994	-0.379237	-0.280988	0.0157055	-0.183985	-0.145378	-0.578105	-0.46761
TCGA.29.1774.01	cluster9	-0.572407	-0.623816	-0.63168	-0.77436	-0.66932	-0.629579	-0.624568	-0.624069	-0.527732	-0.551646	-0.583465	-0.583448	-0.698748	-0.603251	-0.454968	0.21428	-0.638793	-0.499023	-0.585497
TCGA.29.2414.01	cluster9	-0.637286	-0.907013	-0.571788	-0.53311	-0.512	-0.704633	-0.607336	-0.521192	-0.636366	-0.570449	-0.643227	-0.650932	-0.608431	-0.570566	-0.553936	0.366187	-0.541159	-0.344794	-0.549572
TCGA.30.1714.01	cluster9	-0.243586	-0.540827	-0.571908	-0.482769	-0.488687	-0.492782	-0.401895	-0.416324	-0.483235	-0.531939	-0.431249	-0.453394	-0.568044	-0.536898	-0.522291	-0.268341	-0.38861	-0.581078	-0.482093
TCGA.36.1570.01	cluster9	-0.419978	-0.610175	-0.378118	-0.475242	-0.419472	-0.136535	-0.479277	-0.514906	-0.48813	-0.492592	-0.458088	-0.565633	-0.347028	-0.382629	-0.458856	-0.529425	-0.534731	0.255987	-0.422498
TCGA.36.1571.01	cluster9	-0.609319	-0.627121	-0.585329	-0.750291	-0.631942	-0.680338	-0.689903	-0.67647	-0.608055	-0.644338	-0.610421	-0.716149	-0.526104	-0.604538	-0.507794	-0.466834	-0.669159	-0.232008	-0.598967
TCGA.36.1575.01	cluster9	-0.701532	-0.647333	-0.641244	-0.63272	-0.581666	-0.626838	-0.609486	-0.466916	-0.596906	-0.61562	-0.545598	-0.654705	-0.593402	-0.612428	-0.622354	-0.600617	-0.58199	-0.608822	-0.586743
TCGA.36.2532.01	cluster9	-0.671806	-0.730098	-0.713073	-0.809915	-0.619068	-0.751143	-0.745661	-0.733761	-0.656086	-0.686547	-0.744369	-0.788632	-0.718758	-0.742612	0.181783	-0.661767	-0.698395	-0.742546	-0.663981
TCGA.36.2533.01	cluster9	-0.361469	-0.615922	-0.452174	-0.0518304	-0.244585	-0.442133	-0.54601	-0.292087	-0.562437	-0.569088	-0.607079	-0.622309	-0.414198	-0.216647	-0.647929	-0.600992	-0.366561	-0.608619	-0.440699
TCGA.42.2582.01	cluster9	-0.665651	-0.613154	-0.667028	-0.803928	-0.737891	-0.588438	-0.640315	-0.567439	-0.488463	-0.573162	-0.571471	-0.520316	-0.677978	-0.724607	0.0474342	0.270717	-0.655459	-0.66862	-0.615631
TCGA.57.1582.01	cluster9	-0.584463	-0.328755	-0.339049	-0.280596	-0.147192	0.0217132	-0.521305	-0.356069	-0.394038	-0.517568	-0.421056	-0.419902	-0.200191	-0.173218	-0.40338	0.241926	-0.449317	-0.148729	-0.381422
TCGA.57.1586.01	cluster9	-0.111842	-0.463495	-0.331277	-0.369826	-0.310314	-0.198431	-0.386927	-0.491418	-0.303672	-0.386707	-0.26627	-0.41904	-0.265349	-0.28581	-0.765133	-0.627212	-0.334401	-0.218706	-0.319957
TCGA.61.1730.01	cluster9	-0.445594	-0.705354	-0.361562	-0.275451	-0.0978814	-0.555749	-0.639244	0.0349217	-0.507915	-0.510612	-0.582468	-0.45457	-0.387024	-0.189703	-0.460173	-0.123471	-0.0881439	-0.149376	-0.402447
TCGA.61.1900.01	cluster9	-0.559081	-0.775719	-0.672411	-0.612424	-0.69832	-0.746272	-0.747118	-0.619066	-0.629622	-0.694166	-0.717879	-0.697862	-0.661317	-0.696835	-0.0556442	-0.460789	-0.619619	-0.525442	-0.635435
TCGA.61.1910.01	cluster9	-0.329761	-0.546129	-0.238731	-0.424259	-0.345188	-0.0202191	-0.528306	-0.357414	-0.47848	-0.531298	-0.499019	-0.499867	-0.26197	-0.353095	0.137623	-0.437861	-0.289189	-0.348516	-0.37661
TCGA.61.2088.01	cluster9	-0.37312	-0.832641	-0.47853	-0.397046	-0.322598	-0.608576	-0.662882	-0.455804	-0.52392	-0.550865	-0.582217	-0.601209	-0.455347	-0.47564	-0.458005	-0.595821	-0.270426	-0.414478	-0.440216
TCGA.61.2092.01	cluster9	-0.214301	-0.517177	-0.504755	-0.626184	-0.559607	-0.773494	-0.603184	-0.560716	-0.340707	-0.527896	-0.472937	-0.403019	-0.569222	-0.60271	-0.527545	-0.438757	-0.586689	-0.397213	-0.49602
TCGA.61.2096.01	cluster9	-0.418457	-0.568556	-0.380794	-0.478403	-0.424534	-0.314852	-0.505049	-0.463535	-0.438629	-0.523904	-0.469927	-0.533367	-0.456146	-0.471578	-0.331601	-0.675509	-0.435919	-0.00714761	-0.434219
TCGA.61.2613.01	cluster9	-0.619435	-0.85477	-0.626935	-0.500022	-0.510996	-0.59089	-0.634119	-0.476281	-0.632305	-0.599058	-0.620168	-0.615297	-0.574149	-0.571026	-0.482644	0.335267	-0.577417	-0.320582	-0.561125

## Sheet: STable1c
Supplementary Table 1C. GSVA scores and cluster annotation for PD1/Angiogenesis clusters.
SampleID	Cluster	LU_TUMANGIO_UP	REACTOME_PD1
TCGA.30.1857.01	cluster1	0.485159	0.543074
TCGA.10.0930.01	cluster1	0.469566	0.557763
TCGA.30.1867.01	cluster1	0.438937	0.550475
TCGA.09.1668.01	cluster1	0.499503	0.50548
TCGA.09.1667.01	cluster1	0.472451	0.499554
TCGA.23.2078.01	cluster1	0.510557	0.626419
TCGA.25.2401.01	cluster1	0.493192	0.589602
TCGA.24.1564.01	cluster1	0.417181	0.644618
TCGA.13.1411.01	cluster1	0.373846	0.577937
TCGA.25.1626.01	cluster1	0.393938	0.550626
TCGA.36.2529.01	cluster1	0.340162	0.574838
TCGA.31.1951.01	cluster1	0.355548	0.544793
TCGA.13.2061.01	cluster1	0.307334	0.634555
TCGA.13.1499.01	cluster1	0.484547	0.786897
TCGA.31.1956.01	cluster1	0.440209	0.809084
TCGA.31.1953.01	cluster1	0.372623	0.856585
TCGA.13.0768.01	cluster1	0.613304	0.742773
TCGA.25.1623.01	cluster1	0.578226	0.682113
TCGA.24.2035.01	cluster1	0.237424	0.60364
TCGA.20.0987.01	cluster1	0.233173	0.600422
TCGA.61.1722.01	cluster1	0.220154	0.601467
TCGA.24.2281.01	cluster1	0.245843	0.656413
TCGA.61.1740.01	cluster1	0.248437	0.627017
TCGA.13.0886.01	cluster1	0.192088	0.647196
TCGA.36.2544.01	cluster1	0.162628	0.647349
TCGA.24.1847.01	cluster1	0.326356	0.764727
TCGA.61.2002.01	cluster1	0.259873	0.775389
TCGA.20.0991.01	cluster1	0.241379	0.699916
TCGA.24.1849.01	cluster1	0.206477	0.724191
TCGA.13.2065.01	cluster1	0.208627	0.454675
TCGA.31.1944.01	cluster1	0.195497	0.46517
TCGA.13.0916.01	cluster1	0.226528	0.444955
TCGA.24.2288.01	cluster1	0.213808	0.510199
TCGA.29.1768.01	cluster1	0.165813	0.486814
TCGA.59.2354.01	cluster1	0.173777	0.543121
TCGA.23.1117.01	cluster1	0.133671	0.556433
TCGA.61.1919.01	cluster1	0.380066	0.367099
TCGA.25.2042.01	cluster1	0.382248	0.351418
TCGA.24.1417.01	cluster1	0.390513	0.327494
TCGA.61.1903.01	cluster1	0.352269	0.340314
TCGA.30.1718.01	cluster1	0.341615	0.347117
TCGA.25.1630.01	cluster1	0.371198	0.280641
TCGA.61.2003.01	cluster1	0.348175	0.301786
TCGA.13.0911.01	cluster1	0.440829	0.369719
TCGA.23.2641.01	cluster1	0.422262	0.374385
TCGA.23.2649.01	cluster1	0.442776	0.339483
TCGA.61.2095.01	cluster1	0.421555	0.322652
TCGA.29.1764.01	cluster1	0.276596	0.374866
TCGA.13.0908.01	cluster1	0.28642	0.345407
TCGA.13.0761.01	cluster1	0.275945	0.309731
TCGA.09.2053.01	cluster1	0.306989	0.457229
TCGA.29.1704.01	cluster1	0.301808	0.45411
TCGA.61.1913.01	cluster1	0.303977	0.467616
TCGA.20.1682.01	cluster1	0.294865	0.410424
TCGA.04.1365.01	cluster1	0.282989	0.401855
TCGA.24.1427.01	cluster1	0.309713	0.404295
TCGA.24.2293.01	cluster1	0.406348	0.479934
TCGA.61.2012.01	cluster1	0.375612	0.477826
TCGA.04.1338.01	cluster1	0.425329	0.448866
TCGA.13.0894.01	cluster1	0.388971	0.415981
TCGA.23.1116.01	cluster1	0.506632	0.253173
TCGA.29.1695.01	cluster1	0.487358	0.261306
TCGA.25.1628.01	cluster1	0.605038	0.435629
TCGA.61.2113.01	cluster1	0.612237	0.352704
TCGA.36.1576.01	cluster1	0.694299	0.535478
TCGA.13.0807.01	cluster2	0.157049	-0.0191172
TCGA.24.1418.01	cluster2	0.127404	-0.0142159
TCGA.13.0762.01	cluster2	0.151651	0.0309404
TCGA.13.0714.01	cluster2	0.109505	0.0428995
TCGA.13.0726.01	cluster2	0.0821083	0.036486
TCGA.29.2425.01	cluster2	0.05106	0.0133898
TCGA.24.2019.01	cluster2	0.146492	-0.0866855
TCGA.13.0901.01	cluster2	0.149037	-0.0949898
TCGA.36.2540.01	cluster2	0.13076	-0.0907413
TCGA.24.0970.01	cluster2	0.143751	-0.0623548
TCGA.13.1510.01	cluster2	0.175533	-0.102511
TCGA.13.0804.01	cluster2	0.0825183	-0.0427194
TCGA.04.1351.01	cluster2	0.0708915	-0.0616946
TCGA.23.1031.01	cluster2	0.0463711	-0.0746954
TCGA.61.1914.01	cluster2	0.0292529	-0.0684124
TCGA.09.1662.01	cluster2	0.109327	-0.118185
TCGA.24.1563.01	cluster2	0.102586	-0.129108
TCGA.23.1120.01	cluster2	0.076598	-0.0928487
TCGA.13.0797.01	cluster2	0.057956	-0.117135
TCGA.13.0903.01	cluster2	0.174817	-0.162324
TCGA.13.1497.01	cluster2	0.137073	-0.160948
TCGA.30.1892.01	cluster2	0.150659	-0.166369
TCGA.13.0758.01	cluster2	0.147532	-0.175358
TCGA.13.0906.01	cluster2	0.162742	-0.229341
TCGA.24.1567.01	cluster2	0.134698	-0.20801
TCGA.61.1916.02	cluster2	0.108166	-0.257971
TCGA.59.2348.01	cluster2	0.0854363	-0.273187
TCGA.23.1027.01	cluster2	0.103497	-0.198748
TCGA.24.1424.01	cluster2	0.0811566	-0.201276
TCGA.30.1859.01	cluster2	0.0777349	-0.144511
TCGA.24.0982.01	cluster2	0.0609032	-0.159369
TCGA.13.1410.01	cluster2	0.0641169	-0.175655
TCGA.13.0727.01	cluster2	0.0401678	-0.230469
TCGA.25.2393.01	cluster2	-0.00373238	-0.186909
TCGA.25.1314.01	cluster2	0.0362593	-0.16529
TCGA.13.0905.01	cluster2	0.0452016	-0.189868
TCGA.13.0920.01	cluster2	-0.0619684	0.0338864
TCGA.24.1466.01	cluster2	-0.0259758	-0.0011824
TCGA.09.1665.01	cluster2	-0.0205888	-0.0253491
TCGA.23.1030.01	cluster2	-0.00962501	-0.0479469
TCGA.25.1877.01	cluster2	-0.0455471	-0.0552723
TCGA.13.0725.01	cluster2	-0.0238415	-0.0536502
TCGA.25.1635.01	cluster2	-0.0317862	-0.0545911
TCGA.24.1920.01	cluster2	-0.00627056	-0.10182
TCGA.04.1646.01	cluster2	-0.0643559	-0.15602
TCGA.61.1728.01	cluster2	-0.0709965	-0.108017
TCGA.29.1777.01	cluster2	-0.0485615	-0.127749
TCGA.24.1436.01	cluster2	-0.0600299	-0.122231
TCGA.23.2072.01	cluster2	-0.135877	-0.0413471
TCGA.61.1736.01	cluster2	-0.0956493	-0.0831948
TCGA.30.1862.01	cluster2	-0.12291	-0.128018
TCGA.25.1316.01	cluster2	-0.128381	-0.135892
TCGA.13.1495.01	cluster2	-0.138174	-0.0862404
TCGA.24.1928.01	cluster2	-0.15261	-0.1049
TCGA.57.1586.01	cluster2	-0.138507	-0.113753
TCGA.13.0800.01	cluster2	-0.137223	-0.119662
TCGA.29.1699.01	cluster3	-0.401351	0.312185
TCGA.59.2372.01	cluster3	-0.378222	0.272781
TCGA.24.1565.01	cluster3	-0.512469	0.236326
TCGA.24.1464.01	cluster3	-0.433253	0.186593
TCGA.29.2436.01	cluster3	-0.430253	0.2708
TCGA.13.0904.01	cluster3	-0.463023	0.25157
TCGA.04.1361.01	cluster3	-0.24888	0.214582
TCGA.30.1880.01	cluster3	-0.304536	0.267901
TCGA.29.1776.01	cluster3	-0.228766	0.132859
TCGA.04.1638.01	cluster3	-0.252266	0.155336
TCGA.29.1761.01	cluster3	-0.256225	0.133603
TCGA.13.0921.01	cluster3	-0.271716	0.139777
TCGA.13.0923.01	cluster3	-0.358485	0.134034
TCGA.61.1906.01	cluster3	-0.341923	0.101024
TCGA.09.2051.01	cluster3	-0.372095	0.0986491
TCGA.24.2038.01	cluster3	-0.393128	0.0442319
TCGA.09.1672.01	cluster3	-0.418436	0.0790581
TCGA.10.0936.01	cluster3	-0.457775	0.0827793
TCGA.24.2023.01	cluster3	-0.19373	0.0873504
TCGA.25.1324.01	cluster3	-0.164134	0.0895199
TCGA.04.1367.01	cluster3	-0.141445	0.101116
TCGA.31.1950.01	cluster3	-0.136179	0.0810791
TCGA.61.2111.01	cluster3	-0.145355	0.0760472
TCGA.13.0755.01	cluster3	-0.154524	0.0477081
TCGA.29.1691.01	cluster3	-0.150198	0.0242536
TCGA.23.1022.01	cluster3	-0.164437	0.0326021
TCGA.04.1350.01	cluster3	-0.233242	-0.0679395
TCGA.42.2588.01	cluster3	-0.193371	-0.0105552
TCGA.04.1371.01	cluster3	-0.196279	-0.0302725
TCGA.04.1536.01	cluster3	-0.328892	-0.00334525
TCGA.29.1775.01	cluster3	-0.268958	-0.0157032
TCGA.61.2017.01	cluster3	-0.277715	-0.0196144
TCGA.24.1614.01	cluster3	-0.252786	0.0814016
TCGA.61.1725.01	cluster3	-0.265081	0.0643285
TCGA.09.2056.01	cluster3	-0.339237	0.0570725
TCGA.59.2355.01	cluster3	-0.288202	0.0382958
TCGA.61.2110.01	cluster3	-0.302905	0.0441323
TCGA.04.1649.01	cluster3	-0.311685	0.0431542
TCGA.24.0966.01	cluster3	-0.578854	-0.185049
TCGA.42.2589.01	cluster3	-0.521612	-0.0416478
TCGA.20.0996.01	cluster3	-0.567904	-0.0641255
TCGA.61.2092.01	cluster3	-0.484164	-0.0813392
TCGA.61.2018.01	cluster3	-0.473987	-0.0258684
TCGA.29.1771.01	cluster3	-0.43359	-0.0227727
TCGA.23.1021.01	cluster3	-0.452385	-0.0081886
TCGA.13.0724.01	cluster3	-0.342285	-0.102455
TCGA.23.2077.01	cluster3	-0.363538	-0.0892292
TCGA.25.1870.01	cluster3	-0.400305	-0.16652
TCGA.25.1325.01	cluster3	-0.356443	-0.175689
TCGA.24.1845.01	cluster3	-0.377091	-0.208808
TCGA.29.2431.01	cluster3	-0.308425	-0.129134
TCGA.61.1918.01	cluster3	-0.316164	-0.150267
TCGA.10.0927.01	cluster3	-0.306745	-0.168185
TCGA.24.1560.01	cluster3	-0.234863	-0.110111
TCGA.25.1871.01	cluster3	-0.224594	-0.126455
TCGA.25.1326.01	cluster3	-0.262184	-0.119496
TCGA.23.2084.01	cluster3	-0.270401	-0.127817
TCGA.04.1364.01	cluster4	-0.274151	-0.784363
TCGA.24.0979.01	cluster4	0.145568	-0.761733
TCGA.61.2611.02	cluster4	0.109843	-0.811858
TCGA.36.2532.01	cluster4	0.0058288	-0.750066
TCGA.24.1423.01	cluster4	0.1073	-0.662846
TCGA.09.1674.01	cluster4	0.100061	-0.690631
TCGA.61.2612.01	cluster4	0.0477735	-0.670382
TCGA.04.1341.01	cluster4	0.0838933	-0.642639
TCGA.13.1511.01	cluster4	0.0733535	-0.657655
TCGA.29.1694.01	cluster4	0.125706	-0.448114
TCGA.20.1683.01	cluster4	0.0854905	-0.44291
TCGA.04.1335.01	cluster4	0.125168	-0.519397
TCGA.09.0369.01	cluster4	0.116222	-0.549148
TCGA.09.2050.01	cluster4	0.0960242	-0.490265
TCGA.23.1118.01	cluster4	0.0880183	-0.511906
TCGA.25.1320.01	cluster4	0.077375	-0.531611
TCGA.04.1517.01	cluster4	0.174331	-0.603901
TCGA.25.1632.01	cluster4	-0.000356789	-0.582756
TCGA.24.1544.01	cluster4	0.0231986	-0.610683
TCGA.24.1852.01	cluster4	0.100006	-0.619992
TCGA.24.2297.01	cluster4	0.0985609	-0.579514
TCGA.23.1809.01	cluster4	0.0647361	-0.586488
TCGA.29.1702.01	cluster4	-0.162909	-0.645216
TCGA.24.1603.01	cluster4	-0.125796	-0.596171
TCGA.23.1111.01	cluster4	-0.144338	-0.604518
TCGA.36.2534.01	cluster4	-0.064856	-0.708788
TCGA.29.1762.01	cluster4	-0.118351	-0.693104
TCGA.57.1992.01	cluster4	-0.0444778	-0.645118
TCGA.24.1616.01	cluster4	-0.0397476	-0.662735
TCGA.24.1844.01	cluster4	-0.081342	-0.643903
TCGA.24.1469.01	cluster4	-0.0741331	-0.610663
TCGA.24.1557.01	cluster4	-0.0665098	-0.621011
TCGA.13.1477.01	cluster4	-0.0152148	-0.497754
TCGA.61.1899.01	cluster4	-0.0171716	-0.527272
TCGA.23.2643.01	cluster4	0.0539128	-0.527641
TCGA.61.2102.01	cluster4	0.0339556	-0.51545
TCGA.24.2295.01	cluster4	0.016397	-0.531989
TCGA.04.1342.01	cluster4	0.013608	-0.539677
TCGA.61.1730.01	cluster4	-0.06538	-0.464584
TCGA.36.2548.01	cluster4	-0.0769892	-0.482583
TCGA.13.0802.01	cluster4	-0.0709979	-0.500378
TCGA.24.1419.01	cluster4	-0.034218	-0.451389
TCGA.23.1113.01	cluster4	-0.0371278	-0.462178
TCGA.13.0720.01	cluster4	-0.0282355	-0.470734
TCGA.04.1331.01	cluster4	-0.0299755	-0.472881
TCGA.25.1323.01	cluster4	-0.0767473	-0.562369
TCGA.29.2414.01	cluster4	-0.0875312	-0.594357
TCGA.09.0364.01	cluster4	-0.0956461	-0.595935
TCGA.24.1430.01	cluster4	-0.077667	-0.524302
TCGA.13.1506.01	cluster4	-0.0949726	-0.510035
TCGA.24.1474.01	cluster4	-0.0463724	-0.531642
TCGA.24.2036.01	cluster4	-0.0547487	-0.538387
TCGA.09.1664.01	cluster4	-0.0583554	-0.543967
TCGA.61.2088.01	cluster4	-0.141407	-0.531619
TCGA.61.1916.01	cluster4	-0.129563	-0.556693
TCGA.13.1409.01	cluster4	-0.156662	-0.552974
TCGA.61.2613.01	cluster4	-0.178626	-0.55224
TCGA.24.1558.01	cluster4	-0.117037	-0.488607
TCGA.25.2400.01	cluster4	-0.136526	-0.504638
TCGA.57.1584.01	cluster4	-0.164413	-0.48918
TCGA.24.1548.01	cluster4	-0.18173	-0.51371
TCGA.24.1416.01	cluster4	-0.178399	-0.518806
TCGA.36.2530.01	cluster5	0.495981	-0.326214
TCGA.13.0900.01	cluster5	0.471356	-0.317757
TCGA.61.2097.01	cluster5	0.439197	-0.287143
TCGA.13.2071.01	cluster5	0.451139	-0.353756
TCGA.24.1550.01	cluster5	0.423526	-0.357388
TCGA.42.2591.01	cluster5	0.541839	-0.257403
TCGA.24.2262.01	cluster5	0.559976	-0.367902
TCGA.25.1317.01	cluster5	0.540879	-0.446489
TCGA.23.2647.01	cluster5	0.520127	-0.551929
TCGA.23.1122.01	cluster5	0.446649	-0.560576
TCGA.59.2363.01	cluster5	0.455754	-0.571153
TCGA.24.2254.01	cluster5	0.373182	-0.418031
TCGA.61.1743.01	cluster5	0.368319	-0.456539
TCGA.13.0730.01	cluster5	0.444768	-0.478341
TCGA.13.1501.01	cluster5	0.398433	-0.493663
TCGA.61.2101.01	cluster5	0.37278	-0.493532
TCGA.13.1483.01	cluster5	0.382057	-0.507476
TCGA.13.1408.01	cluster5	0.377663	-0.249533
TCGA.09.1659.01	cluster5	0.244041	-0.234365
TCGA.30.1891.01	cluster5	0.310662	-0.294215
TCGA.10.0928.01	cluster5	0.30727	-0.311437
TCGA.24.1546.01	cluster5	0.344698	-0.375924
TCGA.61.1998.01	cluster5	0.291788	-0.38461
TCGA.09.1661.01	cluster5	0.2254	-0.299511
TCGA.13.0891.01	cluster5	0.16838	-0.314095
TCGA.29.2434.01	cluster5	0.161484	-0.312006
TCGA.29.1763.01	cluster5	0.248048	-0.354153
TCGA.30.1861.01	cluster5	0.238138	-0.373361
TCGA.23.1109.01	cluster5	0.175142	-0.375151
TCGA.24.2020.01	cluster5	0.175675	-0.396732
TCGA.42.2587.01	cluster5	0.217547	-0.524601
TCGA.04.1651.01	cluster5	0.300913	-0.457147
TCGA.23.1121.01	cluster5	0.291101	-0.48542
TCGA.36.2537.01	cluster5	0.28193	-0.498237
TCGA.25.2404.01	cluster5	0.209986	-0.422409
TCGA.25.1627.01	cluster5	0.202373	-0.417831
TCGA.13.0717.01	cluster5	0.179892	-0.460504
TCGA.13.1482.01	cluster5	0.1604	-0.446649
TCGA.61.2098.01	cluster5	0.331282	-0.736458
TCGA.25.1631.01	cluster5	0.277684	-0.710248
TCGA.23.1114.01	cluster5	0.29138	-0.740904
TCGA.04.1332.01	cluster5	0.35546	-0.612571
TCGA.29.1770.01	cluster5	0.400692	-0.577041
TCGA.13.1485.01	cluster5	0.382461	-0.600385
TCGA.13.1487.01	cluster5	0.255557	-0.581506
TCGA.25.1322.01	cluster5	0.258154	-0.646935
TCGA.36.2542.01	cluster6	0.0983562	-0.370872
TCGA.04.1648.01	cluster6	0.0564235	-0.353316
TCGA.13.1509.01	cluster6	0.0770496	-0.314094
TCGA.09.2054.01	cluster6	0.040123	-0.2933
TCGA.13.0757.01	cluster6	0.0481535	-0.308966
TCGA.25.1329.01	cluster6	0.0159221	-0.382526
TCGA.61.1900.01	cluster6	0.00437829	-0.413014
TCGA.25.2397.01	cluster6	0.0205336	-0.405729
TCGA.23.1029.01	cluster6	0.0145524	-0.409083
TCGA.30.1714.01	cluster6	-0.182487	-0.293547
TCGA.13.0794.01	cluster6	-0.263277	-0.320845
TCGA.36.2543.01	cluster6	-0.214412	-0.311715
TCGA.09.0367.01	cluster6	-0.236781	-0.300825
TCGA.13.1407.01	cluster6	-0.183004	-0.166205
TCGA.13.1819.01	cluster6	-0.209094	-0.16444
TCGA.24.1604.01	cluster6	-0.234745	-0.171709
TCGA.20.1686.01	cluster6	-0.247302	-0.17166
TCGA.09.0365.01	cluster6	-0.240051	-0.232586
TCGA.10.0931.01	cluster6	-0.194677	-0.234325
TCGA.25.1625.01	cluster6	-0.204142	-0.217913
TCGA.61.1721.01	cluster6	-0.221953	-0.217193
TCGA.23.2081.01	cluster6	-0.0994188	-0.286729
TCGA.42.2582.01	cluster6	-0.111283	-0.287693
TCGA.61.1741.01	cluster6	-0.112554	-0.232463
TCGA.04.1525.01	cluster6	-0.121749	-0.232634
TCGA.09.2049.01	cluster6	-0.149494	-0.227772
TCGA.13.0765.01	cluster6	-0.137403	-0.242301
TCGA.13.1489.01	cluster6	0.0212473	-0.261117
TCGA.29.1703.01	cluster6	0.00338287	-0.249933
TCGA.13.1403.01	cluster6	-0.0422993	-0.283417
TCGA.13.0766.01	cluster6	-0.0645604	-0.289873
TCGA.25.1318.01	cluster6	-0.0169729	-0.287186
TCGA.59.2350.01	cluster6	-0.0104386	-0.302019
TCGA.57.1582.01	cluster6	-0.0249149	-0.309335
TCGA.61.1910.01	cluster6	-0.0244648	-0.317181
TCGA.24.2024.01	cluster6	-0.0177834	-0.330524
TCGA.04.1362.01	cluster6	-0.0228516	-0.339461
TCGA.29.1697.01	cluster6	-0.0539805	-0.407738
TCGA.25.1634.01	cluster6	-0.0695392	-0.377327
TCGA.29.1693.01	cluster6	-0.0757567	-0.378779
TCGA.25.1315.01	cluster6	-0.0892397	-0.439729
TCGA.24.1105.01	cluster6	-0.112823	-0.438697
TCGA.24.2033.01	cluster6	-0.127243	-0.423429
TCGA.29.2429.01	cluster6	-0.131125	-0.428344
TCGA.36.2533.01	cluster6	-0.176671	-0.440366
TCGA.24.1467.01	cluster6	-0.191432	-0.434493
TCGA.23.1110.01	cluster6	-0.216568	-0.379335
TCGA.13.0751.01	cluster6	-0.22055	-0.381325
TCGA.13.0887.01	cluster6	-0.211063	-0.395774
TCGA.09.1673.01	cluster6	-0.200266	-0.406807
TCGA.13.1491.01	cluster6	-0.131169	-0.373238
TCGA.24.1103.01	cluster6	-0.0997726	-0.378075
TCGA.04.1542.01	cluster6	-0.105725	-0.387493
TCGA.23.1107.01	cluster6	-0.110974	-0.396599
TCGA.57.1583.01	cluster6	-0.115111	-0.34004
TCGA.10.0938.01	cluster6	-0.126019	-0.334064
TCGA.36.1571.01	cluster6	-0.155732	-0.334787
TCGA.24.2027.01	cluster6	-0.137671	-0.342136
TCGA.61.1724.01	cluster6	-0.14146	-0.350805
TCGA.31.1946.01	cluster7	0.308186	0.132667
TCGA.04.1360.01	cluster7	0.298886	0.133092
TCGA.31.1959.01	cluster7	0.334951	0.13142
TCGA.13.2066.01	cluster7	0.321976	0.0903736
TCGA.36.1568.01	cluster7	0.259703	0.153037
TCGA.61.2000.01	cluster7	0.24901	0.14636
TCGA.24.2289.01	cluster7	0.258809	0.175731
TCGA.04.1530.01	cluster7	0.375351	0.202486
TCGA.04.1356.01	cluster7	0.396002	0.150145
TCGA.36.1574.01	cluster7	0.290481	0.0135428
TCGA.36.2545.01	cluster7	0.272659	0.0160961
TCGA.30.1855.01	cluster7	0.297737	0.0384683
TCGA.13.1488.01	cluster7	0.333691	0.0427012
TCGA.13.0919.01	cluster7	0.368727	-0.0106138
TCGA.23.1023.01	cluster7	0.327989	-0.0508549
TCGA.09.1666.01	cluster7	0.184165	0.101147
TCGA.24.2030.01	cluster7	0.18752	0.0758782
TCGA.09.1669.01	cluster7	0.22162	0.114948
TCGA.61.2614.01	cluster7	0.175537	0.042551
TCGA.10.0933.01	cluster7	0.245854	0.00188211
TCGA.24.0975.01	cluster7	0.228956	0.00416717
TCGA.29.1705.01	cluster7	0.261741	0.0742179
TCGA.24.1850.01	cluster7	0.469953	-0.151501
TCGA.24.2280.01	cluster7	0.433699	-0.144531
TCGA.36.1577.01	cluster7	0.41822	-0.183479
TCGA.24.1463.01	cluster7	0.481025	-0.195323
TCGA.24.2298.01	cluster7	0.459143	-0.223557
TCGA.25.2408.01	cluster7	0.39069	-0.12126
TCGA.13.2059.01	cluster7	0.406381	-0.141872
TCGA.25.2398.01	cluster7	0.522266	-0.207176
TCGA.36.2538.01	cluster7	0.502861	-0.204134
TCGA.24.1425.01	cluster7	0.545628	-0.183107
TCGA.13.1512.01	cluster7	0.524255	-0.132555
TCGA.29.1698.01	cluster7	0.494639	-0.108455
TCGA.24.2290.01	cluster7	0.473179	-0.0593917
TCGA.61.1737.01	cluster7	0.466778	-0.0852567
TCGA.57.1585.01	cluster7	0.447259	-0.0194639
TCGA.13.1481.01	cluster7	0.593118	0.0199822
TCGA.13.1494.01	cluster7	0.484398	0.0460345
TCGA.24.1435.01	cluster7	0.504808	0.00756117
TCGA.13.0890.01	cluster7	0.419173	0.0746512
TCGA.24.1434.01	cluster7	0.266239	-0.068532
TCGA.04.1337.01	cluster7	0.228614	-0.101555
TCGA.13.0888.01	cluster7	0.339237	-0.152981
TCGA.13.1492.01	cluster7	0.292899	-0.190791
TCGA.13.1498.01	cluster8	0.107393	0.283614
TCGA.13.0793.01	cluster8	0.10068	0.282383
TCGA.29.1692.01	cluster8	0.0815865	0.2744
TCGA.04.1652.01	cluster8	0.143623	0.304606
TCGA.24.1562.01	cluster8	0.15693	0.286154
TCGA.25.1633.01	cluster8	0.228001	0.227193
TCGA.23.1026.01	cluster8	0.23811	0.207586
TCGA.13.1505.01	cluster8	0.17045	0.1923
TCGA.13.0805.01	cluster8	0.197744	0.162261
TCGA.61.2104.01	cluster8	0.0945685	0.233376
TCGA.13.1404.01	cluster8	0.075884	0.227279
TCGA.10.0926.01	cluster8	0.100536	0.205858
TCGA.24.1556.01	cluster8	0.0819631	0.202612
TCGA.24.1551.01	cluster8	-0.00302422	0.171997
TCGA.13.0897.01	cluster8	0.000703139	0.165518
TCGA.25.2391.01	cluster8	-0.00376036	0.19764
TCGA.59.2352.01	cluster8	0.0480195	0.193771
TCGA.61.2109.01	cluster8	0.0722466	0.141606
TCGA.29.1688.01	cluster8	0.0538732	0.156252
TCGA.61.2009.01	cluster8	0.0772988	0.0976562
TCGA.13.1504.01	cluster8	0.0499989	0.112119
TCGA.24.1846.01	cluster8	0.127711	0.104796
TCGA.24.2260.01	cluster8	0.11184	0.0918702
TCGA.13.0899.01	cluster8	0.124961	0.136221
TCGA.61.1895.01	cluster8	0.0255449	0.432862
TCGA.13.0912.01	cluster8	0.0386142	0.409108
TCGA.24.1422.01	cluster8	0.00583146	0.389163
TCGA.23.1028.01	cluster8	-0.026138	0.390997
TCGA.24.0980.01	cluster8	0.100128	0.458229
TCGA.36.1580.01	cluster8	0.123944	0.430069
TCGA.13.0883.01	cluster8	0.0875785	0.364135
TCGA.61.2610.02	cluster8	0.0203094	0.312937
TCGA.29.1778.01	cluster8	0.015769	0.317146
TCGA.13.0791.01	cluster8	0.0244072	0.322755
TCGA.04.1654.01	cluster8	0.0402729	0.342503
TCGA.29.1766.01	cluster8	0.0194347	0.348453
TCGA.23.1124.01	cluster8	-0.00775039	0.342261
TCGA.61.1734.01	cluster8	0.0453693	0.269372
TCGA.04.1353.01	cluster8	0.0304218	0.27982
TCGA.25.2399.01	cluster8	-0.0803213	0.34707
TCGA.36.2549.01	cluster8	-0.0800807	0.321007
TCGA.13.0792.01	cluster8	-0.0567399	0.374162
TCGA.04.1369.01	cluster8	-0.137386	0.38066
TCGA.13.0801.01	cluster8	-0.161332	0.337709
TCGA.29.1769.01	cluster8	-0.0809638	0.284948
TCGA.13.1507.01	cluster8	-0.0610266	0.260245
TCGA.10.0935.01	cluster8	-0.133384	0.205001
TCGA.24.1428.01	cluster8	-0.129343	0.192352
TCGA.24.1924.01	cluster8	-0.117839	0.226941
TCGA.13.0910.01	cluster8	-0.0731439	0.206381
TCGA.25.2409.01	cluster8	-0.192807	0.265501
TCGA.20.1687.01	cluster8	-0.197857	0.269628
TCGA.23.1119.01	cluster8	-0.193151	0.254424
TCGA.25.2392.01	cluster8	-0.202753	0.237975
TCGA.13.0803.01	cluster8	-0.189948	0.195008
TCGA.09.2043.01	cluster8	-0.0420625	0.159153
TCGA.13.1500.01	cluster8	-0.0464764	0.135339
TCGA.61.2016.01	cluster8	-0.0416753	0.104563
TCGA.29.1707.01	cluster8	-0.123952	0.149481
TCGA.20.1685.01	cluster8	-0.138737	0.13062
TCGA.24.1549.01	cluster8	-0.108047	0.112113
TCGA.13.1405.01	cluster8	-0.0975087	0.0744629
TCGA.24.1923.01	cluster9	-0.327209	-0.242543
TCGA.24.1431.01	cluster9	-0.331815	-0.280247
TCGA.09.1675.01	cluster9	-0.415803	-0.228632
TCGA.09.2045.01	cluster9	-0.397001	-0.255739
TCGA.09.2055.01	cluster9	-0.533453	-0.236275
TCGA.04.1347.01	cluster9	-0.39249	-0.345891
TCGA.57.1993.01	cluster9	-0.418379	-0.340245
TCGA.24.1555.01	cluster9	-0.41485	-0.352113
TCGA.20.0990.01	cluster9	-0.454597	-0.378824
TCGA.10.0925.01	cluster9	-0.458168	-0.31972
TCGA.25.1321.01	cluster9	-0.479479	-0.342383
TCGA.25.1312.01	cluster9	-0.417118	-0.460718
TCGA.25.1319.01	cluster9	-0.490286	-0.507242
TCGA.24.1471.01	cluster9	-0.578411	-0.570696
TCGA.13.0913.01	cluster9	-0.512378	-0.647178
TCGA.23.1032.01	cluster9	-0.465856	-0.627291
TCGA.61.1901.01	cluster9	-0.441101	-0.591747
TCGA.24.1552.01	cluster9	-0.432673	-0.602236
TCGA.29.1696.01	cluster9	-0.438992	-0.603896
TCGA.10.0934.01	cluster9	-0.322664	-0.357482
TCGA.25.1328.01	cluster9	-0.330031	-0.368642
TCGA.61.2096.01	cluster9	-0.354276	-0.359863
TCGA.24.1413.01	cluster9	-0.349725	-0.380531
TCGA.36.1575.01	cluster9	-0.343584	-0.443393
TCGA.09.2048.01	cluster9	-0.365468	-0.426116
TCGA.09.1670.01	cluster9	-0.295399	-0.437904
TCGA.04.1655.01	cluster9	-0.314504	-0.405956
TCGA.24.1426.01	cluster9	-0.331279	-0.403926
TCGA.36.2551.01	cluster9	-0.272827	-0.500629
TCGA.25.1313.01	cluster9	-0.237818	-0.459244
TCGA.61.2008.01	cluster9	-0.202624	-0.495032
TCGA.04.1519.01	cluster9	-0.244565	-0.56145
TCGA.36.1570.01	cluster9	-0.231214	-0.575097
TCGA.04.1514.01	cluster9	-0.228219	-0.59322
TCGA.20.1684.01	cluster9	-0.23768	-0.588638
TCGA.61.1738.01	cluster9	-0.350781	-0.665741
TCGA.61.1733.01	cluster9	-0.37195	-0.520561
TCGA.13.0799.01	cluster9	-0.387534	-0.517311
TCGA.30.1853.01	cluster9	-0.339535	-0.527077
TCGA.29.1774.01	cluster9	-0.338306	-0.546036
TCGA.23.1024.01	cluster9	-0.373868	-0.558198
TCGA.04.1644.01	cluster9	-0.344506	-0.570298
TCGA.04.1516.01	cluster9	-0.357631	-0.576843
TCGA.30.1856.01	cluster10	-0.0581672	0.636585
TCGA.23.2645.01	cluster10	-0.0621262	0.63255
TCGA.24.0968.01	cluster10	-0.0732632	0.622194
TCGA.24.1930.01	cluster10	-0.0735256	0.621969
TCGA.04.1348.01	cluster10	-0.119324	0.635029
TCGA.24.2267.01	cluster10	-0.126477	0.696056
TCGA.24.1842.01	cluster10	-0.135739	0.690473
TCGA.13.0885.01	cluster10	-0.108246	0.705593
TCGA.29.1710.01	cluster10	-0.164036	0.689001
TCGA.29.1711.01	cluster10	-0.0287886	0.578722
TCGA.36.1581.01	cluster10	-0.0483078	0.54423
TCGA.36.1569.01	cluster10	-0.0748441	0.587711
TCGA.24.2271.01	cluster10	-0.074913	0.578994
TCGA.13.2057.01	cluster10	-0.0122419	0.625526
TCGA.04.1346.01	cluster10	0.00470818	0.604924
TCGA.59.2351.01	cluster10	-0.0720741	0.540688
TCGA.30.1860.01	cluster10	-0.0917139	0.54991
TCGA.29.1690.01	cluster10	-0.0947987	0.511967
TCGA.23.1123.01	cluster10	0.100716	0.530124
TCGA.24.2029.01	cluster10	0.0784693	0.488272
TCGA.13.1412.01	cluster10	0.0455642	0.537872
TCGA.36.2552.01	cluster10	0.045376	0.520048
TCGA.13.1817.01	cluster10	0.0319471	0.452005
TCGA.23.2079.01	cluster10	0.0205759	0.448739
TCGA.42.2593.01	cluster10	0.0412023	0.724966
TCGA.57.1994.01	cluster10	0.0384819	0.711561
TCGA.29.1784.01	cluster10	0.00764221	0.686336
TCGA.24.2261.01	cluster10	0.0552702	0.688871
TCGA.04.1349.01	cluster10	0.0548195	0.660322
TCGA.29.1781.01	cluster10	0.109495	0.700558
TCGA.24.1470.01	cluster10	0.0977568	0.703919
TCGA.29.2428.01	cluster10	0.0924035	0.732339
TCGA.24.1545.01	cluster10	0.0995943	0.660771
TCGA.13.0723.01	cluster10	0.114379	0.619035
TCGA.13.1484.01	cluster10	0.0452305	0.83809
TCGA.61.1727.01	cluster10	0.00873765	0.82733
TCGA.61.2094.01	cluster10	0.125924	0.855078
TCGA.61.1995.01	cluster10	-0.189102	0.54438
TCGA.13.0795.01	cluster10	-0.204259	0.551973
TCGA.61.2087.01	cluster10	-0.170378	0.532532
TCGA.30.1887.01	cluster10	-0.174466	0.586436
TCGA.13.0889.01	cluster10	-0.204452	0.514953
TCGA.30.1866.01	cluster10	-0.180512	0.487297
TCGA.10.0937.01	cluster10	-0.264132	0.543541
TCGA.61.1911.01	cluster10	-0.255437	0.526676
TCGA.09.2044.01	cluster10	-0.110308	0.470392
TCGA.29.1783.01	cluster10	-0.109947	0.461999
TCGA.36.1578.01	cluster10	-0.103719	0.450689
TCGA.04.1336.01	cluster10	-0.132929	0.443036
TCGA.29.1701.01	cluster10	-0.132138	0.431645
TCGA.13.0924.01	cluster10	-0.0671539	0.456717
TCGA.09.0366.01	cluster10	-0.108017	0.399769
TCGA.59.2349.01	cluster10	-0.243242	0.456999
TCGA.24.1843.01	cluster10	-0.22994	0.41157
TCGA.61.1917.01	cluster10	-0.272812	0.447679
TCGA.36.2539.01	cluster10	-0.290723	0.430936
TCGA.36.2547.01	cluster10	-0.28364	0.397743
TCGA.61.1904.01	cluster10	-0.288408	0.350554
TCGA.04.1343.01	cluster10	-0.1735	0.4242
TCGA.29.2432.01	cluster10	-0.195988	0.427408
TCGA.24.1104.01	cluster10	-0.181434	0.378421
TCGA.13.2060.01	cluster10	-0.467821	0.54051
TCGA.42.2590.01	cluster10	-0.4754	0.536897
TCGA.25.2396.01	cluster10	-0.421803	0.532351
TCGA.61.1915.01	cluster10	-0.522693	0.600945
TCGA.13.1496.01	cluster10	-0.406987	0.456682
TCGA.13.0764.01	cluster10	-0.385709	0.430515
TCGA.24.1553.01	cluster10	-0.143476	0.763416
TCGA.25.1878.01	cluster10	-0.133062	0.732284
TCGA.04.1357.01	cluster10	-0.152215	0.796792
TCGA.29.2427.01	cluster10	-0.0646818	0.775344
TCGA.29.1785.01	cluster10	-0.214887	0.825084
TCGA.24.2026.01	cluster10	-0.269501	0.641181
TCGA.13.0884.01	cluster10	-0.291988	0.633334
TCGA.13.0893.01	cluster10	-0.301673	0.660619
TCGA.61.1907.01	cluster10	-0.367946	0.748873

## Sheet: STable1d
Supplementary Table 1D. ConsensusTME GSVA scores and cluster annotation for PD1/Angiogenesis clusters.
SampleID	Cluster	B_cells	Cytotoxic_cells	Dendritic_cells	Eosinophils	Macrophages	Mast_cells	NK_cells	Neutrophils	T_cells_CD4	T_cells_CD8	T_cells_gamma_delta	T_regulatory_cells	Macrophages_M1	Macrophages_M2	Endothelial	Fibroblasts	Monocytes	Plasma_cells	Immune_Score
TCGA.30.1857.01	cluster1	0.235126	0.487257	0.325938	0.0150602	0.35256	0.588155	0.4658	0.138832	0.454729	0.454486	0.304502	0.497429	0.380774	0.379408	0.573008	0.625377	0.436545	-0.129953	0.403903
TCGA.10.0930.01	cluster1	0.548109	0.781702	0.390444	0.511442	0.440221	0.442127	0.594316	0.471748	0.516574	0.503084	0.566823	0.535463	0.303411	0.3455	-0.137776	0.12197	0.467994	0.0289229	0.447489
TCGA.30.1867.01	cluster1	0.594415	-0.212897	0.606776	0.765766	0.696951	0.703224	-0.10963	0.547709	0.42499	0.326246	0.000339059	0.357957	0.669633	0.726709	0.766636	0.811755	0.727296	0.26034	0.517687
TCGA.09.1668.01	cluster1	0.308593	0.68589	0.6192	0.532395	0.490483	0.444053	0.648368	0.367983	0.530794	0.572618	0.594626	0.696423	0.543274	0.454478	0.0117044	-0.000357641	0.379071	0.529063	0.488332
TCGA.09.1667.01	cluster1	0.342399	0.781776	0.505709	0.393924	0.383791	0.51531	0.707588	0.596729	0.502902	0.530803	0.700158	0.547357	0.428601	0.344389	-0.108286	0.0552739	0.368808	0.610916	0.458656
TCGA.23.2078.01	cluster1	0.602035	0.629068	0.458943	0.472268	0.318797	0.464997	0.609303	0.0992432	0.675332	0.684922	0.570964	0.754401	0.437007	0.185142	0.546177	0.547147	0.317105	0.651566	0.468926
TCGA.25.2401.01	cluster1	0.728127	0.429705	0.720351	0.778387	0.73234	0.683008	0.639774	0.736329	0.591247	0.602694	0.580141	0.668048	0.732138	0.75954	0.86567	0.606554	0.789794	0.586717	0.650336
TCGA.24.1564.01	cluster1	0.536834	0.303635	0.686644	0.675155	0.733174	0.805572	0.578854	0.804416	0.562643	0.618115	0.602124	0.413507	0.7312	0.858843	0.40117	-0.00189776	0.789662	0.514651	0.663482
TCGA.13.1411.01	cluster1	0.746376	0.821398	0.768327	0.745849	0.739935	0.798421	0.770393	0.806509	0.727435	0.74126	0.781935	0.733081	0.726906	0.817951	0.794546	0.694607	0.802749	0.702567	0.715063
TCGA.25.1626.01	cluster1	0.657517	0.71669	0.655332	0.816343	0.703172	0.836662	0.722207	0.792326	0.692712	0.708298	0.643116	0.70589	0.686952	0.784406	0.694173	0.849839	0.739075	0.555313	0.675252
TCGA.36.2529.01	cluster1	0.635485	0.586837	0.57451	0.696734	0.606588	0.674533	0.679477	0.624822	0.641407	0.64548	0.676744	0.615417	0.642455	0.560537	0.246635	-0.63004	0.583264	0.543093	0.609827
TCGA.31.1951.01	cluster1	0.504444	0.722121	0.605526	0.713801	0.59499	0.532586	0.62982	0.523742	0.59852	0.612285	0.6516	0.679895	0.655012	0.568436	0.278283	0.3317	0.621646	0.45981	0.579515
TCGA.13.2061.01	cluster1	0.444386	0.742147	0.639185	0.563308	0.648425	0.631743	0.660114	0.684892	0.548518	0.568683	0.678455	0.641951	0.626548	0.656413	-0.373442	-0.518594	0.652809	0.475911	0.588254
TCGA.13.1499.01	cluster1	0.643037	0.777725	0.552054	0.680913	0.321998	0.533802	0.729363	0.21274	0.790342	0.714024	0.699114	0.831991	0.389249	0.46836	0.672671	0.624652	0.474331	0.52584	0.570262
TCGA.31.1956.01	cluster1	0.782696	0.959781	0.819728	0.805054	0.801551	0.87886	0.880245	0.802047	0.850288	0.866991	0.871308	0.891209	0.771556	0.82608	0.838721	0.582502	0.814302	0.709357	0.791809
TCGA.31.1953.01	cluster1	0.808767	0.932857	0.746599	0.861991	0.703392	0.898485	0.906265	0.698966	0.772432	0.86136	0.88584	0.787357	0.685106	0.765901	0.322356	0.170019	0.787432	0.503972	0.733929
TCGA.13.0768.01	cluster1	0.704484	0.91873	0.728432	0.753326	0.651212	0.712731	0.853721	0.610575	0.78957	0.782735	0.824995	0.819753	0.691981	0.65328	0.859066	0.718719	0.688914	0.634085	0.70971
TCGA.25.1623.01	cluster1	0.658518	0.80024	0.702768	0.736199	0.703023	0.782954	0.750495	0.794436	0.757382	0.727085	0.723221	0.785817	0.696869	0.721628	0.0832654	0.777365	0.661428	0.759288	0.689018
TCGA.24.2035.01	cluster1	0.537104	0.727727	0.646931	0.696317	0.592415	0.574712	0.624696	0.751085	0.647801	0.651918	0.604087	0.649783	0.618214	0.634287	0.862858	0.71447	0.715931	0.502169	0.620074
TCGA.20.0987.01	cluster1	0.673198	0.838956	0.713556	0.681336	0.748281	0.795184	0.665331	0.782093	0.678764	0.684251	0.732284	0.648979	0.660097	0.726516	0.137066	-0.435688	0.753249	0.738681	0.700441
TCGA.61.1722.01	cluster1	0.580168	0.840452	0.680523	0.659187	0.552239	0.762675	0.801738	0.552864	0.702515	0.705383	0.791758	0.749769	0.617963	0.611557	0.268834	0.425669	0.61333	0.614348	0.627469
TCGA.24.2281.01	cluster1	0.500188	0.747549	0.670641	0.623677	0.646875	0.600094	0.689809	0.650077	0.588007	0.640607	0.713803	0.713275	0.620245	0.614466	-0.573871	-0.249824	0.632633	0.546048	0.598398
TCGA.61.1740.01	cluster1	0.530064	0.704172	0.59104	0.638927	0.574457	0.719684	0.623129	0.499493	0.67352	0.628994	0.651518	0.670412	0.61829	0.522649	0.467266	-0.229118	0.552439	0.57526	0.583291
TCGA.13.0886.01	cluster1	0.613253	0.606879	0.56363	0.659295	0.534337	0.610321	0.614138	0.293025	0.572556	0.656332	0.599745	0.557389	0.55632	0.626347	0.753698	0.657645	0.568587	0.549259	0.569094
TCGA.36.2544.01	cluster1	0.265018	0.687059	0.546276	0.317371	0.53782	0.258848	0.646909	0.388929	0.612513	0.619963	0.712511	0.741796	0.532659	0.535849	-0.493272	-0.471075	0.456762	0.441328	0.488645
TCGA.24.1847.01	cluster1	0.610655	0.970251	0.672683	0.765129	0.668764	0.680925	0.87002	0.68553	0.790572	0.815114	0.843792	0.776884	0.700798	0.715705	0.0842183	-0.277542	0.693134	0.504408	0.703356
TCGA.61.2002.01	cluster1	0.659523	0.82971	0.707647	0.68519	0.635844	0.795206	0.785331	0.676989	0.711412	0.694122	0.75308	0.748153	0.692832	0.682676	0.142679	0.530917	0.697503	0.540627	0.684139
TCGA.20.0991.01	cluster1	0.706953	0.883164	0.772687	0.801931	0.776476	0.834067	0.849186	0.808731	0.80207	0.784634	0.897192	0.879966	0.771959	0.833327	0.133502	-0.721615	0.79787	0.81117	0.767891
TCGA.24.1849.01	cluster1	0.646081	0.833056	0.713059	0.687616	0.601117	0.619395	0.73329	0.724731	0.727356	0.749322	0.746361	0.760612	0.656157	0.651675	0.775472	0.675848	0.746951	0.434368	0.678677
TCGA.13.2065.01	cluster1	0.628407	0.655892	0.538438	0.583489	0.507463	0.66925	0.668563	0.459944	0.642691	0.669476	0.645846	0.686657	0.556683	0.439419	0.572031	0.428661	0.395459	0.597098	0.54264
TCGA.31.1944.01	cluster1	0.299891	-0.0832284	0.118858	0.395545	0.118197	0.144209	0.0914958	0.211077	0.157462	0.0827404	0.207427	0.128753	0.155447	-0.13939	0.77169	0.501684	0.182149	0.414695	0.140258
TCGA.13.0916.01	cluster1	-0.158489	0.325234	-0.265733	0.00748464	-0.258855	0.0485251	0.217636	-0.43904	0.1429	0.150812	0.15556	0.300672	0.0666798	-0.172414	0.261644	-0.747227	-0.317692	-0.417899	-0.0445268
TCGA.24.2288.01	cluster1	0.653596	0.77609	0.596729	0.601773	0.490088	0.587246	0.685291	0.417532	0.662035	0.641687	0.593891	0.677905	0.576461	0.431046	0.644455	0.0397388	0.462725	0.55841	0.546139
TCGA.29.1768.01	cluster1	0.483607	0.784516	0.606836	0.593381	0.549511	0.327957	0.661016	0.53196	0.55115	0.63512	0.659133	0.603317	0.56918	0.611684	0.535325	0.765855	0.55564	0.589095	0.598418
TCGA.59.2354.01	cluster1	0.386344	0.808981	0.51289	0.568187	0.527273	0.66398	0.678459	0.484765	0.641766	0.680657	0.62847	0.73201	0.503401	0.625829	0.582513	0.699877	0.611488	0.556631	0.575325
TCGA.23.1117.01	cluster1	0.260031	0.532602	0.406732	0.361689	0.294071	0.46545	0.403287	0.299847	0.491258	0.467263	0.454418	0.521057	0.380905	0.411754	0.676249	0.762562	0.427847	0.0152355	0.400593
TCGA.61.1919.01	cluster1	0.525138	0.441977	0.639896	0.742132	0.580331	0.762858	0.510388	0.616881	0.480648	0.48969	0.506221	0.55166	0.608764	0.662899	0.51528	0.730045	0.550221	0.717316	0.53364
TCGA.25.2042.01	cluster1	0.447133	0.416552	0.55259	0.699091	0.48935	0.59766	0.393256	0.685449	0.486495	0.500057	0.341951	0.464897	0.405165	0.575831	0.934978	0.858536	0.628518	0.491831	0.504075
TCGA.24.1417.01	cluster1	0.65798	0.777482	0.633735	0.663009	0.515216	0.8285	0.757289	0.66055	0.658018	0.671144	0.717068	0.794572	0.623211	0.64929	0.66696	0.480985	0.551275	0.819358	0.621269
TCGA.61.1903.01	cluster1	0.497446	0.450676	0.481799	0.629975	0.446294	0.543281	0.537194	0.672	0.437662	0.43746	0.425959	0.541337	0.394953	0.551522	-0.016866	-0.49659	0.588784	0.413815	0.467434
TCGA.30.1718.01	cluster1	0.460414	0.03648	0.32873	0.158355	0.427215	0.25118	0.137296	0.00973604	0.370835	0.305286	0.220364	0.311831	0.346688	0.185611	0.363399	0.630684	0.219808	0.474424	0.320285
TCGA.25.1630.01	cluster1	0.594927	-0.0616586	0.543332	0.713316	0.583862	0.815848	0.193342	0.786799	0.221857	0.177217	0.214979	-0.0334292	0.536605	0.680139	0.442958	0.00955864	0.67901	0.0351507	0.482668
TCGA.61.2003.01	cluster1	0.573648	0.617073	0.643135	0.702015	0.638336	0.629188	0.63007	0.502209	0.519852	0.601164	0.523829	0.375964	0.624142	0.69686	0.653623	0.624295	0.661928	-0.117617	0.571416
TCGA.13.0911.01	cluster1	0.443861	0.118307	0.706604	0.737283	0.745634	0.732737	0.231036	0.646861	0.373681	0.39888	0.173788	0.260367	0.697853	0.722934	0.387365	0.723296	0.718134	0.488643	0.567963
TCGA.23.2641.01	cluster1	0.621427	0.520442	0.719022	0.699858	0.634819	0.526893	0.470593	0.731791	0.603975	0.617659	0.511516	0.617121	0.667224	0.755931	0.840784	0.735194	0.763421	0.471377	0.629307
TCGA.23.2649.01	cluster1	0.234105	0.534179	0.368092	0.285517	-0.0368298	0.212299	0.43173	0.0391068	0.321327	0.31547	0.452469	0.278299	0.259344	-0.00467399	0.456869	-0.0625427	0.0850642	0.631218	0.306473
TCGA.61.2095.01	cluster1	0.585234	0.745458	0.534422	0.599011	0.580213	0.416952	0.412731	0.573018	0.350389	0.391164	0.385159	0.147931	0.43816	0.617817	0.0667711	0.383624	0.67674	-0.10763	0.45722
TCGA.29.1764.01	cluster1	0.445944	0.537643	0.52465	0.53515	0.406019	0.35134	0.579526	0.609174	0.520213	0.551779	0.546032	0.473936	0.450025	0.443378	0.726541	0.708596	0.453313	0.284875	0.46111
TCGA.13.0908.01	cluster1	0.39946	-0.286115	0.535782	0.418397	0.549993	0.771001	0.297639	0.491142	0.443838	0.444223	0.355987	0.406093	0.565036	0.519311	0.741643	0.632731	0.501939	0.42602	0.502895
TCGA.13.0761.01	cluster1	0.0718684	0.68876	0.393996	0.478474	0.425444	0.438651	0.476723	0.479568	0.18517	0.351044	0.390482	0.0868743	0.377174	0.494966	0.432853	-0.444846	0.437465	-0.0575124	0.35558
TCGA.09.2053.01	cluster1	0.320678	0.620062	0.266994	0.107829	0.225588	-0.0599663	0.329423	-0.190518	0.355054	0.340715	0.464418	0.279155	0.384955	0.119735	-0.424661	-0.26313	0.208888	0.259834	0.269028
TCGA.29.1704.01	cluster1	0.727814	0.602543	0.60913	0.69232	0.613296	0.704695	0.643393	0.58831	0.617236	0.618627	0.676989	0.637417	0.70234	0.561061	0.0569593	-0.662561	0.525941	0.587731	0.598606
TCGA.61.1913.01	cluster1	0.292377	0.651072	0.422725	0.26298	0.18354	0.431159	0.576618	0.386626	0.513537	0.49927	0.544437	0.610322	0.260622	0.227096	-0.346938	-0.473474	0.0657994	0.391963	0.343053
TCGA.20.1682.01	cluster1	0.455851	0.642085	0.425914	0.543898	0.186029	0.0877441	0.37642	0.482015	0.51322	0.506633	0.401726	0.48794	0.200767	0.23589	0.558141	0.571879	0.281164	0.516721	0.377031
TCGA.04.1365.01	cluster1	0.0679189	0.629283	0.565253	0.428398	0.539077	0.459246	0.577171	0.565506	0.493312	0.554071	0.64	0.565363	0.58345	0.603008	-0.0286018	-0.456355	0.484465	0.492893	0.487861
TCGA.24.1427.01	cluster1	0.497557	0.151612	0.495594	0.544752	0.413042	0.528664	0.246651	0.436879	0.476627	0.496723	0.335482	0.5214	0.368484	0.502494	0.509359	0.772504	0.434833	0.554438	0.470422
TCGA.24.2293.01	cluster1	0.624489	0.537145	0.736544	0.704073	0.638347	0.56961	0.500864	0.778624	0.617128	0.61684	0.559119	0.604131	0.668274	0.713629	0.858235	0.732666	0.744769	0.49713	0.635471
TCGA.61.2012.01	cluster1	0.629353	0.651409	0.589757	0.587316	0.569588	0.640005	0.584112	0.633109	0.629735	0.539111	0.627698	0.715152	0.626485	0.586554	-0.417188	-0.52185	0.555686	0.467346	0.542824
TCGA.04.1338.01	cluster1	0.340077	0.740299	0.502502	0.648069	0.481815	0.578018	0.663487	0.540052	0.578862	0.643476	0.685532	0.645669	0.524263	0.490403	0.582889	0.544038	0.508348	0.511925	0.537291
TCGA.13.0894.01	cluster1	0.171809	0.320299	0.195146	0.15402	0.261293	0.334718	0.363195	-0.0806936	0.369005	0.429942	0.383964	0.445409	0.269302	0.274498	0.460111	0.714072	0.410346	0.281041	0.306893
TCGA.23.1116.01	cluster1	0.554061	0.313435	0.655114	0.730654	0.700496	0.723154	0.514851	0.830094	0.539031	0.552873	0.516218	0.453057	0.650857	0.788675	0.687397	0.654659	0.708727	0.363602	0.617572
TCGA.29.1695.01	cluster1	0.391172	0.456728	0.579476	0.644999	0.60254	0.606301	0.219463	0.628297	0.326496	0.272647	0.401015	0.256663	0.627885	0.651551	0.550989	0.330605	0.582606	-0.102445	0.418982
TCGA.25.1628.01	cluster1	0.477714	0.72991	0.543227	0.671159	0.53366	0.654865	0.675525	0.433721	0.627082	0.620254	0.67134	0.632219	0.584402	0.635204	0.0451619	0.761142	0.492479	0.589346	0.555895
TCGA.61.2113.01	cluster1	0.319399	0.306544	0.496336	0.590857	0.522288	0.561113	0.526071	0.471293	0.379214	0.437772	0.528215	0.439972	0.489793	0.43957	0.715357	0.559751	0.501136	0.243627	0.466623
TCGA.36.1576.01	cluster1	0.549928	0.666472	0.643294	0.685036	0.570352	0.521682	0.644312	0.617166	0.643068	0.666831	0.639471	0.598647	0.616502	0.662475	0.576109	0.808431	0.608738	0.641309	0.593349
TCGA.13.0807.01	cluster2	-0.256606	0.325447	-0.303527	-0.347219	-0.301876	-0.0950795	-0.0286396	-0.208384	0.0299292	-0.0903415	-0.0815928	0.10366	-0.332077	-0.480315	0.080333	0.543316	-0.421874	0.136828	-0.241023
TCGA.24.1418.01	cluster2	-0.275552	-0.412416	-0.128428	-0.0378908	-0.235436	-0.309641	-0.330407	-0.224683	-0.233053	-0.215704	-0.295178	-0.0850713	-0.251748	-0.316197	-0.011883	0.498194	-0.307273	0.0469102	-0.240756
TCGA.13.0762.01	cluster2	0.0395846	0.0992189	-0.31371	-0.480407	-0.412836	-0.385088	-0.112585	-0.4334	-0.181764	-0.139749	-0.113098	-0.0740049	-0.32689	-0.324854	-0.386763	0.0718976	-0.323945	-0.536417	-0.319576
TCGA.13.0714.01	cluster2	0.138831	0.508102	-0.00262367	-0.257657	-0.220992	-0.200045	0.208229	-0.233662	0.32259	0.352647	0.307382	0.231992	-0.286539	-0.146062	0.43131	0.474805	0.091713	-0.0914229	0.0842502
TCGA.13.0726.01	cluster2	-0.451049	0.496386	-0.342603	-0.405197	-0.272568	-0.284318	0.110799	-0.333436	-0.0213271	0.103853	0.188089	0.0736952	-0.349828	-0.342346	-0.685034	-0.398753	-0.269498	-0.189467	-0.202623
TCGA.29.2425.01	cluster2	-0.461158	0.341368	-0.26573	-0.428833	-0.190926	-0.0295921	-0.143305	-0.384206	-0.242863	-0.286696	-0.299929	-0.0696922	-0.160236	-0.39655	-0.193822	0.113872	-0.343698	-0.32811	-0.33586
TCGA.24.2019.01	cluster2	-0.427842	0.339618	-0.218392	-0.136334	-0.367741	-0.473489	-0.118691	-0.306384	-0.0363743	-0.0934768	0.0335433	-0.135594	-0.226496	-0.38572	0.0657356	-0.171889	-0.325991	-0.476894	-0.223485
TCGA.13.0901.01	cluster2	-0.274291	-0.555195	-0.176315	-0.204294	-0.00595872	-0.139593	-0.383847	0.112624	-0.276272	-0.299973	-0.499773	-0.183295	-0.0700355	-0.168503	0.55808	0.535213	-0.193439	-0.157181	-0.259001
TCGA.36.2540.01	cluster2	-0.262641	0.354318	-0.0964648	-0.295828	-0.12223	-0.179975	-0.0874437	-0.412607	-0.0775784	-0.085017	-0.0906744	-0.0780171	-0.0358593	-0.093895	0.674938	0.0601756	-0.0823856	-0.271704	-0.109592
TCGA.24.0970.01	cluster2	-0.263137	-0.660113	-0.347495	-0.202065	-0.00536021	-0.226619	-0.550874	-0.339887	-0.439742	-0.399594	-0.54905	-0.369827	-0.131394	-0.0492927	-0.0624896	0.469584	-0.179257	-0.0247878	-0.314934
TCGA.13.1510.01	cluster2	-0.432009	-0.0467841	-0.373484	-0.513589	-0.485654	-0.578729	-0.0593292	-0.428858	-0.219931	-0.272407	-0.101404	0.0931962	-0.533951	-0.600177	-0.475219	-0.21713	-0.489896	-0.332513	-0.372187
TCGA.13.0804.01	cluster2	0.250519	0.574456	0.229596	0.215076	0.187107	-0.228137	0.455842	0.458192	0.344393	0.36622	0.341527	0.204971	0.127086	0.203916	0.510927	-0.141805	0.508347	-0.0847105	0.290269
TCGA.04.1351.01	cluster2	-0.543326	-0.479724	-0.515266	-0.518223	-0.537798	-0.634102	-0.443355	-0.628671	-0.41558	-0.428516	-0.494904	-0.412073	-0.525524	-0.556131	0.343659	0.27739	-0.556379	-0.296495	-0.490544
TCGA.23.1031.01	cluster2	-0.452581	-0.71111	-0.655327	-0.584542	-0.608381	-0.593966	-0.526072	-0.580634	-0.52692	-0.519168	-0.527719	-0.553246	-0.642462	-0.577055	-0.377777	-0.114495	-0.476832	-0.344401	-0.539726
TCGA.61.1914.01	cluster2	0.310415	-0.0854246	0.336476	0.453748	0.373892	0.0798384	0.0282077	0.332994	-0.13022	-0.144467	0.0258063	-0.208701	0.339195	0.405108	0.173591	-0.238528	0.209651	0.477628	0.200113
TCGA.09.1662.01	cluster2	0.285541	0.622154	0.424254	0.449864	0.336365	0.254242	0.538869	0.506568	0.244275	0.388369	0.420786	0.0164342	0.191943	0.494357	0.0157886	0.225477	0.508095	-0.480355	0.338282
TCGA.24.1563.01	cluster2	0.22981	0.0561824	0.274015	0.529597	0.227895	0.112375	0.41871	0.545793	0.165601	0.296551	0.297071	0.308811	0.0890218	0.443095	0.52362	0.743004	0.315204	0.633649	0.301707
TCGA.23.1120.01	cluster2	0.0783263	0.597647	0.502084	0.388218	0.416371	0.461814	0.560009	0.240399	0.439726	0.452017	0.49525	0.388581	0.480675	0.512533	0.229989	0.155976	0.35152	-0.243016	0.411838
TCGA.13.0797.01	cluster2	-0.160037	0.249367	-0.140286	0.0265051	-0.267202	-0.103365	0.220861	-0.0116309	0.272849	0.0920015	0.213826	0.191716	-0.198716	-0.299136	-0.382595	-0.63877	0.035617	-0.322235	0.0453551
TCGA.13.0903.01	cluster2	0.0128307	0.299983	-0.337413	-0.327014	-0.330938	-0.267394	-0.0608103	-0.477364	-0.212452	-0.119955	-0.190776	-0.0484925	-0.248198	-0.408585	0.044125	-0.145208	-0.367494	-0.0344124	-0.230154
TCGA.13.1497.01	cluster2	-0.231386	-0.345462	-0.201831	-0.0633454	-0.176827	-0.0457831	-0.249055	-0.37525	-0.0734777	-0.214082	-0.151469	-0.061039	-0.085254	-0.103639	0.485273	-0.0885626	-0.427517	0.462066	-0.220018
TCGA.30.1892.01	cluster2	0.0164657	-0.0240984	-0.0411918	-0.0508399	-0.160142	0.292756	0.220088	0.240667	0.0905949	0.1022	0.184258	-0.0233587	-0.235668	-0.136973	0.64976	0.747125	0.0151601	0.178513	0.007321
TCGA.13.0758.01	cluster2	0.233086	0.701064	0.0865105	-0.0205816	0.0545655	0.285505	0.471509	0.0768689	0.268124	0.354282	0.536868	0.244565	0.193466	0.0391853	0.285745	0.0464075	-0.0915116	0.231919	0.223722
TCGA.13.0906.01	cluster2	-0.0341701	-0.289929	-0.488083	-0.235395	-0.373916	-0.221622	-0.217529	-0.487723	-0.457137	-0.432	-0.410681	-0.32419	-0.210897	-0.486359	-0.700432	-0.590427	-0.470773	-0.517473	-0.398567
TCGA.24.1567.01	cluster2	-0.623145	-0.592036	-0.628751	-0.46277	-0.54845	-0.614658	-0.565336	-0.655209	-0.582561	-0.552265	-0.557966	-0.544433	-0.616533	-0.523912	-0.558861	-0.371905	-0.60389	-0.601572	-0.527811
TCGA.61.1916.02	cluster2	-0.179248	0.354799	0.013169	-0.117658	-0.01144	-0.074865	-0.0276837	-0.402948	0.0110974	-0.0414851	0.0252421	0.0212094	-0.0101711	-0.0510576	0.693464	-0.0435483	-0.0972156	-0.45232	-0.0682088
TCGA.59.2348.01	cluster2	0.396174	-0.122034	0.102101	0.0599139	0.214671	0.0541753	-0.12206	0.238754	-0.218083	-0.0543396	0.019176	-0.0474739	0.213749	0.0357325	0.630708	-0.149954	0.174955	0.269556	0.0391296
TCGA.23.1027.01	cluster2	0.102101	-0.394133	0.370981	0.25048	0.402943	0.312271	-0.142256	0.365956	-0.166685	-0.0181494	-0.438691	-0.281171	0.395333	0.476324	-0.251487	0.311985	0.386114	0.0570734	0.214857
TCGA.24.1424.01	cluster2	-0.135819	-0.54015	-0.235844	0.0788737	-0.195633	-0.33224	-0.40261	0.104854	-0.47509	-0.347438	-0.296663	-0.429851	-0.1614	0.00309924	0.635533	0.075274	-0.27098	-0.640963	-0.283955
TCGA.30.1859.01	cluster2	-0.208776	-0.0708077	-0.0620024	-0.150319	-0.309797	-0.139344	-0.0129961	-0.256499	-0.0564392	-0.0521244	0.0388843	-0.116254	-0.393214	-0.313273	-0.54583	0.295238	-0.146063	-0.586797	-0.246439
TCGA.24.0982.01	cluster2	-0.504095	-0.524634	-0.533451	-0.636315	-0.619298	-0.811729	-0.43399	-0.603569	-0.329798	-0.325647	-0.288514	-0.369877	-0.511417	-0.644355	-0.00257603	0.543847	-0.521753	-0.0892598	-0.452914
TCGA.13.1410.01	cluster2	0.186962	-0.32188	0.350031	0.248399	0.121426	0.233653	-0.0167213	0.0467568	0.132526	0.216573	0.114041	0.281703	0.417745	0.237907	0.336042	0.349086	0.207863	0.444128	0.229035
TCGA.13.0727.01	cluster2	-0.331668	-0.692743	-0.23518	-0.378595	-0.25415	-0.569545	-0.636928	-0.306368	-0.396699	-0.454468	-0.487121	-0.439954	-0.309267	-0.264848	-0.629517	-0.383039	0.0815745	-0.559051	-0.34236
TCGA.25.2393.01	cluster2	-0.223678	-0.422693	-0.252611	0.201162	-0.250152	-0.185063	-0.303323	0.247363	-0.314505	-0.387723	-0.391921	-0.403409	-0.351924	-0.268901	-0.247709	-0.453085	-0.0642822	-0.491254	-0.298008
TCGA.25.1314.01	cluster2	0.0687861	0.0853415	-0.0798182	-0.496679	-0.341833	0.0468633	0.0729739	-0.310676	-0.0616511	0.149402	-0.0741261	-0.0718427	-0.317193	-0.22524	0.359436	0.219969	-0.365599	-0.0130444	-0.185592
TCGA.13.0905.01	cluster2	-0.156696	-0.580522	-0.525607	-0.200619	-0.414328	-0.446983	-0.427208	-0.433248	-0.278606	-0.348241	-0.436014	-0.152863	-0.354244	-0.487467	-0.418397	-0.534849	-0.564069	0.123204	-0.331397
TCGA.13.0920.01	cluster2	-0.493403	-0.424653	-0.562294	-0.61883	-0.519716	-0.65414	-0.521002	-0.642183	-0.463301	-0.517723	-0.501539	-0.381321	-0.450429	-0.696431	-0.461291	-0.262485	-0.623126	-0.356305	-0.515845
TCGA.24.1466.01	cluster2	-0.113236	-0.55224	-0.266614	-0.222697	0.171602	-0.201371	-0.383248	-0.264839	-0.273624	-0.305104	-0.164121	-0.203827	0.00256937	-0.10788	-0.501323	-0.385982	0.0670937	-0.00835704	-0.149558
TCGA.09.1665.01	cluster2	0.00968863	0.0384743	-0.0466752	0.148062	-0.20795	0.177413	0.094192	-0.04266	0.236836	0.030852	0.139404	-0.0100194	-0.184937	-0.173618	0.269468	0.107555	-0.320515	0.0194481	-0.0474953
TCGA.23.1030.01	cluster2	-0.33433	-0.131099	0.105717	-0.325366	-0.152728	-0.2061	-0.170122	-0.331567	-0.146364	-0.17084	-0.329714	-0.0519502	-0.263753	-0.31741	0.25613	-0.358929	-0.289027	-0.526788	-0.204659
TCGA.25.1877.01	cluster2	-0.0702703	0.209952	0.0117327	-0.101259	-0.269499	-0.0470295	0.123031	0.287188	0.180625	0.0485824	0.080541	0.191635	-0.220103	-0.0117336	-0.226617	0.409928	-0.20944	-0.258285	-0.0420919
TCGA.13.0725.01	cluster2	0.230851	-0.334304	0.0456985	0.0823367	0.175473	-0.168362	-0.219738	0.331409	-0.0906011	-0.138717	-0.0403448	0.0410296	-0.115485	0.314554	0.490584	0.361174	0.302718	0.21778	0.148758
TCGA.25.1635.01	cluster2	0.341511	0.460493	0.315399	0.513938	0.432962	0.488832	0.502872	0.382915	0.39294	0.392244	0.439061	0.339607	0.415764	0.519653	0.353956	0.767351	0.411007	0.103466	0.404622
TCGA.24.1920.01	cluster2	0.0185447	0.531034	0.115038	0.348159	-0.0718511	0.000982886	0.246208	0.414552	0.159585	0.154446	0.244309	0.021335	0.0832778	-0.000598958	0.214416	-0.353349	0.237051	-0.550084	0.144579
TCGA.04.1646.01	cluster2	-0.503577	-0.485075	-0.625497	-0.625969	-0.509501	-0.822393	-0.571944	-0.458572	-0.543027	-0.489683	-0.50108	-0.571424	-0.546316	-0.591374	-0.28359	-0.753758	-0.520659	-0.514108	-0.506395
TCGA.61.1728.01	cluster2	-0.175493	-0.445217	-0.196583	-0.45142	-0.00805452	0.00318662	-0.331113	0.0123152	-0.257177	-0.250803	-0.0991227	-0.137186	-0.226945	0.0393511	-0.268275	0.242374	-0.219245	-0.401704	-0.275001
TCGA.29.1777.01	cluster2	0.447221	0.446459	0.321755	0.326926	-0.00980759	0.175253	0.345958	0.421371	0.304883	0.223138	0.256875	0.33728	0.0863333	0.0938946	0.351455	0.694539	0.135821	0.197673	0.210099
TCGA.24.1436.01	cluster2	0.237068	0.611358	0.393418	0.467843	0.348813	0.369436	0.426882	0.360446	0.333449	0.368024	0.434211	0.277371	0.310655	0.424494	0.417702	-0.494039	0.387616	0.16323	0.366965
TCGA.23.2072.01	cluster2	-0.343613	0.178981	-0.400207	-0.321259	-0.325414	-0.610768	-0.164524	-0.302017	-0.279612	-0.120099	-0.115711	-0.301672	-0.380898	-0.269922	-0.392399	-0.42697	-0.000682291	-0.442893	-0.257023
TCGA.61.1736.01	cluster2	0.218404	0.175253	0.296783	0.509402	0.280948	-0.0342112	0.0685752	0.452134	0.163331	0.105693	-0.0283689	0.0280533	0.122327	0.15309	0.603311	-0.211366	0.525704	0.217185	0.253346
TCGA.30.1862.01	cluster2	0.11192	-0.35022	-0.0186562	0.289052	-0.105469	-0.22837	0.103843	-0.000656788	0.0206127	0.0908849	0.105515	0.176559	0.00667008	-0.279297	0.389753	0.55492	-0.00445625	0.559028	0.0223969
TCGA.25.1316.01	cluster2	-0.183164	0.448782	-0.435335	-0.62646	-0.528412	-0.408986	0.307618	-0.567105	0.0503182	0.10065	0.0542471	0.0855941	-0.457094	-0.467821	-0.652057	-0.218015	-0.558023	-0.372198	-0.309688
TCGA.13.1495.01	cluster2	-0.370368	-0.302229	-0.419692	-0.303647	-0.407897	-0.666133	-0.302478	-0.552353	-0.40267	-0.48077	-0.387153	-0.494637	-0.36724	-0.628626	-0.494326	-0.130164	-0.482797	0.0778757	-0.383256
TCGA.24.1928.01	cluster2	-0.221364	-0.356342	-0.0166561	0.298736	0.303547	-0.092078	-0.2904	-0.203002	-0.0761945	0.0387244	-0.114024	-0.0697963	0.332654	0.0517038	0.719809	0.339614	0.221234	0.0131594	0.0783152
TCGA.57.1586.01	cluster2	-0.111842	-0.463495	-0.331277	-0.369826	-0.310314	-0.198431	-0.386927	-0.491418	-0.303672	-0.386707	-0.26627	-0.41904	-0.265349	-0.28581	-0.765133	-0.627212	-0.334401	-0.218706	-0.319957
TCGA.13.0800.01	cluster2	-0.791849	-0.768406	-0.764234	-0.80484	-0.740596	-0.893562	-0.732582	-0.714172	-0.683867	-0.713006	-0.706125	-0.761021	-0.760739	-0.799779	-0.667324	-0.569038	-0.753275	-0.628619	-0.680474
TCGA.29.1699.01	cluster3	0.561749	0.547747	0.564382	0.515784	0.541963	0.658497	0.48023	0.533003	0.469152	0.521701	0.58468	0.421228	0.614505	0.563947	0.536787	-0.61976	0.592089	0.289582	0.52873
TCGA.59.2372.01	cluster3	0.24901	0.377492	0.255654	0.112294	-0.187126	0.191411	0.405144	-0.0765149	0.384967	0.177743	0.258039	0.441283	0.0790847	-0.196506	-0.225705	-0.225484	-0.364005	0.256687	0.136046
TCGA.24.1565.01	cluster3	0.324765	0.35455	0.153778	0.165085	0.277811	-0.138823	0.49558	0.3606	0.345602	0.401518	0.381603	0.0668877	0.321943	0.323148	-0.637867	-0.761977	0.539127	-0.255677	0.355562
TCGA.24.1464.01	cluster3	-0.0825966	0.605544	-0.127456	-0.304105	-0.0297993	0.39492	0.499049	-0.366783	0.0557346	0.239718	0.363177	0.0610068	-0.080032	0.194187	-0.552441	-0.439299	-0.133093	0.214657	-0.0167077
TCGA.29.2436.01	cluster3	-0.0879373	0.485553	0.0863108	-0.023836	0.0701398	0.362438	0.479523	0.084186	0.245918	0.257517	0.417304	0.162973	0.33129	0.193536	-0.0766163	-0.145707	-0.0933495	-0.137853	0.179127
TCGA.13.0904.01	cluster3	-0.317691	0.24705	-0.0850545	-0.352748	-0.191228	-0.419034	-0.0909469	-0.114342	-0.0179033	-0.0997831	-0.161896	-0.0879884	-0.232359	-0.277872	0.097019	-0.194176	-0.00955571	-0.461664	-0.158581
TCGA.04.1361.01	cluster3	-0.115708	-0.0248463	-0.18646	0.289051	-0.0678507	-0.160792	0.0444018	-0.276619	0.074235	-0.0467273	-0.0394671	0.0322983	-0.0788376	0.100646	0.1959	-0.0631382	-0.0290676	0.0571034	0.0498332
TCGA.30.1880.01	cluster3	0.372866	0.569485	0.110331	0.138934	-0.112474	-0.00108018	0.382689	0.0804097	0.380857	0.421495	0.422702	0.410551	-0.0108029	0.13851	-0.251729	0.574622	0.102623	-0.204873	0.177577
TCGA.29.1776.01	cluster3	0.18534	-0.391584	-0.100961	-0.0212005	-0.292822	-0.0220074	-0.260853	-0.335814	-0.196735	-0.231106	-0.204254	-0.153515	-0.310305	-0.303063	-0.273941	0.572199	-0.425887	0.217732	-0.175955
TCGA.04.1638.01	cluster3	-0.193381	0.310528	-0.461594	-0.52344	-0.547745	-0.617233	-0.12074	-0.520062	-0.193171	-0.239209	0.0189842	-0.10073	-0.507813	-0.535506	-0.502156	-0.2713	-0.557032	-0.338261	-0.383618
TCGA.29.1761.01	cluster3	0.19361	0.414084	0.223303	0.156219	0.242194	0.514761	0.363307	0.377982	0.0676512	0.161486	0.388087	0.115587	0.12919	0.368367	-0.164128	-0.406613	0.350859	-0.366705	0.207115
TCGA.13.0921.01	cluster3	-0.0801615	0.54695	-0.0735817	-0.263828	-0.247921	-0.100242	0.366842	-0.143289	0.281507	0.301182	0.363862	0.28309	-0.381576	-0.381339	-0.209492	-0.0474607	-0.182033	0.101363	0.00418681
TCGA.13.0923.01	cluster3	-0.270453	0.0936173	-0.318707	-0.380212	-0.2312	-0.101782	-0.0478544	-0.40489	-0.238532	-0.146087	-0.0428131	-0.124595	-0.0690199	-0.427377	-0.303925	-0.751888	-0.417841	0.160465	-0.221269
TCGA.61.1906.01	cluster3	-0.241571	-0.0820176	-0.160523	-0.241606	-0.414306	-0.475338	-0.115727	0.235005	-0.147717	-0.168969	0.0609745	-0.154643	-0.329815	-0.400336	0.0395364	0.117312	-0.336192	-0.0155419	-0.218648
TCGA.09.2051.01	cluster3	0.515528	0.574051	0.409088	0.342524	0.388189	0.539005	0.430501	0.50357	0.349074	0.347274	0.291531	0.383093	0.42668	0.428241	-0.0614634	-0.360146	0.218394	-0.129779	0.364318
TCGA.24.2038.01	cluster3	-0.117758	-0.323954	-0.32956	-0.292468	-0.428248	-0.750954	-0.314984	-0.354974	-0.313317	-0.368515	-0.474398	-0.236822	-0.446513	-0.533577	-0.438875	-0.362862	-0.312781	-0.575979	-0.361456
TCGA.09.1672.01	cluster3	-0.00991141	0.0559249	-0.0626887	-0.206009	0.145643	-0.301907	0.0306534	-0.0165278	0.0480808	0.0752611	0.0891521	0.135276	-0.136248	0.124753	0.0135271	-0.0886085	0.124184	-0.221923	0.0469638
TCGA.10.0936.01	cluster3	-0.228169	-0.136779	-0.278394	-0.500131	-0.277673	-0.0651266	0.00237905	-0.23709	-0.0712045	0.00463255	-0.0738328	0.141396	-0.224051	-0.181681	-0.59307	-0.741623	-0.358334	0.507908	-0.142563
TCGA.24.2023.01	cluster3	-0.0372098	0.532044	-0.0849325	0.37251	-0.00664336	0.283965	0.402706	0.00218083	0.0206208	0.176748	0.329496	0.0130066	0.0177067	-0.143903	-0.630277	-0.649654	-0.206821	0.09375	-0.0284947
TCGA.25.1324.01	cluster3	-0.407637	-0.360618	-0.454698	-0.551327	-0.503004	-0.456349	-0.324649	-0.591185	-0.169766	-0.31692	-0.393388	-0.105337	-0.443092	-0.487494	-0.607976	-0.482308	-0.625218	-0.533454	-0.441759
TCGA.04.1367.01	cluster3	-0.0409814	-0.151903	-0.053039	0.0927004	0.105676	-0.132437	-0.0913767	-0.113484	-0.00136826	-0.00763608	-0.0344573	0.170432	0.0368095	-0.0875352	-0.332611	-0.201951	0.0943029	-0.0384893	0.00674684
TCGA.31.1950.01	cluster3	0.250802	-0.0113844	0.211185	-0.174014	0.210176	0.378921	0.135708	0.18195	0.179525	0.0912068	0.186636	0.00108126	0.33227	0.211202	0.046151	-0.747399	0.163831	0.173124	0.228221
TCGA.61.2111.01	cluster3	0.329042	0.183065	0.230177	0.0142898	0.278072	-0.316519	0.255617	0.0832021	0.000472972	0.138898	0.174638	0.266683	0.212811	0.336423	-0.0563246	-0.0408674	0.081833	-0.0546089	0.0934373
TCGA.13.0755.01	cluster3	0.0875208	0.613096	0.345631	0.249994	0.0502822	0.0209389	0.592491	0.428932	0.283182	0.420113	0.523557	0.405552	0.133958	0.232551	-0.385443	0.131263	0.097549	0.179494	0.277534
TCGA.29.1691.01	cluster3	-0.3509	-0.367437	-0.29612	-0.302975	-0.0650915	-0.143332	-0.38745	-0.0178831	-0.375457	-0.48466	-0.404187	-0.396019	-0.065912	-0.0217025	-0.160589	-0.497196	-0.250306	-0.576054	-0.293504
TCGA.23.1022.01	cluster3	-0.433027	-0.599996	-0.576952	-0.589912	-0.56616	-0.571289	-0.537933	-0.520134	-0.494021	-0.480824	-0.529428	-0.485974	-0.559157	-0.53482	-0.424067	-0.328169	-0.503471	-0.5152	-0.492378
TCGA.04.1350.01	cluster3	-0.681221	-0.52013	-0.700246	-0.754174	-0.632295	-0.760864	-0.537115	-0.64788	-0.622011	-0.567177	-0.56204	-0.593871	-0.67978	-0.707078	-0.783974	-0.652166	-0.680449	-0.597772	-0.648428
TCGA.42.2588.01	cluster3	0.397408	0.609084	0.382069	0.368504	0.472914	0.539551	0.34811	0.488279	0.284304	0.27598	0.242815	0.305689	0.465331	0.421602	0.0587412	-0.276914	0.190598	0.110719	0.340191
TCGA.04.1371.01	cluster3	-0.587359	-0.717003	-0.710599	-0.697424	-0.688484	-0.803988	-0.583119	-0.684775	-0.525286	-0.527918	-0.526785	-0.585344	-0.681816	-0.638196	-0.652224	-0.342936	-0.693729	-0.454318	-0.591271
TCGA.04.1536.01	cluster3	-0.178327	-0.637905	-0.321587	-0.14566	-0.19833	-0.315065	-0.442285	-0.226368	-0.307974	-0.383611	-0.546978	-0.328037	-0.376956	-0.397662	-0.268193	-0.256128	-0.0989401	-0.136044	-0.267871
TCGA.29.1775.01	cluster3	-0.362737	-0.32687	-0.230334	-0.12199	-0.413666	-0.458081	-0.125237	-0.185368	-0.201358	-0.342185	-0.188139	-0.233246	-0.301963	-0.334417	-0.505287	0.166736	-0.404469	-0.349947	-0.346752
TCGA.61.2017.01	cluster3	-0.163597	0.180862	-0.195545	-0.0616895	-0.35761	-0.460407	0.106308	0.270395	0.0117755	0.0255298	-0.0212656	-0.0336023	-0.335565	-0.359852	-0.0242105	-0.000914305	-0.158684	-0.00980479	-0.139081
TCGA.24.1614.01	cluster3	-0.375597	-0.0286347	-0.444482	-0.386805	-0.420427	-0.500185	-0.316357	-0.407192	-0.231823	-0.215627	-0.242577	-0.168834	-0.470753	-0.42133	-0.534935	0.179391	-0.424961	-0.403687	-0.341577
TCGA.61.1725.01	cluster3	0.0740824	0.395016	0.129691	0.219488	0.166683	0.298157	0.277172	0.575707	-0.010021	0.0860708	0.215631	-0.0940932	0.0716966	0.194709	0.544705	0.612339	0.198826	0.193894	0.183559
TCGA.09.2056.01	cluster3	0.461217	0.356158	0.372312	0.322862	0.237482	0.348236	0.462946	0.625643	0.285446	0.299764	0.436526	0.126965	0.271919	0.379029	-0.213676	-0.0686938	0.489798	0.65661	0.331875
TCGA.59.2355.01	cluster3	0.13259	0.457845	-0.138294	0.0380287	-0.151591	-0.247971	0.401035	-0.166833	0.0360662	0.321131	0.443608	0.183049	-0.134248	-0.18355	0.160192	0.163009	-0.119524	0.0396327	0.0161862
TCGA.61.2110.01	cluster3	-0.341648	-0.569851	-0.424512	-0.248535	-0.383639	-0.561577	-0.477576	-0.305516	-0.31813	-0.33595	-0.466882	-0.346663	-0.436571	-0.419325	-0.72181	0.0787563	-0.191217	-0.620532	-0.391166
TCGA.04.1649.01	cluster3	-0.0727024	-0.402426	-0.318226	-0.44269	-0.255528	-0.53827	-0.352015	-0.413617	-0.23578	-0.142101	-0.277063	-0.0547937	-0.272233	-0.497318	-0.431169	-0.213617	0.0016174	-0.132893	-0.22561
TCGA.24.0966.01	cluster3	-0.436493	-0.411502	-0.31225	-0.457624	-0.387658	-0.499324	-0.394082	-0.468149	-0.386077	-0.370792	-0.372444	-0.473879	-0.399739	-0.364098	-0.0180322	-0.58765	-0.387696	-0.418781	-0.391432
TCGA.42.2589.01	cluster3	0.223643	0.129716	-0.0180799	-0.00286185	-0.103548	0.172414	-0.128199	-0.12519	-0.132723	-0.146989	-0.178973	0.121968	-0.202403	-0.0884167	0.0345463	-0.528222	-0.428682	0.479464	-0.137077
TCGA.20.0996.01	cluster3	-0.396274	-0.0216885	-0.297355	-0.383714	-0.35476	-0.580018	-0.0905147	-0.362784	-0.206946	-0.208348	-0.16109	-0.223059	-0.405995	-0.183189	-0.384385	0.0696534	-0.337251	-0.149786	-0.2955
TCGA.61.2092.01	cluster3	-0.214301	-0.517177	-0.504755	-0.626184	-0.559607	-0.773494	-0.603184	-0.560716	-0.340707	-0.527896	-0.472937	-0.403019	-0.569222	-0.60271	-0.527545	-0.438757	-0.586689	-0.397213	-0.49602
TCGA.61.2018.01	cluster3	0.032282	0.111982	-0.131227	0.257145	-0.16742	-0.26848	0.292728	0.228264	0.152729	0.00333946	-0.0163308	0.101179	-0.231205	-0.000698654	-0.15477	0.299283	-0.148726	-0.245787	-0.0678443
TCGA.29.1771.01	cluster3	0.216558	-0.074705	-0.164678	0.100682	-0.193092	-0.376708	0.016988	0.345549	-0.139932	-0.0729865	0.0427863	-0.225579	-0.238248	-0.132019	-0.598371	-0.530173	0.102783	0.231564	-0.00393581
TCGA.23.1021.01	cluster3	-0.34151	-0.504986	-0.522154	-0.507083	-0.402474	-0.50972	-0.347643	-0.511394	-0.360194	-0.359691	-0.379985	-0.313856	-0.512385	-0.5076	-0.539321	-0.165505	-0.342937	-0.116097	-0.403013
TCGA.13.0724.01	cluster3	-0.315298	-0.21186	-0.374261	-0.621446	-0.21104	-0.373168	-0.337103	-0.400678	-0.213998	-0.276981	-0.327762	-0.220384	-0.220323	-0.261653	-0.413507	0.237922	-0.277857	-0.415173	-0.307439
TCGA.23.2077.01	cluster3	0.243781	-0.451138	0.324864	0.318313	0.458819	0.357467	-0.128557	0.363204	-0.034941	-0.113315	-0.330283	-0.264776	0.394944	0.338061	0.0078943	-0.274095	0.434217	-0.436871	0.222684
TCGA.25.1870.01	cluster3	-0.0470047	-0.413407	-0.0422657	0.392433	0.188885	0.118784	-0.293401	0.15408	-0.312625	-0.359199	-0.421771	-0.469133	0.149209	0.155061	0.102917	-0.606733	0.307586	-0.489245	-0.138902
TCGA.25.1325.01	cluster3	-0.287364	-0.517592	-0.0699208	-0.388615	0.0330073	0.0411112	-0.253197	-0.494286	-0.277487	-0.22705	-0.330567	-0.152867	-0.00394393	0.0216211	0.169948	0.123608	-0.25627	0.0462051	-0.235245
TCGA.24.1845.01	cluster3	-0.0119683	-0.204347	0.123889	0.0617415	0.117718	-0.014096	-0.344274	0.222808	-0.19035	-0.27006	-0.235962	-0.109575	0.149297	0.0553375	0.00171526	-0.465246	0.326678	-0.487308	0.000342084
TCGA.29.2431.01	cluster3	-0.393374	-0.735221	-0.299274	-0.548023	-0.246417	-0.101105	-0.477483	-0.479872	-0.457492	-0.489108	-0.536278	-0.445499	-0.256512	-0.300775	-0.185752	-0.586606	-0.447219	-0.629358	-0.397881
TCGA.61.1918.01	cluster3	0.310035	-0.154494	0.189848	0.583816	0.209314	0.0419609	-0.263892	0.32607	-0.0783712	-0.00138592	-0.0831622	-0.166344	0.0265847	0.306828	-0.417185	-0.260635	0.422297	0.38017	0.197208
TCGA.10.0927.01	cluster3	-0.599346	-0.549144	-0.584448	-0.696169	-0.610153	-0.832009	-0.539961	-0.666431	-0.57882	-0.586653	-0.563386	-0.570713	-0.62784	-0.742093	-0.277333	0.422327	-0.618403	-0.458965	-0.574059
TCGA.24.1560.01	cluster3	-0.420562	-0.462681	-0.463736	-0.38739	-0.447595	-0.657996	-0.512804	-0.411766	-0.457176	-0.513921	-0.5639	-0.477354	-0.479048	-0.373092	-0.62316	-0.20349	-0.533381	-0.33921	-0.492749
TCGA.25.1871.01	cluster3	-0.585085	-0.433471	-0.653154	-0.669371	-0.630446	-0.602535	-0.523194	-0.549795	-0.531975	-0.539783	-0.620022	-0.512713	-0.622345	-0.577835	-0.33455	-0.45247	-0.56297	-0.636473	-0.577629
TCGA.25.1326.01	cluster3	0.424331	0.172024	0.492718	0.573343	0.62328	0.659909	0.363574	0.573118	0.344438	0.342028	0.261097	0.362453	0.616039	0.644728	0.142529	0.676227	0.553206	0.449381	0.456218
TCGA.23.2084.01	cluster3	0.276551	-0.333696	0.0496528	0.289787	0.396071	0.352221	-0.396509	0.293816	-0.0686199	-0.129711	-0.0316527	-0.337972	0.332945	0.361974	0.454355	0.197373	0.454005	0.248659	0.163439
TCGA.04.1364.01	cluster4	-0.664722	-0.81652	-0.771249	-0.821475	-0.775549	-0.904309	-0.725876	-0.780435	-0.771136	-0.718173	-0.672114	-0.792065	-0.723146	-0.779938	-0.644243	-0.681798	-0.705658	-0.602191	-0.700337
TCGA.24.0979.01	cluster4	-0.562772	-0.193051	-0.457015	-0.560947	-0.427792	-0.413242	-0.425236	-0.543786	-0.536013	-0.490787	-0.418558	-0.49223	-0.463703	-0.500266	-0.101138	-0.547686	-0.538738	-0.0497667	-0.443833
TCGA.61.2611.02	cluster4	-0.543347	-0.666881	-0.614646	-0.572969	-0.516856	-0.537544	-0.714942	-0.696848	-0.572478	-0.626698	-0.580582	-0.546866	-0.510858	-0.539323	-0.00759095	-0.485523	-0.666143	-0.031333	-0.563097
TCGA.36.2532.01	cluster4	-0.671806	-0.730098	-0.713073	-0.809915	-0.619068	-0.751143	-0.745661	-0.733761	-0.656086	-0.686547	-0.744369	-0.788632	-0.718758	-0.742612	0.181783	-0.661767	-0.698395	-0.742546	-0.663981
TCGA.24.1423.01	cluster4	-0.310057	-0.396448	-0.225487	-0.291053	-0.079617	0.10745	-0.210429	-0.491222	-0.41193	-0.448964	-0.49243	-0.436386	-0.120009	-0.167402	0.416505	-0.131243	-0.510858	0.0706941	-0.257547
TCGA.09.1674.01	cluster4	-0.618108	-0.794665	-0.663928	-0.62068	-0.671602	-0.626649	-0.728026	-0.679382	-0.637056	-0.677948	-0.692847	-0.78683	-0.678378	-0.689115	-0.440876	-0.396309	-0.669166	-0.623369	-0.636512
TCGA.61.2612.01	cluster4	-0.0550105	-0.675954	-0.26259	-0.173056	0.0272277	-0.129183	-0.569813	0.205579	-0.451024	-0.425856	-0.499452	-0.410551	-0.29724	-0.0522508	-0.0634621	-0.563618	0.136412	-0.226343	-0.211888
TCGA.04.1341.01	cluster4	-0.580205	-0.592519	-0.644092	-0.644948	-0.452283	-0.712505	-0.451781	-0.703051	-0.587048	-0.536637	-0.516026	-0.567723	-0.437323	-0.590088	-0.716692	-0.0951462	-0.644897	-0.0745098	-0.52356
TCGA.13.1511.01	cluster4	-0.0642536	-0.395827	-0.24622	0.0779932	-0.0027216	0.107356	-0.464053	0.0467281	-0.4637	-0.412531	-0.431846	-0.449992	0.0439112	0.00480087	0.426622	0.224897	-0.270485	0.482207	-0.167829
TCGA.29.1694.01	cluster4	0.0495857	-0.194947	0.187058	0.0170436	0.249661	-0.0661296	-0.221075	0.24673	-0.134557	-0.107772	-0.113494	-0.264952	0.0189843	-0.0263428	0.394274	0.463482	0.0915495	-0.119239	0.0824
TCGA.20.1683.01	cluster4	-0.274583	-0.246771	-0.426853	-0.324118	-0.353388	-0.0848102	-0.364824	-0.331966	-0.20036	-0.251148	-0.218985	-0.294968	-0.378153	-0.349813	-0.43621	-0.277385	-0.377036	0.56839	-0.307918
TCGA.04.1335.01	cluster4	-0.302077	-0.147748	-0.311011	-0.340646	-0.407821	-0.403451	-0.205751	-0.387097	-0.259129	-0.1943	-0.0398963	-0.112933	-0.399896	-0.346211	-0.169956	0.260909	-0.335011	0.00424489	-0.25759
TCGA.09.0369.01	cluster4	-0.612084	-0.638358	-0.44255	-0.557542	-0.465621	-0.561227	-0.662736	-0.576517	-0.59577	-0.574485	-0.563108	-0.685435	-0.501486	-0.383364	0.651967	0.343183	-0.495616	-0.637297	-0.513362
TCGA.09.2050.01	cluster4	-0.186622	-0.72237	-0.444468	-0.440823	-0.471362	-0.455326	-0.648705	-0.533756	-0.590349	-0.60274	-0.62499	-0.524721	-0.457748	-0.412559	-0.734719	-0.451329	-0.588569	-0.313634	-0.542882
TCGA.23.1118.01	cluster4	-0.360572	-0.368008	0.228025	0.0866242	0.359532	-0.345559	-0.343695	0.176946	-0.231442	-0.225258	-0.134119	-0.17316	0.31715	0.349505	0.220261	-0.445297	-0.00118416	0.480648	0.0656044
TCGA.25.1320.01	cluster4	0.300439	-0.578029	0.246387	0.49615	0.381052	0.559159	-0.0769036	0.408513	-0.294718	-0.201192	-0.249932	-0.344615	0.305388	0.453641	0.0107845	0.783599	0.272304	0.401123	0.157935
TCGA.04.1517.01	cluster4	-0.448514	-0.750042	-0.562173	-0.576833	-0.425479	-0.143238	-0.619667	-0.490471	-0.50328	-0.573215	-0.679087	-0.648217	-0.460149	-0.481889	-0.492572	-0.0839862	-0.272275	-0.171795	-0.474713
TCGA.25.1632.01	cluster4	-0.679059	-0.695487	-0.564068	-0.706278	-0.576282	-0.62851	-0.566788	-0.589142	-0.608575	-0.555426	-0.606589	-0.575904	-0.596333	-0.629352	-0.528689	-0.456797	-0.60794	-0.38999	-0.574447
TCGA.24.1544.01	cluster4	-0.679402	-0.561293	-0.65494	-0.694488	-0.664801	-0.66834	-0.554025	-0.721137	-0.543148	-0.566468	-0.590336	-0.591291	-0.693912	-0.658287	-0.705829	-0.393309	-0.715062	-0.570348	-0.622311
TCGA.24.1852.01	cluster4	-0.674005	-0.797906	-0.687782	-0.784483	-0.585762	-0.813397	-0.742228	-0.771139	-0.658814	-0.690722	-0.735118	-0.697663	-0.654462	-0.72791	0.362896	-0.655519	-0.673022	-0.827577	-0.657824
TCGA.24.2297.01	cluster4	-0.626922	-0.615184	-0.644885	-0.623536	-0.539504	-0.64473	-0.560964	-0.727723	-0.563326	-0.58737	-0.569914	-0.607036	-0.495993	-0.52409	0.364855	-0.355712	-0.632852	0.00581052	-0.542229
TCGA.23.1809.01	cluster4	-0.420607	-0.423618	-0.40215	-0.484343	-0.39299	-0.323384	-0.543396	-0.37116	-0.444935	-0.53055	-0.412205	-0.566349	-0.340692	-0.390009	-0.300797	-0.191795	-0.475301	-0.586081	-0.43393
TCGA.29.1702.01	cluster4	-0.652022	-0.793668	-0.628577	-0.606621	-0.547492	-0.703569	-0.711975	-0.550872	-0.690122	-0.675315	-0.5879	-0.705593	-0.611986	-0.605603	-0.25126	-0.162411	-0.542209	-0.651375	-0.61368
TCGA.24.1603.01	cluster4	-0.289857	-0.741316	-0.573282	-0.331769	-0.381307	-0.148246	-0.571584	-0.323628	-0.518252	-0.55325	-0.592429	-0.614062	-0.375209	-0.365458	-0.0734393	-0.692497	-0.533367	-0.301002	-0.45952
TCGA.23.1111.01	cluster4	-0.521135	-0.565407	-0.610477	-0.642776	-0.648453	-0.78064	-0.44524	-0.614113	-0.546025	-0.416393	-0.331216	-0.544988	-0.604098	-0.695261	-0.338015	-0.0518859	-0.583949	-0.335295	-0.508436
TCGA.36.2534.01	cluster4	-0.531731	-0.0519964	-0.476767	-0.521478	-0.411297	-0.557058	-0.409703	-0.438739	-0.466215	-0.496647	-0.437029	-0.443055	-0.551347	-0.534576	-0.109904	0.223338	-0.455699	-0.0795599	-0.429129
TCGA.29.1762.01	cluster4	-0.494422	-0.778223	-0.345046	-0.122797	-0.340844	-0.64981	-0.685983	-0.108471	-0.608201	-0.600137	-0.577335	-0.660994	-0.379237	-0.280988	0.0157055	-0.183985	-0.145378	-0.578105	-0.46761
TCGA.57.1992.01	cluster4	-0.30991	-0.803909	-0.549196	-0.367665	-0.484687	-0.575423	-0.642332	-0.462169	-0.605643	-0.637905	-0.695512	-0.705035	-0.453461	-0.432873	0.166066	-0.0640239	-0.445776	-0.410654	-0.492023
TCGA.24.1616.01	cluster4	-0.43778	-0.624324	-0.600596	-0.410045	-0.51889	-0.532619	-0.429496	-0.451952	-0.540857	-0.482586	-0.490153	-0.47068	-0.510757	-0.575498	-0.409485	-0.547944	-0.580475	-0.0649813	-0.493749
TCGA.24.1844.01	cluster4	-0.72431	-0.632292	-0.624669	-0.647762	-0.540695	-0.562454	-0.534117	-0.545584	-0.644091	-0.672841	-0.622958	-0.728326	-0.58213	-0.526559	-0.263264	-0.419842	-0.569774	-0.61596	-0.576383
TCGA.24.1469.01	cluster4	-0.37596	-0.343317	-0.205001	-0.342322	-0.257413	-0.253824	-0.211724	-0.236523	-0.309036	-0.356617	-0.277803	-0.326872	-0.176724	-0.299556	-0.715002	-0.678175	-0.425382	0.0645176	-0.279133
TCGA.24.1557.01	cluster4	-0.542754	-0.784845	-0.440618	-0.210483	-0.183806	0.0644768	-0.640666	-0.27306	-0.605461	-0.614753	-0.6261	-0.686844	-0.326209	-0.278382	-0.254686	-0.513203	-0.306278	-0.346754	-0.427962
TCGA.13.1477.01	cluster4	-0.616112	-0.63745	-0.61757	-0.62121	-0.602232	-0.788516	-0.610173	-0.65031	-0.615677	-0.598991	-0.619383	-0.668336	-0.604859	-0.671846	-0.578935	0.401023	-0.585747	-0.555591	-0.579363
TCGA.61.1899.01	cluster4	-0.110999	-0.512133	-0.261318	-0.0789479	-0.135273	-0.330928	-0.503851	-0.0631208	-0.414252	-0.45037	-0.413346	-0.394589	-0.28658	-0.188527	0.259284	-0.286325	0.0856667	-0.556915	-0.306295
TCGA.23.2643.01	cluster4	-0.629537	-0.684813	-0.638046	-0.575169	-0.546654	-0.731856	-0.65137	-0.602315	-0.593042	-0.598501	-0.633099	-0.669667	-0.575706	-0.705092	-0.322327	-0.0602287	-0.613345	-0.221057	-0.541596
TCGA.61.2102.01	cluster4	-0.352347	-0.531703	-0.152925	-0.197775	-0.0795999	0.0111348	-0.470296	0.148584	-0.422724	-0.479276	-0.356477	-0.437999	-0.20456	-0.136588	0.708595	0.531188	0.0587048	-0.316984	-0.243241
TCGA.24.2295.01	cluster4	-0.711445	-0.771561	-0.709632	-0.665351	-0.533082	-0.735292	-0.623289	-0.618801	-0.590567	-0.602715	-0.658722	-0.608496	-0.580087	-0.641947	-0.616445	-0.180449	-0.607841	-0.297049	-0.550495
TCGA.04.1342.01	cluster4	-0.47856	-0.106864	-0.345473	-0.538088	-0.395047	-0.54793	-0.258283	-0.548206	-0.302174	-0.347254	-0.249135	-0.394544	-0.367354	-0.435624	0.520618	0.334207	-0.468569	-0.37893	-0.36357
TCGA.61.1730.01	cluster4	-0.445594	-0.705354	-0.361562	-0.275451	-0.0978814	-0.555749	-0.639244	0.0349217	-0.507915	-0.510612	-0.582468	-0.45457	-0.387024	-0.189703	-0.460173	-0.123471	-0.0881439	-0.149376	-0.402447
TCGA.36.2548.01	cluster4	-0.269735	-0.628474	-0.186038	-0.0979381	0.325381	-0.201662	-0.609797	-0.0186352	-0.422923	-0.439897	-0.531109	-0.467348	0.207163	0.284732	-0.200281	-0.733792	-0.00411833	0.239362	-0.204643
TCGA.13.0802.01	cluster4	-0.647797	-0.713894	-0.690576	-0.718524	-0.60912	-0.602576	-0.710038	-0.593637	-0.662734	-0.671961	-0.660664	-0.720497	-0.664039	-0.590939	-0.359359	-0.52212	-0.658666	-0.394536	-0.631586
TCGA.24.1419.01	cluster4	-0.58987	-0.727856	-0.60817	-0.657337	-0.521925	-0.612493	-0.65177	-0.649584	-0.548187	-0.636071	-0.582869	-0.513679	-0.544477	-0.621858	-0.550996	-0.566517	-0.656237	-0.531909	-0.589041
TCGA.23.1113.01	cluster4	-0.635987	-0.652896	-0.680859	-0.577652	-0.526577	-0.656585	-0.604679	-0.505593	-0.62385	-0.551801	-0.601992	-0.684918	-0.570392	-0.560792	-0.646585	0.0158223	-0.415187	-0.346729	-0.555009
TCGA.13.0720.01	cluster4	-0.336472	-0.380172	-0.432892	-0.485146	-0.495815	-0.647288	-0.46597	-0.345592	-0.378113	-0.430801	-0.210114	-0.320666	-0.611623	-0.571435	-0.680904	-0.404474	-0.500476	-0.386975	-0.417859
TCGA.04.1331.01	cluster4	-0.318109	-0.630101	-0.422767	-0.369794	-0.456424	-0.380428	-0.638167	-0.498406	-0.446433	-0.478417	-0.600785	-0.362881	-0.453793	-0.472818	0.320682	0.255531	-0.461346	-0.348212	-0.4683
TCGA.25.1323.01	cluster4	-0.501554	-0.779129	-0.625642	-0.500083	-0.495082	-0.484126	-0.662101	-0.368129	-0.590195	-0.563338	-0.601427	-0.684868	-0.434137	-0.534304	-0.507981	0.235096	-0.503421	-0.351253	-0.520071
TCGA.29.2414.01	cluster4	-0.637286	-0.907013	-0.571788	-0.53311	-0.512	-0.704633	-0.607336	-0.521192	-0.636366	-0.570449	-0.643227	-0.650932	-0.608431	-0.570566	-0.553936	0.366187	-0.541159	-0.344794	-0.549572
TCGA.09.0364.01	cluster4	-0.563389	-0.589477	-0.698077	-0.654286	-0.650202	-0.74865	-0.644284	-0.73271	-0.660543	-0.673001	-0.62155	-0.699461	-0.694894	-0.645794	-0.52719	-0.254205	-0.701813	-0.637633	-0.650587
TCGA.24.1430.01	cluster4	-0.626384	-0.56324	-0.585456	-0.674252	-0.558865	-0.729529	-0.596475	-0.609422	-0.62507	-0.609038	-0.642308	-0.64627	-0.607407	-0.642542	0.133767	-0.00950044	-0.674118	-0.662043	-0.599915
TCGA.13.1506.01	cluster4	-0.216732	-0.455063	-0.425285	-0.428725	-0.410869	-0.434573	-0.367828	0.119636	-0.398899	-0.431245	-0.356828	-0.330585	-0.406996	-0.297821	-0.598842	-0.508795	-0.453767	0.282115	-0.371845
TCGA.24.1474.01	cluster4	0.0475805	-0.589247	0.193365	0.315114	0.248364	0.219863	-0.52946	0.451786	-0.312489	-0.330393	-0.520969	-0.48872	-0.0729227	0.292134	-0.250406	-0.728889	0.400476	-0.104265	-0.011252
TCGA.24.2036.01	cluster4	-0.556991	-0.726805	-0.592217	-0.527778	-0.5071	-0.676122	-0.695497	-0.555314	-0.587829	-0.618672	-0.614179	-0.541348	-0.594383	-0.611461	-0.310502	-0.516341	-0.571587	-0.580295	-0.560846
TCGA.09.1664.01	cluster4	-0.437701	-0.638286	-0.593646	-0.542812	-0.657198	-0.592356	-0.632657	-0.61424	-0.540843	-0.594987	-0.576665	-0.483704	-0.663008	-0.696368	-0.350813	-0.314087	-0.615555	-0.320184	-0.56699
TCGA.61.2088.01	cluster4	-0.37312	-0.832641	-0.47853	-0.397046	-0.322598	-0.608576	-0.662882	-0.455804	-0.52392	-0.550865	-0.582217	-0.601209	-0.455347	-0.47564	-0.458005	-0.595821	-0.270426	-0.414478	-0.440216
TCGA.61.1916.01	cluster4	-0.609859	-0.541359	-0.446199	-0.496328	-0.347889	-0.536267	-0.590497	-0.46701	-0.390296	-0.48337	-0.521361	-0.439453	-0.316189	-0.375995	-0.320891	-0.397474	-0.448259	-0.446969	-0.4357
TCGA.13.1409.01	cluster4	-0.636955	-0.569666	-0.697264	-0.761262	-0.636728	-0.705641	-0.560154	-0.642411	-0.543641	-0.568012	-0.630076	-0.72383	-0.657312	-0.702856	-0.687255	0.148982	-0.629279	-0.541469	-0.597007
TCGA.61.2613.01	cluster4	-0.619435	-0.85477	-0.626935	-0.500022	-0.510996	-0.59089	-0.634119	-0.476281	-0.632305	-0.599058	-0.620168	-0.615297	-0.574149	-0.571026	-0.482644	0.335267	-0.577417	-0.320582	-0.561125
TCGA.24.1558.01	cluster4	-0.283117	-0.765235	-0.361624	-0.45502	-0.461291	-0.159329	-0.582974	-0.583928	-0.598106	-0.593833	-0.592204	-0.56394	-0.45515	-0.403	-0.744391	-0.541353	-0.460523	-0.494149	-0.507124
TCGA.25.2400.01	cluster4	-0.227544	-0.559482	-0.415728	0.121217	-0.227982	-0.273896	-0.431646	-0.166196	-0.465372	-0.534301	-0.571775	-0.469094	-0.329408	-0.275629	-0.718725	-0.426049	-0.332434	-0.613153	-0.403745
TCGA.57.1584.01	cluster4	-0.0145262	-0.505854	-0.296562	-0.0169848	-0.0242691	-0.0316406	-0.319371	-0.167125	-0.334212	-0.268293	-0.295818	-0.430052	-0.0799837	0.108345	-0.124513	-0.268593	-0.039794	0.158409	-0.147356
TCGA.24.1548.01	cluster4	-0.129945	-0.584061	-0.349096	-0.240605	-0.291421	-0.347726	-0.443914	-0.216515	-0.447139	-0.491188	-0.485215	-0.446233	0.00204814	-0.213089	-0.745925	-0.483137	-0.419132	-0.222844	-0.367318
TCGA.24.1416.01	cluster4	0.00896828	-0.0510511	-0.287899	-0.0505318	-0.271741	0.0363489	-0.181426	-0.313372	-0.320878	-0.287433	-0.300381	-0.381946	-0.386655	-0.259706	-0.65269	-0.554423	-0.281226	0.010964	-0.255016
TCGA.36.2530.01	cluster5	-0.102363	-0.684775	0.123371	0.162042	0.21704	0.386938	-0.298892	0.0751124	-0.378779	-0.30593	-0.410582	-0.476252	0.220589	0.23398	0.334971	0.570817	0.039979	-0.304779	-0.106125
TCGA.13.0900.01	cluster5	-0.0134958	-0.010221	0.407292	0.407729	0.354227	0.1848	-0.158126	-0.0525506	0.148093	0.126625	0.159254	0.213748	0.358329	0.291026	0.458939	0.699	0.0541181	0.565419	0.217112
TCGA.61.2097.01	cluster5	0.432685	-0.68046	0.335525	0.718734	0.413583	0.518467	-0.382441	0.514143	-0.291705	-0.333939	-0.383411	-0.346499	0.422126	0.354829	0.391261	0.222792	0.544305	0.152913	0.233025
TCGA.13.2071.01	cluster5	0.384422	-0.68095	0.588802	0.707441	0.637754	0.585731	-0.333846	0.671956	-0.0188856	0.0140585	-0.197426	0.15314	0.566971	0.599691	0.390268	-0.386761	0.614199	0.467753	0.41179
TCGA.24.1550.01	cluster5	0.157236	0.252725	0.533026	0.608523	0.558273	0.634005	0.344885	0.502658	0.382019	0.309211	0.336568	0.157896	0.510573	0.561069	0.777904	0.582037	0.483919	0.368879	0.436349
TCGA.42.2591.01	cluster5	0.112512	0.551699	0.416614	0.382743	0.340809	0.277848	0.280003	0.491735	0.331825	0.369898	0.313889	0.394285	0.259334	0.470787	0.800734	0.504138	0.492348	0.418435	0.367038
TCGA.24.2262.01	cluster5	0.365289	0.502698	0.480608	0.380565	0.406003	0.536901	0.381393	0.439499	0.370785	0.377447	0.357536	0.36456	0.318708	0.459195	0.796887	0.604575	0.517119	0.291052	0.393
TCGA.25.1317.01	cluster5	-0.229223	-0.648089	-0.579814	-0.412767	-0.598205	-0.606706	-0.568884	-0.553011	-0.537535	-0.515026	-0.588771	-0.544156	-0.510318	-0.594187	-0.344004	0.336644	-0.542498	-0.10332	-0.514966
TCGA.23.2647.01	cluster5	-0.356597	-0.521117	-0.318435	-0.00267576	-0.195379	-0.0907354	-0.480289	-0.15937	-0.411609	-0.48482	-0.396336	-0.477527	-0.277192	-0.381375	0.255004	0.54771	-0.221318	-0.289145	-0.27759
TCGA.23.1122.01	cluster5	-0.215892	-0.589966	-0.30222	-0.254988	-0.0538241	-0.460477	-0.447761	-0.0594862	-0.452566	-0.426246	-0.540621	-0.546156	-0.151241	-0.188388	-0.280338	-0.416745	-0.17441	-0.150986	-0.270232
TCGA.59.2363.01	cluster5	-0.384104	-0.652394	-0.524152	-0.0492644	-0.4966	-0.646417	-0.53692	-0.316709	-0.585784	-0.574846	-0.619357	-0.517208	-0.49002	-0.606509	-0.148333	-0.304105	-0.474294	-0.391727	-0.508084
TCGA.24.2254.01	cluster5	-0.0408787	-0.767867	0.122238	0.46741	0.456733	0.144493	-0.436452	0.405223	-0.42215	-0.439284	-0.578651	-0.511543	0.128805	0.564167	0.393572	0.0968532	0.547615	-0.540446	-0.0708385
TCGA.61.1743.01	cluster5	-0.379519	-0.713339	-0.540489	-0.418789	-0.499822	-0.633153	-0.681317	-0.640016	-0.539014	-0.597934	-0.617844	-0.540388	-0.3947	-0.618253	-0.0909661	-0.46196	-0.573323	-0.396382	-0.516855
TCGA.13.0730.01	cluster5	0.0564049	0.165293	-0.155954	-0.392331	-0.352978	-0.115617	-0.303041	-0.0686299	-0.394764	-0.388494	-0.308551	-0.544363	-0.341391	-0.291044	0.472354	0.397619	-0.216355	-0.470417	-0.325402
TCGA.13.1501.01	cluster5	-0.48678	-0.666379	-0.437	-0.357267	-0.260834	-0.463535	-0.52187	-0.552337	-0.482235	-0.456299	-0.428768	-0.506291	-0.450556	-0.39485	0.248059	0.640604	-0.43772	0.390922	-0.36931
TCGA.61.2101.01	cluster5	-0.518084	-0.718262	-0.467179	-0.573944	-0.332313	-0.626494	-0.674647	-0.580269	-0.553338	-0.534103	-0.630381	-0.509729	-0.418506	-0.513155	-0.284897	0.405854	-0.501743	-0.206135	-0.483661
TCGA.13.1483.01	cluster5	-0.214094	-0.572175	0.0475618	0.044251	0.195827	0.215289	-0.37296	-0.226952	-0.365835	-0.347827	-0.490952	-0.356453	0.158477	0.116843	0.543598	0.452156	-0.24376	0.27681	-0.137735
TCGA.13.1408.01	cluster5	-0.329752	-0.205695	-0.145577	0.112458	-0.345833	-0.0917324	0.0863149	-0.347032	-0.104762	0.042041	-0.017929	0.0214677	-0.0223101	-0.159178	0.58384	0.711994	-0.240658	0.202869	-0.0793942
TCGA.09.1659.01	cluster5	0.00185691	-0.0452545	-0.121211	0.103244	-0.211469	-0.0392372	-0.0473426	-0.0915595	-0.259496	-0.248086	-0.23489	-0.419448	-0.275317	-0.28678	0.292453	0.320029	-0.0805913	0.109025	-0.214794
TCGA.30.1891.01	cluster5	0.155573	0.304505	0.240052	0.423675	0.260321	0.165517	0.212607	0.46778	0.25042	0.292401	0.193002	0.144432	0.130756	0.427047	0.347098	0.727983	0.357351	0.184448	0.239379
TCGA.10.0928.01	cluster5	-0.292205	-0.701512	-0.590143	-0.527171	-0.597692	-0.626907	-0.611481	-0.643785	-0.59987	-0.619141	-0.700698	-0.568665	-0.654345	-0.611082	0.0496348	-0.591975	-0.618687	-0.317261	-0.570834
TCGA.24.1546.01	cluster5	0.215941	-0.549667	0.303444	0.602754	0.438818	0.397793	-0.318248	0.522691	-0.251582	-0.172466	-0.262275	-0.334584	0.204246	0.52508	0.0352317	0.77745	0.482468	0.176218	0.237605
TCGA.61.1998.01	cluster5	0.0883689	-0.0550774	0.489042	0.558763	0.574876	0.207885	-0.196536	0.642773	-0.0842557	-0.0255253	0.0740907	-0.121249	0.42364	0.689836	0.660487	0.543882	0.544867	-0.217953	0.304152
TCGA.09.1661.01	cluster5	0.0664238	-0.247862	-0.200235	-0.123337	-0.291813	-0.382551	-0.282243	-0.398784	-0.130502	-0.264612	-0.296003	-0.178301	-0.260209	-0.256923	0.529836	0.334073	-0.212331	-0.383505	-0.22728
TCGA.13.0891.01	cluster5	-0.52858	-0.344998	-0.539435	-0.443143	-0.456909	-0.408352	-0.295293	-0.513563	-0.461481	-0.500724	-0.493065	-0.512405	-0.393047	-0.540387	-0.21012	-0.531982	-0.527876	-0.45172	-0.456161
TCGA.29.2434.01	cluster5	-0.151234	-0.442764	-0.27776	0.105937	-0.269992	-0.10473	-0.37942	0.319063	-0.371386	-0.459182	-0.468947	-0.385208	-0.351389	-0.222654	-0.206581	-0.505967	-0.077412	-0.437785	-0.314423
TCGA.29.1763.01	cluster5	-0.145462	-0.377199	-0.0266926	-0.146408	-0.251109	-0.194596	-0.193726	-0.0525638	-0.386191	-0.228026	-0.130537	-0.427751	-0.20795	-0.0256777	0.260999	-0.0395734	0.0476783	-0.24245	-0.218145
TCGA.30.1861.01	cluster5	-0.459055	-0.671597	-0.510291	-0.389165	-0.392872	0.0233108	-0.537885	-0.564762	-0.539512	-0.548723	-0.508483	-0.543322	-0.414572	-0.415743	-0.113262	0.751646	-0.406485	-0.263568	-0.461299
TCGA.23.1109.01	cluster5	-0.0378748	-0.233256	0.220879	-0.24712	0.00430299	0.296136	-0.346792	-0.332635	-0.0766062	-0.125477	-0.204807	-0.223228	0.0590606	0.299095	0.40419	0.358047	-0.034179	-0.584604	-0.112113
TCGA.24.2020.01	cluster5	-0.372134	-0.538553	-0.493313	-0.421784	-0.548442	-0.461317	-0.570806	-0.596872	-0.605336	-0.542128	-0.541591	-0.561286	-0.58295	-0.401433	0.228474	-0.344911	-0.523673	-0.342798	-0.521379
TCGA.42.2587.01	cluster5	-0.26182	-0.790095	-0.455243	-0.514961	-0.449587	-0.486446	-0.586498	-0.582318	-0.631471	-0.621979	-0.688945	-0.621016	-0.402764	-0.331911	-0.596401	-0.44538	-0.537912	-0.270401	-0.51982
TCGA.04.1651.01	cluster5	-0.0789458	-0.119329	-0.425503	-0.332083	-0.386455	-0.631792	-0.30423	-0.569849	-0.328902	-0.430543	-0.302325	-0.274907	-0.359709	-0.512696	-0.25043	-0.364081	-0.500578	0.142984	-0.365627
TCGA.23.1121.01	cluster5	-0.421025	-0.423284	-0.50949	-0.577348	-0.438949	-0.464836	-0.523644	-0.530413	-0.492662	-0.439913	-0.532117	-0.449643	-0.476085	-0.454323	-0.705056	-0.392146	-0.564892	0.00372493	-0.486754
TCGA.36.2537.01	cluster5	0.135305	0.112334	-0.0940775	0.188608	0.220435	0.237604	-0.0818431	0.233366	-0.265643	-0.10166	-0.159744	-0.342693	0.213119	0.217957	0.182603	0.452647	0.144188	0.32998	0.104677
TCGA.25.2404.01	cluster5	0.169768	-0.0966428	0.0214976	0.275495	0.227551	0.196374	-0.107062	0.291125	-0.264836	-0.210167	-0.231961	-0.398323	0.180106	0.131828	0.500414	0.601627	0.158691	0.142291	0.076945
TCGA.25.1627.01	cluster5	-0.248264	-0.615633	-0.467102	0.00741428	-0.398408	-0.413866	-0.58305	-0.377185	-0.492604	-0.52689	-0.562829	-0.557336	-0.504323	-0.34998	-0.633102	-0.159288	-0.387443	-0.181362	-0.419384
TCGA.13.0717.01	cluster5	-0.597139	-0.699019	-0.605804	-0.634562	-0.544465	-0.617772	-0.718071	-0.566036	-0.662653	-0.654646	-0.635089	-0.647164	-0.624039	-0.611615	-0.50782	-0.450846	-0.615347	-0.505732	-0.604138
TCGA.13.1482.01	cluster5	-0.160471	0.271873	-0.335625	0.0345028	-0.268811	-0.266051	0.265684	-0.170924	-0.159547	0.0671795	0.0732722	-0.111374	-0.363525	-0.441822	-0.121424	0.264147	-0.375452	0.296211	-0.205481
TCGA.61.2098.01	cluster5	-0.552007	-0.81069	-0.67176	-0.648615	-0.625733	-0.821081	-0.796513	-0.663531	-0.691344	-0.685555	-0.742708	-0.739174	-0.647296	-0.718338	-0.275058	-0.398503	-0.690682	-0.607533	-0.650179
TCGA.25.1631.01	cluster5	-0.459071	-0.655393	-0.493156	-0.354674	-0.420325	-0.53227	-0.600198	-0.387047	-0.519025	-0.569633	-0.557327	-0.584618	-0.512243	-0.53693	0.3635	-0.0209145	-0.43087	0.210546	-0.458213
TCGA.23.1114.01	cluster5	-0.595659	-0.704002	-0.535444	-0.606058	-0.559924	-0.699743	-0.670095	-0.644827	-0.670869	-0.698033	-0.684858	-0.707087	-0.595458	-0.675646	-0.100673	0.222515	-0.552746	-0.693307	-0.609597
TCGA.04.1332.01	cluster5	-0.170647	-0.634074	-0.258848	0.183821	-0.354047	-0.392616	-0.52509	-0.0951598	-0.402413	-0.203453	-0.446814	-0.555983	-0.433163	-0.260487	0.750612	0.702641	-0.100182	-0.0236025	-0.281842
TCGA.29.1770.01	cluster5	-0.543048	-0.457462	-0.365788	0.024117	-0.257137	-0.372703	-0.374301	-0.222537	-0.481306	-0.372987	-0.268701	-0.555607	-0.405614	-0.164536	0.733757	0.694004	-0.198139	-0.306968	-0.372304
TCGA.13.1485.01	cluster5	-0.369923	-0.804304	-0.333753	-0.199994	-0.231502	-0.355397	-0.649713	-0.319921	-0.552699	-0.551545	-0.664405	-0.639292	-0.343342	-0.138546	0.41428	0.793647	-0.326623	0.0474897	-0.369446
TCGA.13.1487.01	cluster5	-0.513625	-0.739405	-0.560977	-0.54193	-0.60307	-0.74916	-0.626101	-0.644759	-0.6335	-0.620133	-0.67263	-0.66231	-0.653363	-0.650256	-0.308512	0.388632	-0.652225	-0.0407982	-0.567761
TCGA.25.1322.01	cluster5	0.113923	-0.517826	0.282422	0.462928	0.407044	0.279614	-0.402745	0.463898	-0.311933	-0.357155	-0.27487	-0.4813	0.419959	0.444323	0.341732	0.156298	0.387914	0.197447	0.141769
TCGA.36.2542.01	cluster6	-0.360696	0.0999502	-0.200513	-0.503939	-0.157976	0.0396344	-0.254544	-0.396499	-0.331287	-0.346148	-0.311892	-0.276	-0.170194	-0.330975	-0.141653	-0.468572	-0.417659	-0.228594	-0.372889
TCGA.04.1648.01	cluster6	0.305652	-0.0191125	-0.0991127	-0.104522	0.0627169	-0.17607	0.0325531	-0.146542	-0.0668756	-0.0670134	-0.164503	-0.19882	0.088146	-0.139155	-0.196859	-0.629542	0.126705	-0.0639485	-0.00265687
TCGA.13.1509.01	cluster6	-0.179564	-0.269942	-0.0859432	0.231925	-0.211163	-0.237536	-0.285047	-0.0374345	-0.157755	-0.163928	-0.157204	-0.101112	-0.197974	-0.180639	0.200471	0.562969	-0.144584	0.665247	-0.0673993
TCGA.09.2054.01	cluster6	-0.134529	-0.417166	-0.350987	-0.301664	-0.467302	-0.529586	-0.532422	-0.469136	-0.43007	-0.392288	-0.384507	-0.479997	-0.371276	-0.509982	0.652028	0.209542	-0.418147	-0.215674	-0.430532
TCGA.13.0757.01	cluster6	-0.523266	-0.0549277	-0.153963	-0.146377	-0.281943	-0.422492	-0.353128	0.13454	-0.326043	-0.322072	-0.207597	-0.289904	-0.292189	-0.346396	-0.598225	0.300912	-0.225107	-0.0974222	-0.295355
TCGA.25.1329.01	cluster6	-0.242582	-0.236736	-0.0743192	0.0574008	0.303875	0.541083	-0.189483	0.237218	-0.312504	-0.142641	-0.263052	-0.355899	0.0257762	0.470386	0.140531	0.542428	0.32677	0.206191	0.0455351
TCGA.61.1900.01	cluster6	-0.559081	-0.775719	-0.672411	-0.612424	-0.69832	-0.746272	-0.747118	-0.619066	-0.629622	-0.694166	-0.717879	-0.697862	-0.661317	-0.696835	-0.0556442	-0.460789	-0.619619	-0.525442	-0.635435
TCGA.25.2397.01	cluster6	-0.0724809	-0.496842	-0.202499	-0.257484	0.0657975	-0.143995	-0.375921	0.133648	-0.352446	-0.281418	-0.405702	-0.48372	-0.277599	-0.107651	-0.27177	-0.341123	0.189719	-0.226115	-0.176972
TCGA.23.1029.01	cluster6	-0.341724	-0.645449	-0.452204	-0.439897	-0.371921	-0.349836	-0.532787	-0.582552	-0.547782	-0.578911	-0.566121	-0.576198	-0.291145	-0.346709	-0.0120587	-0.347691	-0.56278	-0.458836	-0.436319
TCGA.30.1714.01	cluster6	-0.243586	-0.540827	-0.571908	-0.482769	-0.488687	-0.492782	-0.401895	-0.416324	-0.483235	-0.531939	-0.431249	-0.453394	-0.568044	-0.536898	-0.522291	-0.268341	-0.38861	-0.581078	-0.482093
TCGA.13.0794.01	cluster6	-0.632023	-0.578881	-0.513962	-0.755413	-0.476098	-0.772495	-0.611357	-0.477972	-0.495037	-0.545012	-0.465053	-0.5773	-0.487474	-0.592395	-0.201485	-0.544655	-0.547474	-0.663708	-0.530404
TCGA.36.2543.01	cluster6	0.152567	0.24384	0.138567	0.178527	0.0876806	0.0533444	0.102596	0.310803	-2.22e-05	-0.119765	0.149169	-0.226582	0.11223	0.189651	-0.466306	-0.198795	-0.058128	0.272369	0.0439695
TCGA.09.0367.01	cluster6	-0.0756257	-0.289245	-0.132292	-0.444995	-0.233091	-0.0948385	-0.175992	0.0431977	-0.189603	-0.206942	-0.137063	-0.292814	-0.234623	-0.204495	-0.565924	-0.545974	0.0261172	-0.0183083	-0.161445
TCGA.13.1407.01	cluster6	-0.566471	-0.548094	-0.598945	-0.733444	-0.703597	-0.744296	-0.545824	-0.561327	-0.506596	-0.517231	-0.52869	-0.404289	-0.644808	-0.678289	-0.560973	0.0309415	-0.580921	-0.733046	-0.554649
TCGA.13.1819.01	cluster6	0.0426769	-0.251157	-0.129646	-0.142667	-0.0768854	0.103947	-0.0472027	-0.0335076	-0.236022	-0.328611	-0.194397	-0.211095	-0.00409361	-0.171888	0.434323	-0.611154	-0.297854	0.561269	-0.145784
TCGA.24.1604.01	cluster6	0.198985	-0.548201	-0.116176	-0.170353	-0.322436	-0.282676	-6.61e-05	-0.11686	-0.208567	-0.121679	-0.231646	-0.105089	0.0390341	-0.24923	-0.561878	-0.360036	-0.180912	0.244038	-0.152243
TCGA.20.1686.01	cluster6	-0.0754657	-0.282509	-0.41068	-0.264516	-0.421035	-0.588242	-0.493664	-0.417759	-0.197224	-0.375457	-0.290798	-0.238609	-0.455996	-0.429823	0.741435	0.231085	-0.350893	0.102892	-0.294162
TCGA.09.0365.01	cluster6	-0.688218	-0.484228	-0.603606	-0.778199	-0.568639	-0.751099	-0.56957	-0.60191	-0.480025	-0.519566	-0.51317	-0.605604	-0.563338	-0.536398	-0.283771	-0.027595	-0.591826	-0.636117	-0.54484
TCGA.10.0931.01	cluster6	-0.201661	-0.259112	-0.430293	-0.00129168	-0.44896	-0.548209	-0.318821	-0.505374	-0.428096	-0.378128	-0.32868	-0.310213	-0.444374	-0.544841	-0.704563	-0.657163	-0.503798	-0.478772	-0.382082
TCGA.25.1625.01	cluster6	0.467921	-0.0760346	0.279657	0.605346	0.290207	0.412337	0.150115	0.627603	-0.131516	-0.0212602	-0.0123927	-0.366524	0.16606	0.303024	0.283953	0.409797	0.536866	0.336233	0.297641
TCGA.61.1721.01	cluster6	0.10954	0.44742	0.241421	0.163457	-0.092104	-0.36765	0.327578	0.423428	0.34541	0.282519	0.315246	0.320641	-0.0968366	0.217352	0.930859	0.776827	0.283171	-0.383001	0.194453
TCGA.23.2081.01	cluster6	-0.593865	-0.57877	-0.540815	-0.613496	-0.514372	-0.560723	-0.553122	-0.542209	-0.591167	-0.584234	-0.620122	-0.67816	-0.559477	-0.638305	0.457503	0.0875121	-0.624502	-0.442537	-0.534335
TCGA.42.2582.01	cluster6	-0.665651	-0.613154	-0.667028	-0.803928	-0.737891	-0.588438	-0.640315	-0.567439	-0.488463	-0.573162	-0.571471	-0.520316	-0.677978	-0.724607	0.0474342	0.270717	-0.655459	-0.66862	-0.615631
TCGA.61.1741.01	cluster6	-0.00780748	-0.40661	0.039709	-0.164527	-0.175575	-0.0216867	-0.298145	-0.289001	-0.0835605	-0.217826	-0.0941087	0.0435937	-0.0401315	-0.12422	-0.130381	-0.576046	-0.197098	0.189825	-0.143867
TCGA.04.1525.01	cluster6	-0.286915	-0.0252618	-0.398295	-0.393949	-0.328504	-0.27722	-0.143455	-0.525534	-0.260522	-0.302047	-0.119565	-0.360118	-0.363274	-0.501624	-0.0220445	-0.17858	-0.412289	-0.298378	-0.301286
TCGA.09.2049.01	cluster6	-0.608386	-0.391618	-0.648446	-0.682128	-0.736234	-0.848075	-0.549706	-0.578754	-0.547191	-0.555717	-0.522488	-0.540847	-0.712218	-0.744261	-0.210141	0.0324973	-0.681474	-0.627686	-0.615852
TCGA.13.0765.01	cluster6	-0.0261354	0.0355659	-0.013537	-0.256028	-0.0171947	0.07433	-0.113658	0.119773	-0.0984742	0.00682208	0.0793829	-0.124825	-0.227065	0.0899429	-0.497506	-0.434062	0.214438	-0.427369	-0.0777528
TCGA.13.1489.01	cluster6	-0.586831	-0.768086	-0.63624	-0.715299	-0.504914	-0.579304	-0.628006	-0.697647	-0.620855	-0.616727	-0.731344	-0.606801	-0.474205	-0.637424	-0.622497	-0.523094	-0.633962	-0.214204	-0.584464
TCGA.29.1703.01	cluster6	-0.327165	8.31e-05	-0.372997	-0.319574	-0.391147	-0.302478	-0.338841	-0.315857	-0.374262	-0.413301	-0.335546	-0.359818	-0.448979	-0.480976	-0.620225	-0.170192	-0.408421	-0.087601	-0.388947
TCGA.13.1403.01	cluster6	-0.323848	-0.478301	-0.460304	-0.499033	-0.395632	-0.593004	-0.453282	-0.490377	-0.368129	-0.32575	-0.356376	-0.346399	-0.312334	-0.504358	0.263083	-0.0120318	-0.47704	0.257922	-0.343229
TCGA.13.0766.01	cluster6	-0.280846	-0.388099	-0.305232	-0.312225	-0.417616	-0.606652	-0.468325	-0.322624	-0.48414	-0.436062	-0.329922	-0.368583	-0.367504	-0.506303	-0.298013	-0.312959	-0.401695	-0.166532	-0.396685
TCGA.25.1318.01	cluster6	0.180832	-0.58185	0.0570612	0.31279	0.244599	0.561509	-0.333555	0.490891	-0.0156223	-0.14611	-0.255343	0.241558	0.167898	0.42134	-0.454605	0.472828	0.388484	0.0313231	0.127205
TCGA.59.2350.01	cluster6	-0.363372	-0.608413	-0.202274	-0.131111	0.267414	-0.24181	-0.565794	-0.220855	-0.415113	-0.456198	-0.530311	-0.325084	0.177466	0.301876	-0.414656	-0.678069	-0.095325	-0.0024329	-0.236496
TCGA.57.1582.01	cluster6	-0.584463	-0.328755	-0.339049	-0.280596	-0.147192	0.0217132	-0.521305	-0.356069	-0.394038	-0.517568	-0.421056	-0.419902	-0.200191	-0.173218	-0.40338	0.241926	-0.449317	-0.148729	-0.381422
TCGA.61.1910.01	cluster6	-0.329761	-0.546129	-0.238731	-0.424259	-0.345188	-0.0202191	-0.528306	-0.357414	-0.47848	-0.531298	-0.499019	-0.499867	-0.26197	-0.353095	0.137623	-0.437861	-0.289189	-0.348516	-0.37661
TCGA.24.2024.01	cluster6	-0.419405	-0.516038	-0.317854	-0.286836	-0.278773	-0.506928	-0.396943	-0.282334	-0.493853	-0.454012	-0.488156	-0.594136	-0.278117	-0.371716	-0.278996	0.00113631	-0.428133	-0.247861	-0.360745
TCGA.04.1362.01	cluster6	-0.347802	-0.649576	-0.464545	-0.263186	-0.255698	-0.438031	-0.375525	-0.286643	-0.383905	-0.417376	-0.463064	-0.533084	-0.320549	-0.133135	-0.378749	-0.767178	0.00696004	0.0486875	-0.286478
TCGA.29.1697.01	cluster6	-0.476416	-0.654147	-0.573798	-0.664351	-0.563731	-0.689324	-0.60718	-0.57418	-0.617721	-0.608271	-0.604906	-0.584558	-0.516169	-0.513536	-0.460412	-0.699776	-0.651702	-0.623036	-0.591932
TCGA.25.1634.01	cluster6	-0.576611	-0.568596	-0.64977	-0.572121	-0.653481	-0.697455	-0.670051	-0.659679	-0.585997	-0.58696	-0.655491	-0.642946	-0.665296	-0.613376	-0.624568	-0.264733	-0.650966	-0.653795	-0.618765
TCGA.29.1693.01	cluster6	-0.2385	0.0466179	0.100652	-0.0406551	-0.0797662	0.313326	-0.108902	0.177137	-0.262653	-0.276803	-0.0783023	-0.309138	-0.0388065	0.162969	0.48212	0.340854	-0.154981	0.348399	-0.104708
TCGA.25.1315.01	cluster6	-0.690274	-0.773222	-0.691635	-0.683576	-0.625739	-0.72744	-0.713751	-0.659458	-0.652957	-0.671064	-0.694566	-0.678142	-0.641681	-0.607973	-0.681969	-0.392662	-0.646695	-0.511394	-0.645318
TCGA.24.1105.01	cluster6	0.08599	0.493328	-0.064029	-0.106917	0.0732512	0.467931	0.222681	0.0663311	0.222679	0.27973	0.365971	0.269282	0.0128673	0.0757129	-0.393756	0.163569	-0.173366	0.373243	0.0974346
TCGA.24.2033.01	cluster6	-0.328185	-0.737601	-0.432693	0.329395	-0.303663	-0.27573	-0.561838	-0.119937	-0.515624	-0.456372	-0.452098	-0.549608	-0.397217	-0.284295	0.0411346	0.531311	-0.0930157	-0.221489	-0.381622
TCGA.29.2429.01	cluster6	-0.400964	-0.643084	-0.469885	-0.507097	-0.397351	-0.684358	-0.618222	-0.22814	-0.548702	-0.546186	-0.581112	-0.599141	-0.396332	-0.556138	-0.760114	-0.137707	-0.58008	-0.10342	-0.462362
TCGA.36.2533.01	cluster6	-0.361469	-0.615922	-0.452174	-0.0518304	-0.244585	-0.442133	-0.54601	-0.292087	-0.562437	-0.569088	-0.607079	-0.622309	-0.414198	-0.216647	-0.647929	-0.600992	-0.366561	-0.608619	-0.440699
TCGA.24.1467.01	cluster6	-0.401507	-0.13894	-0.245068	-0.535204	0.0416232	-0.257094	-0.378977	-0.288045	-0.279643	-0.346831	-0.364198	-0.327086	-0.0991942	-0.0695326	-0.599628	-0.239562	-0.391873	-0.548533	-0.303657
TCGA.23.1110.01	cluster6	-0.673785	-0.629992	-0.60828	-0.718109	-0.693754	-0.746988	-0.578837	-0.661759	-0.578945	-0.586999	-0.619701	-0.540901	-0.657285	-0.714872	-0.257697	-0.168138	-0.641476	-0.627683	-0.629107
TCGA.13.0751.01	cluster6	-0.265439	-0.376562	-0.430132	-0.565066	-0.471371	-0.347759	-0.5021	-0.434344	-0.386606	-0.477835	-0.42968	-0.343996	-0.515226	-0.471826	-0.245215	-0.542369	-0.374623	-0.28757	-0.403316
TCGA.13.0887.01	cluster6	-0.0116052	-0.63662	-0.277139	-0.144135	-0.172656	-0.44162	-0.528091	-0.41145	-0.436704	-0.481882	-0.541531	-0.365265	0.0202962	-0.316866	0.0698022	-0.16557	-0.367694	-0.29799	-0.335479
TCGA.09.1673.01	cluster6	-0.444787	-0.392376	-0.271476	-0.251762	-0.110471	-0.378051	-0.423417	-0.039431	-0.373965	-0.350667	-0.384444	-0.530599	-0.280438	-0.23369	0.556165	-0.766761	-0.0980936	-0.338685	-0.279683
TCGA.13.1491.01	cluster6	-0.511968	-0.727688	-0.592488	-0.504483	-0.577135	-0.572519	-0.589395	-0.514131	-0.595966	-0.549785	-0.681911	-0.560604	-0.507682	-0.562293	-0.839739	-0.265507	-0.642157	-0.535346	-0.577527
TCGA.24.1103.01	cluster6	-0.561295	-0.428984	-0.577009	-0.551148	-0.437342	-0.597227	-0.500083	-0.648362	-0.531237	-0.546234	-0.469673	-0.582913	-0.545466	-0.612362	0.0819504	-0.379322	-0.652964	-0.0840895	-0.507407
TCGA.04.1542.01	cluster6	-0.552372	-0.776627	-0.662981	-0.702418	-0.610075	-0.824971	-0.6549	-0.647563	-0.571565	-0.59723	-0.593183	-0.582553	-0.606965	-0.699511	-0.568121	-0.488	-0.641991	-0.444932	-0.570441
TCGA.23.1107.01	cluster6	-0.512066	-0.505069	-0.462129	-0.464937	-0.292803	-0.652012	-0.435288	-0.524804	-0.499092	-0.386924	-0.408618	-0.436298	-0.397751	-0.484696	-0.279001	-0.638108	-0.516021	0.403012	-0.431099
TCGA.57.1583.01	cluster6	-0.596215	-0.522145	-0.610241	-0.599256	-0.544584	-0.545987	-0.4648	-0.532654	-0.507135	-0.513652	-0.505063	-0.499551	-0.488884	-0.579614	-0.108775	0.185187	-0.578574	-0.537762	-0.535164
TCGA.10.0938.01	cluster6	-0.659781	-0.599446	-0.691197	-0.623444	-0.651423	-0.706365	-0.56818	-0.680086	-0.560124	-0.571256	-0.533857	-0.49887	-0.572371	-0.684962	-0.635097	-0.679412	-0.662181	-0.43855	-0.589568
TCGA.36.1571.01	cluster6	-0.609319	-0.627121	-0.585329	-0.750291	-0.631942	-0.680338	-0.689903	-0.67647	-0.608055	-0.644338	-0.610421	-0.716149	-0.526104	-0.604538	-0.507794	-0.466834	-0.669159	-0.232008	-0.598967
TCGA.24.2027.01	cluster6	-0.497538	-0.741136	-0.577213	-0.673877	-0.575592	-0.573876	-0.702918	-0.662063	-0.499288	-0.559099	-0.60352	-0.427249	-0.500279	-0.459822	-0.397603	-0.367308	-0.638793	-0.616317	-0.542382
TCGA.61.1724.01	cluster6	-0.27175	0.19046	-0.176056	-0.192107	0.0404095	0.0439231	-0.221518	-0.140338	0.0146247	-0.16447	0.0844728	0.0125921	0.0790639	0.00560923	0.0853803	-0.0236907	-0.178788	0.207383	-0.0999636
TCGA.31.1946.01	cluster7	0.362524	0.484955	0.590439	0.68665	0.649238	0.834067	0.42728	0.53439	0.441653	0.40528	0.481422	0.524796	0.608129	0.709141	0.667508	0.629981	0.49008	0.705172	0.511645
TCGA.04.1360.01	cluster7	-0.408185	0.0855908	-0.282113	-0.366806	-0.362666	-0.107437	-0.180651	-0.284813	-0.126461	-0.257085	-0.365962	0.0724433	-0.236334	-0.152886	0.199273	0.104026	-0.35174	-0.0154518	-0.281742
TCGA.31.1959.01	cluster7	0.628047	0.51379	0.601813	0.705147	0.606514	0.543027	0.43843	0.676373	0.560805	0.537134	0.531299	0.514676	0.579809	0.655918	0.653389	0.748912	0.600561	0.330661	0.549287
TCGA.13.2066.01	cluster7	0.414186	-0.42446	0.470309	0.692374	0.585539	0.822114	0.230098	0.558494	0.261787	0.349163	0.0675094	0.105248	0.505331	0.522732	0.540256	0.59803	0.610142	0.431924	0.435002
TCGA.36.1568.01	cluster7	0.462744	0.227689	0.208365	-0.0660126	0.0991552	0.641562	0.359058	-0.0121516	0.256235	0.270316	0.109264	0.301763	0.234155	0.209634	-0.372995	0.080777	0.202232	0.323401	0.242889
TCGA.61.2000.01	cluster7	0.0656355	0.551154	0.0454654	0.486364	0.196521	-0.0392967	0.283964	0.242402	0.0849368	0.0490136	0.242286	0.193673	0.103375	0.149367	0.0296034	-0.223173	0.0295567	0.114202	0.0709814
TCGA.24.2289.01	cluster7	0.526686	-0.459002	0.481609	0.665639	0.608621	0.738828	0.303471	0.552147	0.300602	0.371236	0.121276	0.02746	0.605419	0.453423	0.565462	0.471787	0.583862	0.465733	0.447866
TCGA.04.1530.01	cluster7	0.337116	0.366077	0.464209	0.355339	0.483604	-0.118458	0.454747	0.43848	0.338083	0.401239	0.494671	0.449561	0.502983	0.500522	-0.0672816	0.585917	0.449758	0.38112	0.397402
TCGA.04.1356.01	cluster7	-0.117119	-0.331118	-0.33167	-0.270008	-0.243549	-0.000768248	-0.305228	-0.245523	-0.200111	-0.173053	-0.286506	-0.0383177	-0.142435	-0.336954	-0.0248581	0.218178	-0.284339	-0.112242	-0.246032
TCGA.36.1574.01	cluster7	-0.195893	0.0616255	0.253996	0.126102	0.161081	0.558844	-0.103581	0.175131	0.13819	-0.163417	0.0857079	0.0567749	0.22628	0.153972	0.334627	0.588554	-0.215011	0.37881	0.123455
TCGA.36.2545.01	cluster7	-0.102482	0.649105	0.0128016	-0.196472	-0.329528	-0.043139	0.509248	0.250054	0.0646387	0.101894	0.298704	0.0889165	0.0652446	-0.245966	-0.737091	-0.65635	-0.303408	0.390179	-0.0796192
TCGA.30.1855.01	cluster7	0.503458	0.450058	0.488613	0.173256	0.429334	0.408167	0.495135	0.448422	0.440784	0.465732	0.495432	0.52362	0.543023	0.569541	0.163838	0.31742	0.514155	-0.0618894	0.44455
TCGA.13.1488.01	cluster7	-0.105095	0.501496	0.0272194	-0.300695	-0.124632	0.263976	0.280028	-0.523857	0.263939	0.125626	0.276803	0.1628	0.0392551	-0.292951	-0.450334	-0.0866186	-0.472211	0.287827	-0.0125346
TCGA.13.0919.01	cluster7	0.292761	-0.678906	0.398914	0.46252	0.590531	0.661912	-0.456249	0.304542	-0.116544	-0.130062	-0.270021	0.0151271	0.615942	0.614389	0.50023	0.680572	0.474678	0.511489	0.332713
TCGA.23.1023.01	cluster7	-0.0657311	0.202814	0.0789597	0.261374	-0.0254703	-0.00545517	0.0469002	0.406668	0.0546948	0.172837	0.0943377	0.161273	-0.131995	0.0555508	0.836748	0.55977	-0.0568941	0.548095	0.103288
TCGA.09.1666.01	cluster7	0.105696	0.02451	0.0552582	-0.029847	0.0899911	0.034028	0.222796	-0.309837	0.0238371	-0.0274363	0.165045	-0.157597	0.0465191	-0.0808974	-0.198273	-0.609933	-0.144273	0.00540226	0.0327951
TCGA.24.2030.01	cluster7	-0.510139	-0.225246	-0.346847	-0.593733	-0.0782816	-0.595698	-0.514949	-0.440593	-0.394419	-0.427821	-0.369957	-0.315323	-0.365671	-0.335481	0.0413894	-0.340728	-0.274115	-0.219553	-0.383386
TCGA.09.1669.01	cluster7	0.0617305	0.535566	-0.039649	-0.109561	-0.289353	0.00739841	0.421446	-0.320041	0.225973	0.224845	0.289108	0.328389	-0.114012	-0.299906	-0.224587	0.301778	-0.233051	0.0665069	0.0131178
TCGA.61.2614.01	cluster7	0.0979046	0.0620741	0.194394	0.359734	-0.0130035	0.134152	0.107474	-0.261847	0.0225989	0.00631387	0.0705289	0.0359161	0.276728	-0.10713	-0.320342	0.0265586	-0.162077	0.333609	0.059718
TCGA.10.0933.01	cluster7	-0.326233	-0.297903	-0.611147	-0.572698	-0.666456	-0.625012	-0.353077	-0.553213	-0.467292	-0.516328	-0.459522	-0.410385	-0.586523	-0.571803	0.400029	0.174022	-0.505258	-0.542301	-0.495337
TCGA.24.0975.01	cluster7	-0.0816632	0.565346	-0.0206955	-0.0120844	-0.0162616	-0.00955546	0.364623	-0.115125	0.0558487	0.299904	0.238707	0.0689823	0.0527747	-0.127662	0.637643	0.575123	-0.0290212	0.273172	0.090325
TCGA.29.1705.01	cluster7	0.155085	-0.548159	0.0171269	0.325572	0.320254	0.333148	-0.286747	0.0457865	-0.0362544	-0.104255	-0.182609	-0.122659	0.280775	0.250317	0.6458	0.525081	0.367057	-0.129315	0.135612
TCGA.24.1850.01	cluster7	0.148441	0.033987	0.229775	0.121523	0.404517	0.308828	-0.114162	0.223381	0.0480536	-0.0572779	0.00177919	0.157679	0.402082	0.32664	-0.295552	0.17824	0.161619	0.303451	0.152039
TCGA.24.2280.01	cluster7	0.0302703	-0.307037	0.179296	0.237306	-0.0996818	-0.464377	-0.364156	0.17381	-0.00811197	-0.0914663	-0.325364	-0.0398538	-0.0920903	-0.0926484	0.86506	0.765748	0.21078	-0.223262	-0.0810996
TCGA.36.1577.01	cluster7	-0.439387	-0.689712	-0.579657	-0.375838	-0.513209	-0.478806	-0.645005	-0.0855396	-0.593687	-0.58727	-0.646022	-0.5913	-0.574726	-0.477667	-0.301043	-0.0519567	-0.511402	-0.433645	-0.547977
TCGA.24.1463.01	cluster7	0.116237	-0.0140435	0.377207	0.19776	0.373176	0.549822	0.135159	0.396766	-0.148334	0.0165354	-0.251739	-0.268948	0.420697	0.426528	0.37447	0.439706	0.168311	0.390424	0.241492
TCGA.24.2298.01	cluster7	-0.291241	-0.320728	-0.258035	-0.0255921	-0.185594	0.0151226	-0.208448	-0.0109174	-0.293297	-0.28061	-0.1756	-0.321284	-0.175682	-0.343824	0.3038	0.677073	-0.201271	0.0133229	-0.193418
TCGA.25.2408.01	cluster7	0.145422	-0.0924698	0.35377	0.531077	0.395319	0.00180873	-0.0388995	0.557261	-0.10231	0.0763189	-0.0328129	-0.133086	0.254364	0.521781	0.315612	0.798188	0.493894	-0.253316	0.233919
TCGA.13.2059.01	cluster7	0.127568	-0.440183	0.104679	0.365894	-0.0153576	-0.655436	-0.474649	0.00705448	-0.171765	-0.0840288	-0.413077	-0.0112235	-0.0481632	-0.064595	0.834131	0.719339	0.116538	-0.20571	-0.101827
TCGA.25.2398.01	cluster7	-0.112816	-0.451765	0.279571	0.317094	0.269189	0.148417	-0.162157	0.0440401	-0.335734	-0.196674	-0.30568	-0.468312	0.292473	0.178728	0.297631	0.571487	0.204878	-0.189534	-0.0187066
TCGA.36.2538.01	cluster7	0.15421	-0.0175986	0.297811	0.505022	0.354624	0.0459291	0.0497763	0.553274	-0.0707913	0.0489177	-0.0851904	-0.287471	0.173572	0.510008	0.394747	0.806619	0.453627	-0.216857	0.20124
TCGA.24.1425.01	cluster7	0.482441	0.481576	0.539314	0.608187	0.468501	0.597673	0.359221	0.554708	0.484165	0.485153	0.402082	0.475414	0.408327	0.591283	0.936095	0.766416	0.564965	0.372417	0.493671
TCGA.13.1512.01	cluster7	-0.216542	0.0870294	0.171892	-0.162112	0.316945	0.37044	-0.037507	-0.146661	-0.212168	0.00908526	0.0107463	-0.0727466	0.345166	0.314455	0.0417982	0.428887	-0.0769811	0.563584	-0.0213693
TCGA.29.1698.01	cluster7	0.133888	-0.454793	-0.0342139	0.173574	-0.209632	-0.24208	-0.309039	-0.14569	-0.139788	-0.15288	-0.0747749	-0.00893365	-0.0331411	-0.387297	0.654459	0.561023	-0.305452	-0.050601	-0.172623
TCGA.24.2290.01	cluster7	0.47925	-0.66362	0.597862	0.647526	0.684049	0.63922	-0.238173	0.648276	0.0720891	0.0789016	-0.237363	0.356752	0.643203	0.593962	0.43853	-0.340692	0.675746	0.194033	0.449587
TCGA.61.1737.01	cluster7	0.296096	-0.325785	0.281231	0.349661	0.34669	0.346878	-0.0680246	0.259906	-0.280971	-0.203789	-0.29057	-0.0898886	0.276819	0.366802	0.566079	0.674651	0.10334	0.10866	0.130615
TCGA.57.1585.01	cluster7	0.335911	-0.00565066	0.412395	0.406238	0.245318	0.503429	0.133093	0.298793	0.311227	0.218394	0.0633499	0.242118	0.252433	0.251139	0.295804	0.807615	0.331693	0.141364	0.30631
TCGA.13.1481.01	cluster7	-0.0808808	0.0531631	-0.0773476	0.02958	-0.334658	-0.0534161	-0.0486823	-0.363677	0.118037	0.0802099	-0.11148	0.301299	-0.12753	-0.346394	0.321202	0.783518	-0.381557	0.62311	-0.11325
TCGA.13.1494.01	cluster7	-0.148065	-0.130214	0.0735941	0.0674096	0.0667624	0.165504	-0.069925	-0.130687	-0.124415	-0.152971	-0.2048	-0.124927	0.147742	-0.148112	0.730904	0.727216	-0.344221	0.260336	-0.0519788
TCGA.24.1435.01	cluster7	0.0618973	0.11185	0.335471	0.356866	0.442306	0.232598	0.261729	0.132035	-0.043052	0.184646	-0.110875	0.137454	0.464007	0.579523	0.4993	0.524251	0.0488484	0.533451	0.270262
TCGA.13.0890.01	cluster7	0.436329	0.0653149	0.419206	0.484782	0.457942	0.489777	0.148241	0.358567	0.261846	0.215598	0.272163	0.292178	0.447525	0.503569	0.565622	0.641062	0.272504	0.413151	0.360266
TCGA.24.1434.01	cluster7	0.300408	0.0683896	0.65264	0.59731	0.623777	0.683123	0.391741	0.616419	0.350732	0.43622	0.194727	0.196097	0.605928	0.736009	0.0263951	0.717646	0.720995	0.450466	0.529975
TCGA.04.1337.01	cluster7	0.00920675	0.439952	0.259649	-0.0829013	0.0513659	-0.222185	0.231131	-0.0556966	0.162224	0.353679	-0.0105787	-0.00123291	0.12691	0.177775	0.703846	0.521825	0.230315	0.0152751	0.179494
TCGA.13.0888.01	cluster7	-0.736406	-0.649244	-0.714336	-0.827771	-0.648564	-0.684433	-0.651404	-0.736801	-0.637674	-0.572993	-0.629685	-0.581446	-0.65574	-0.694699	-0.217465	-0.0571334	-0.680357	-0.67828	-0.6294
TCGA.13.1492.01	cluster7	-0.502308	-0.505538	-0.543523	-0.547252	-0.510878	-0.636643	-0.450249	-0.643566	-0.463516	-0.485328	-0.420174	-0.276739	-0.352434	-0.41517	-0.441036	-0.0910695	-0.595087	-0.556327	-0.514865
TCGA.13.1498.01	cluster8	0.414213	0.731178	0.433603	0.134573	0.231686	0.498099	0.60754	0.283384	0.505549	0.502169	0.531749	0.456431	0.41731	0.345702	-0.617206	-0.109228	0.0453807	0.327024	0.395918
TCGA.13.0793.01	cluster8	0.288451	0.638275	0.169578	0.259145	0.207192	-0.340968	0.53908	0.168673	0.390121	0.459179	0.507413	0.396279	0.204955	0.140867	0.562433	0.547013	0.328012	0.0630418	0.298942
TCGA.29.1692.01	cluster8	0.500477	0.426311	0.441483	0.591597	0.324728	0.363705	0.490125	0.244367	0.438639	0.416179	0.424787	0.27656	0.275967	0.217487	0.678636	0.44578	0.125584	0.474686	0.373144
TCGA.04.1652.01	cluster8	0.0250876	0.00756191	-0.16479	-0.356873	-0.320641	-0.179005	-0.0628224	-0.301008	0.0706874	0.0480899	-0.0271927	0.0774349	-0.244971	-0.172509	-0.0462024	0.271817	-0.017016	-0.112383	-0.0876139
TCGA.24.1562.01	cluster8	0.403333	0.224487	0.0411746	0.225994	-0.0890215	0.148859	0.525757	0.106664	0.224461	0.412552	0.417166	0.31232	-0.113616	0.162644	-0.248484	0.35618	0.187434	0.531946	0.239888
TCGA.25.1633.01	cluster8	0.169197	0.576182	0.451318	0.603233	0.217109	0.453493	0.529741	0.559579	0.505038	0.473555	0.491615	0.534912	0.288323	0.293035	0.461252	0.675796	0.376552	0.207172	0.406065
TCGA.23.1026.01	cluster8	0.347623	0.81213	0.441187	0.542052	0.462702	0.428124	0.664055	0.535194	0.492482	0.49721	0.601125	0.553228	0.445382	0.484565	0.57308	0.18231	0.379944	0.488203	0.466394
TCGA.13.1505.01	cluster8	-0.330119	-0.232072	-0.20427	-0.145048	-0.30119	-0.181607	-0.0783916	-0.221381	0.039774	4.92e-05	-0.141465	0.116248	-0.222182	-0.30812	-0.021571	0.709942	-0.346006	-0.0196588	-0.193015
TCGA.13.0805.01	cluster8	0.184547	0.494341	0.457489	0.183056	0.171828	-0.049975	0.430133	0.278477	0.265047	0.419266	0.454836	0.268902	0.132479	0.361686	0.176666	0.549869	0.357264	0.383535	0.327432
TCGA.61.2104.01	cluster8	0.598836	0.288882	0.557778	0.463934	0.499167	0.544025	0.353795	0.431284	0.474775	0.466617	0.384705	0.461644	0.579481	0.468634	-0.114931	-0.588081	0.527064	0.336359	0.520558
TCGA.13.1404.01	cluster8	-0.249287	-0.0611329	-0.116529	-0.0623203	-0.213515	-0.0124636	-0.0749225	-0.242933	0.0169858	-0.0246582	-0.0319229	0.288661	-0.129938	-0.0999806	0.467886	0.475366	-0.171359	0.0463227	-0.160449
TCGA.10.0926.01	cluster8	-0.493957	-0.465156	-0.503207	-0.448987	-0.492131	-0.438353	-0.53527	-0.350403	-0.553103	-0.497875	-0.518659	-0.44311	-0.550965	-0.571171	0.155761	0.174715	-0.444615	-0.0196319	-0.490319
TCGA.24.1556.01	cluster8	-0.00400551	0.300675	0.120954	0.0768712	-0.000458895	0.43631	0.447286	0.00106503	0.249372	0.234349	0.16108	0.22268	0.232745	0.0554954	0.103391	-0.509218	-0.187696	-0.34952	0.198096
TCGA.24.1551.01	cluster8	0.570738	0.699049	0.563693	0.576685	0.527972	0.511641	0.69006	0.66595	0.540342	0.59873	0.620382	0.566529	0.508513	0.540114	0.105331	-0.392823	0.659197	0.400383	0.566915
TCGA.13.0897.01	cluster8	0.213824	0.555292	0.295491	-0.0203691	0.381445	0.597983	0.379882	0.0589801	0.182447	0.215222	0.324898	0.258228	0.226498	0.361585	-0.224812	0.147715	-0.0689353	0.282755	0.270499
TCGA.25.2391.01	cluster8	0.193477	-0.0534319	0.0157084	0.264712	0.165848	-0.328557	0.0131298	0.511698	-0.127374	-0.0588558	-0.218949	0.278134	0.135171	-0.197096	-0.578717	-0.656509	0.171447	0.13508	0.0794364
TCGA.59.2352.01	cluster8	0.0756702	0.214808	0.195239	0.116535	0.0697484	0.24865	0.167238	-0.145329	0.0223081	-0.0153625	0.146198	0.092352	0.320863	-0.103452	-0.386165	-0.0992708	-0.095085	0.259155	0.0763211
TCGA.61.2109.01	cluster8	0.205806	-0.131982	-0.22759	0.185057	-0.0084363	-0.0834703	-0.236422	-0.289506	0.00704979	-0.222787	-0.275686	-0.227063	-0.226388	0.0865013	-0.675857	-0.479986	0.0565576	-0.341383	-0.0965304
TCGA.29.1688.01	cluster8	0.625585	0.57756	0.523051	0.624022	0.517946	0.649487	0.579464	0.588273	0.539831	0.549352	0.558335	0.553686	0.567551	0.599205	0.706399	0.338588	0.633021	0.351816	0.566033
TCGA.61.2009.01	cluster8	0.253221	0.373172	0.390828	0.330345	0.235536	0.299142	0.160169	0.319214	0.271316	0.180934	0.0868624	0.165087	0.334193	0.391124	0.46209	0.633904	0.329403	0.46134	0.281431
TCGA.13.1504.01	cluster8	0.39958	-0.509722	0.363181	0.442087	0.574994	0.457739	-0.120229	0.560813	-0.0253922	0.117803	-0.2756	-0.137974	0.469523	0.622475	0.652432	0.662415	0.610532	0.432719	0.39841
TCGA.24.1846.01	cluster8	0.423555	0.404022	0.391907	0.337921	0.225016	0.333575	0.362915	0.454108	0.285174	0.222734	0.265835	0.537369	0.325001	0.325522	-0.481666	0.181697	0.179001	0.282123	0.314986
TCGA.24.2260.01	cluster8	-0.21959	-0.441751	-0.287883	-0.290902	-0.27971	-0.17686	-0.366192	-0.51508	-0.125782	-0.208221	-0.0820799	-0.00613611	-0.329731	-0.35712	0.481944	0.0601779	-0.277077	-0.305301	-0.256179
TCGA.13.0899.01	cluster8	0.0364723	-0.465267	-0.273653	0.118058	-0.0361519	-0.0464944	-0.285729	-0.195737	-0.395319	-0.360173	-0.389334	-0.175871	-0.183419	-0.332798	-0.430366	-0.177015	0.00726963	-0.107737	-0.279362
TCGA.61.1895.01	cluster8	0.482005	0.605824	0.639566	0.700013	0.594097	0.57242	0.559679	0.746006	0.477819	0.485287	0.514997	0.494793	0.552832	0.684482	0.324064	0.0884382	0.603709	0.396053	0.533792
TCGA.13.0912.01	cluster8	-0.176664	-0.450645	-0.549472	-0.462174	-0.514069	-0.471081	-0.35762	-0.459795	-0.49036	-0.476993	-0.595998	-0.411435	-0.545511	-0.649572	-0.750813	-0.70535	-0.455418	-0.502854	-0.47139
TCGA.24.1422.01	cluster8	0.485612	0.830842	0.502183	0.588088	0.407219	0.556309	0.684679	0.465246	0.495333	0.577975	0.602028	0.361107	0.318527	0.59661	0.693359	0.610097	0.53813	0.483806	0.496691
TCGA.23.1028.01	cluster8	-0.30651	0.0148745	-0.370266	-0.483692	-0.463973	-0.666018	0.21707	-0.344676	0.0529869	-0.119061	0.0562981	0.188792	-0.37603	-0.583038	-0.404347	-0.387953	-0.530724	-0.287592	-0.258834
TCGA.24.0980.01	cluster8	0.540653	0.711895	0.469448	0.477942	0.424981	0.127623	0.515829	0.373043	0.53024	0.523797	0.553763	0.539369	0.487799	0.350209	-0.624734	0.174411	0.461142	0.527478	0.507137
TCGA.36.1580.01	cluster8	0.368856	0.424226	0.462798	0.498827	0.395318	0.481833	0.494446	0.490198	0.395585	0.453749	0.345308	0.370869	0.351144	0.435671	-0.284639	0.78217	0.445056	0.572101	0.416123
TCGA.13.0883.01	cluster8	0.145547	-0.264047	0.183951	0.0183028	0.232463	0.305717	-0.0629888	0.189807	-0.0340389	-0.0526074	-0.0492761	0.0941249	0.154772	0.0596219	-0.356466	-0.0539775	0.353483	-0.263594	0.110578
TCGA.61.2610.02	cluster8	0.392783	0.388582	0.400525	0.52662	0.301551	0.472722	0.410089	0.161052	0.382404	0.391194	0.339882	0.229516	0.273552	0.214726	0.691087	0.554572	0.0113094	0.292131	0.320949
TCGA.29.1778.01	cluster8	0.233706	0.596975	0.183103	0.00553193	0.0128974	0.14167	0.517563	-0.183619	0.403322	0.425458	0.569248	0.500143	0.146771	0.176123	0.594881	-0.0499991	0.0155806	-0.0236129	0.234024
TCGA.13.0791.01	cluster8	-0.0259459	0.618664	-0.113635	-0.217576	-0.233508	-0.00433769	0.422891	0.111901	0.341557	0.361397	0.479619	0.464231	-0.151354	-0.114691	-0.430759	0.434513	-0.0733767	-0.136303	0.118541
TCGA.04.1654.01	cluster8	0.31903	0.134702	0.181722	0.0874626	0.0454695	0.438807	0.0475121	0.010179	0.113344	0.174235	0.0842775	0.213079	-0.120566	0.0245863	-0.116701	0.220109	0.0759431	0.327436	0.119231
TCGA.29.1766.01	cluster8	-0.00419715	0.435038	-0.0454047	0.0272708	-0.265018	0.0754466	0.296095	0.0267091	0.146128	0.117736	0.216811	0.103097	-0.152343	-0.0267814	-0.489667	0.7518	-0.250394	0.0447972	-0.00746696
TCGA.23.1124.01	cluster8	0.157583	0.472602	0.172186	0.222324	0.204835	-0.209059	0.376287	0.0284614	0.151574	0.272198	0.28757	0.311035	0.245216	-0.0171751	-0.0447755	0.0857784	0.222645	-0.264347	0.179435
TCGA.61.1734.01	cluster8	-0.232651	0.0224364	-0.0821202	-0.288635	-0.0493526	-0.167384	-0.0490388	0.0551865	-0.0939911	-0.0480437	0.0854432	0.0132247	0.0077733	-0.273456	-0.624594	-0.396473	-0.19675	-0.525762	-0.183499
TCGA.04.1353.01	cluster8	0.155869	0.344004	0.135674	0.269601	-0.0339756	0.333189	0.22723	0.143868	0.193402	0.129473	0.156441	0.00482409	-0.0432544	0.176313	0.101712	-0.479484	0.228168	0.200479	0.184222
TCGA.25.2399.01	cluster8	0.283039	0.851325	0.421288	0.611369	0.369596	0.486725	0.561953	0.486755	0.367947	0.452106	0.522946	0.39854	0.284515	0.390074	0.268814	0.196468	0.363602	0.391872	0.368489
TCGA.36.2549.01	cluster8	0.528141	0.435963	0.518928	0.614438	0.631099	0.614849	0.387055	0.516713	0.506837	0.521134	0.504204	0.440754	0.634286	0.625892	0.29659	0.201677	0.579115	0.699042	0.540911
TCGA.13.0792.01	cluster8	-0.155669	0.654156	0.292506	-0.0308106	0.0844952	0.372123	0.590625	0.0109999	0.411918	0.312917	0.528453	0.412034	0.0530558	0.313953	-0.0788709	-0.410296	0.103445	0.11641	0.235757
TCGA.04.1369.01	cluster8	0.262197	-0.354905	0.411188	0.394606	0.474867	0.604648	0.167177	0.464561	0.192566	0.144994	-0.0239607	0.273282	0.483841	0.529266	0.474186	-0.517314	0.361136	0.132334	0.313576
TCGA.13.0801.01	cluster8	0.541705	0.384493	0.665835	0.435277	0.637783	0.706503	0.552378	0.584867	0.505616	0.527213	0.522915	0.475608	0.658022	0.782005	0.331139	-0.331399	0.657314	0.328254	0.554166
TCGA.29.1769.01	cluster8	0.221191	0.312365	0.140049	0.177789	0.156787	-0.0769911	0.220231	0.397766	0.0985294	-0.0633665	-0.0200476	-0.0867217	0.18543	0.0581965	-0.207441	0.212267	0.362397	-0.279714	0.174
TCGA.13.1507.01	cluster8	0.425722	0.642679	0.563817	0.417344	0.416371	0.543249	0.660229	0.570912	0.583616	0.55934	0.595429	0.61636	0.493802	0.425177	0.0295658	0.484561	0.340702	0.766169	0.484517
TCGA.10.0935.01	cluster8	-0.362235	-0.0376011	-0.538207	-0.543876	-0.511883	-0.524077	-0.315267	-0.558969	-0.382839	-0.357792	-0.355691	-0.178231	-0.492726	-0.551467	-0.185724	-0.0661526	-0.481299	-0.249807	-0.444224
TCGA.24.1428.01	cluster8	0.370744	0.44619	0.556942	0.351108	0.584961	0.650686	0.508715	0.457315	0.445368	0.38905	0.448276	0.455207	0.624073	0.599	-0.0748057	-0.501851	0.443837	0.352261	0.454115
TCGA.24.1924.01	cluster8	0.611039	0.719913	0.673024	0.698719	0.678613	0.707883	0.704352	0.709904	0.655996	0.63727	0.669945	0.730938	0.708026	0.672934	0.527807	0.0146692	0.594588	0.689295	0.637462
TCGA.13.0910.01	cluster8	0.375965	0.189602	-0.0937822	-0.0919644	-0.260601	-0.145243	0.188636	-0.522765	0.414353	0.420065	0.234543	0.584577	-0.202264	-0.321439	-0.393599	-0.0504442	-0.305674	-0.00112027	0.0900715
TCGA.25.2409.01	cluster8	0.36715	0.717052	0.484978	0.47446	0.375761	0.498309	0.464701	0.388077	0.388567	0.427456	0.398189	0.275784	0.400155	0.341052	0.0143738	0.68749	0.429172	0.333303	0.392637
TCGA.20.1687.01	cluster8	0.339218	-0.0957288	0.199104	0.210691	0.234087	-0.0855006	0.244096	0.364249	0.24895	0.328815	0.262327	0.109636	0.302631	0.193434	0.370283	0.433733	0.408604	0.232223	0.30037
TCGA.23.1119.01	cluster8	0.326167	0.510851	0.292706	0.279424	0.243498	0.265628	0.519058	0.37248	0.437342	0.477689	0.502763	0.434538	0.292247	0.0809539	0.366882	-0.150535	0.370753	0.650104	0.379681
TCGA.25.2392.01	cluster8	0.712483	-0.536441	0.649473	0.743042	0.723317	0.809053	0.156767	0.676095	0.474947	0.421731	0.1757	0.462256	0.651424	0.80114	0.476007	-0.334973	0.809422	0.60757	0.594472
TCGA.13.0803.01	cluster8	0.0729263	0.432449	-0.00283887	-0.363072	-0.191474	-0.320857	0.359365	-0.276528	0.206456	0.223607	0.318918	0.276746	-0.108795	-0.276167	0.271935	0.0716556	-0.0877557	-0.303453	-0.00831238
TCGA.09.2043.01	cluster8	0.2004	0.516703	0.162121	0.320895	0.0188596	0.251329	0.419469	0.341912	0.323446	0.337976	0.32902	0.205962	-0.0566846	0.162784	0.0165207	-0.210654	0.324864	0.278836	0.265402
TCGA.13.1500.01	cluster8	-0.0613386	-0.437672	-0.207963	-0.12845	0.027547	-0.221673	-0.195918	-0.482891	0.0458681	-0.181998	-0.0107985	-0.0394358	-0.206982	-0.190565	-0.0636357	0.329762	-0.157242	0.228145	-0.0333238
TCGA.61.2016.01	cluster8	0.195323	0.124799	0.119476	0.14173	0.284826	-0.29121	0.183093	0.406196	-0.0190519	0.00869674	-0.0894438	-0.157176	0.236857	0.131432	0.681757	-0.514509	0.152238	0.0137622	0.166882
TCGA.29.1707.01	cluster8	0.437254	0.465659	0.584571	0.536178	0.534299	0.498235	0.541327	0.641836	0.366781	0.47657	0.475931	0.26394	0.52607	0.609376	0.3375	-0.605489	0.586688	0.41426	0.487736
TCGA.20.1685.01	cluster8	0.0260215	-0.352288	0.488562	0.522621	0.478513	0.486927	-0.182441	0.47118	0.200137	0.0784505	-0.00886667	0.233481	0.364548	0.564275	-0.310003	-0.563793	0.566965	0.382875	0.329723
TCGA.24.1549.01	cluster8	0.23406	0.733006	0.243147	0.223172	0.0322126	0.185222	0.545757	0.0146168	0.440784	0.488411	0.540035	0.350565	0.187632	0.119194	-0.497535	-0.675033	-0.190884	0.380384	0.271373
TCGA.13.1405.01	cluster8	0.245564	0.735652	0.310048	0.0251081	0.151308	0.0275031	0.570827	0.142402	0.431675	0.529731	0.471792	0.360829	0.256477	0.171481	0.649103	0.576551	0.312522	0.0965758	0.330451
TCGA.24.1923.01	cluster9	-0.299231	-0.518656	-0.319449	-0.00413935	-0.40725	-0.55215	-0.260972	-0.175698	-0.258105	-0.268624	-0.279611	-0.312089	-0.316196	-0.301205	0.108626	0.599251	0.0972495	-0.685467	-0.244715
TCGA.24.1431.01	cluster9	-0.150852	-0.115174	-0.212671	0.046558	-0.178672	-0.323563	-0.12793	-0.150417	-0.243984	-0.1331	-0.219023	-0.234418	-0.243073	-0.250826	-0.320453	-0.147651	-0.0188437	-0.385438	-0.221137
TCGA.09.1675.01	cluster9	-0.401727	-0.448157	-0.486657	-0.375586	-0.534182	-0.518388	-0.452725	-0.561212	-0.373933	-0.445167	-0.28273	-0.272948	-0.506857	-0.582335	-0.39883	-0.61649	-0.572264	-0.540882	-0.52074
TCGA.09.2045.01	cluster9	0.322783	-0.330414	-0.069962	0.0684429	0.0902883	-0.134663	-0.123426	-0.0126797	-0.227452	-0.225644	-0.441493	-0.244908	0.127282	-0.148823	-0.0753981	-0.533584	0.12669	-0.157746	-0.00986729
TCGA.09.2055.01	cluster9	0.224824	0.0811801	0.0188862	0.0137728	-0.0893207	-0.00290228	0.0162257	-0.0515515	-0.185619	-0.180891	-0.0654335	0.0831359	-0.139606	-0.145478	0.127016	-0.331917	-0.343567	0.613948	-0.132273
TCGA.04.1347.01	cluster9	-0.665018	-0.613232	-0.631665	-0.699439	-0.655495	-0.80773	-0.627969	-0.562745	-0.590671	-0.597256	-0.610867	-0.639301	-0.618506	-0.672962	-0.602004	-0.33299	-0.671587	-0.618059	-0.612461
TCGA.57.1993.01	cluster9	-0.263383	-0.651945	-0.315323	-0.0875491	-0.0323337	-0.0368924	-0.502667	-0.162133	-0.506262	-0.549435	-0.585314	-0.627031	-0.179172	0.0790477	-0.447249	-0.34571	-0.0959676	-0.116855	-0.328345
TCGA.24.1555.01	cluster9	-0.298717	-0.421766	-0.29498	-0.484532	-0.250199	-0.223116	-0.206065	-0.203191	-0.189556	-0.255107	-0.176453	-0.00958277	-0.289892	-0.185299	-0.582098	-0.547482	-0.312111	-0.301485	-0.281904
TCGA.20.0990.01	cluster9	-0.469495	-0.389017	-0.563855	-0.486114	-0.550734	-0.65355	-0.524926	-0.660543	-0.505216	-0.455024	-0.401418	-0.532306	-0.526357	-0.60007	-0.311767	-0.614904	-0.557914	-0.469198	-0.517847
TCGA.10.0925.01	cluster9	-0.4886	-0.396248	-0.504149	-0.499245	-0.489971	-0.659148	-0.470764	-0.328988	-0.44754	-0.476895	-0.435538	-0.324506	-0.56135	-0.593717	-0.385339	-0.50256	-0.405931	-0.183805	-0.463257
TCGA.25.1321.01	cluster9	-0.382267	-0.776838	-0.34208	-0.321569	-0.208302	-0.0953545	-0.545173	-0.269991	-0.456204	-0.435288	-0.573353	-0.608101	-0.156047	-0.152194	-0.619125	-0.570971	-0.124643	-0.54786	-0.334281
TCGA.25.1312.01	cluster9	0.154368	-0.319056	-0.0649714	-0.335978	-0.0234634	0.132777	-0.276131	-0.236223	-0.317061	-0.277065	-0.395703	-0.476168	0.0446553	0.264163	-0.373166	-0.143227	-0.0191653	0.0547938	-0.204584
TCGA.25.1319.01	cluster9	-0.338109	-0.405402	-0.0691789	-0.345634	0.173332	0.0471957	-0.198825	-0.167632	-0.201789	-0.167186	-0.2322	-0.276938	0.187641	0.259156	-0.315251	-0.300374	-0.0573071	-0.233583	-0.123604
TCGA.24.1471.01	cluster9	-0.0434927	-0.357743	-0.0653635	-0.31787	-0.283657	-0.480508	-0.210066	0.209722	-0.0374824	-0.104601	-0.221594	-0.0494389	-0.209111	0.0127796	0.27511	-0.618769	0.154603	-0.105933	-0.0876424
TCGA.13.0913.01	cluster9	-0.592872	-0.76339	-0.651966	-0.676751	-0.535347	-0.639053	-0.671421	-0.722957	-0.682625	-0.6383	-0.717646	-0.641204	-0.501007	-0.708914	-0.540822	-0.588326	-0.684095	-0.13332	-0.604459
TCGA.23.1032.01	cluster9	-0.502142	-0.702707	-0.5849	-0.733397	-0.606167	-0.66709	-0.686858	-0.644448	-0.488622	-0.564817	-0.60997	-0.489066	-0.557977	-0.612233	-0.703856	-0.6961	-0.675684	-0.562277	-0.571994
TCGA.61.1901.01	cluster9	-0.279296	-0.207457	-0.158968	-0.169615	-0.0198179	-0.569972	-0.268308	0.036759	-0.19043	-0.285212	-0.204805	-0.220042	-0.184368	0.164283	0.0154439	0.14309	0.115078	-0.0660068	-0.160189
TCGA.24.1552.01	cluster9	-0.593987	-0.544125	-0.471642	-0.499663	-0.355861	-0.388898	-0.55763	-0.492582	-0.465581	-0.467898	-0.424379	-0.565838	-0.517412	-0.346847	-0.0419003	-0.338891	-0.562438	-0.452279	-0.457094
TCGA.29.1696.01	cluster9	-0.488287	-0.298654	-0.40942	-0.451443	-0.413955	-0.376833	-0.317152	-0.436716	-0.360666	-0.45088	-0.389665	-0.393389	-0.434466	-0.406025	0.0432381	-0.518535	-0.499041	-0.135426	-0.406426
TCGA.10.0934.01	cluster9	-0.36907	-0.617868	-0.6584	-0.660616	-0.500809	-0.701055	-0.706437	-0.744869	-0.609407	-0.621138	-0.702888	-0.652878	-0.616377	-0.662481	-0.372948	-0.445495	-0.57716	-0.117453	-0.572266
TCGA.25.1328.01	cluster9	0.161302	0.412193	0.292594	0.288521	0.0121512	-0.0567576	0.221967	0.353012	0.201441	0.202928	0.0360228	0.0920782	0.0108485	0.305139	0.324999	0.71874	0.388974	-0.335585	0.176558
TCGA.61.2096.01	cluster9	-0.418457	-0.568556	-0.380794	-0.478403	-0.424534	-0.314852	-0.505049	-0.463535	-0.438629	-0.523904	-0.469927	-0.533367	-0.456146	-0.471578	-0.331601	-0.675509	-0.435919	-0.00714761	-0.434219
TCGA.24.1413.01	cluster9	0.0151665	-0.283531	-0.230728	-0.0946133	-0.233973	0.0656419	-0.175364	0.10309	-0.360309	-0.291408	-0.384353	-0.376813	-0.182947	-0.1431	-0.209108	-0.232197	-0.155365	-0.190296	-0.231286
TCGA.36.1575.01	cluster9	-0.701532	-0.647333	-0.641244	-0.63272	-0.581666	-0.626838	-0.609486	-0.466916	-0.596906	-0.61562	-0.545598	-0.654705	-0.593402	-0.612428	-0.622354	-0.600617	-0.58199	-0.608822	-0.586743
TCGA.09.2048.01	cluster9	-0.582176	-0.636657	-0.593036	-0.574277	-0.617051	-0.626921	-0.643077	-0.480071	-0.593548	-0.572677	-0.643693	-0.575336	-0.645856	-0.628689	-0.597103	-0.0528289	-0.660974	-0.579646	-0.603822
TCGA.09.1670.01	cluster9	-0.0239492	-0.369057	0.119115	0.283282	0.0841513	-0.364937	-0.302914	0.456357	-0.151589	-0.100127	-0.0889004	-0.0906054	0.0926528	0.102691	-0.510113	-0.644633	0.415109	-0.0417586	0.139184
TCGA.04.1655.01	cluster9	-0.367069	-0.256415	-0.497574	-0.58582	-0.564651	-0.622611	-0.401226	-0.534416	-0.388616	-0.467398	-0.366717	-0.482843	-0.573641	-0.597702	-0.645021	0.0518169	-0.458261	-0.349046	-0.467821
TCGA.24.1426.01	cluster9	-0.247786	-0.31658	-0.329812	-0.453073	-0.473208	-0.586705	-0.354521	-0.349843	-0.299313	-0.247294	-0.337964	-0.398051	-0.479411	-0.315321	-0.130866	0.226664	-0.352643	-0.513843	-0.35605
TCGA.36.2551.01	cluster9	0.00559483	-0.351172	-0.225578	-0.177667	0.00398517	0.328947	-0.265685	-0.0710695	-0.235472	-0.338291	-0.29453	-0.38762	-0.0104155	-0.0660052	0.535663	-0.533901	-0.287085	0.582139	-0.17083
TCGA.25.1313.01	cluster9	0.272753	-0.512714	0.510512	0.565033	0.593832	0.638738	-0.0455123	0.623518	0.0462726	0.0585199	-0.060976	-0.41528	0.620443	0.675308	0.37049	0.597527	0.68009	0.137012	0.446569
TCGA.61.2008.01	cluster9	-0.282334	-0.400458	0.0381919	0.0147071	0.0465668	-0.12828	-0.33049	-0.0680571	-0.255922	-0.315829	-0.304396	-0.354283	0.0194304	0.123627	-0.207436	-0.0115114	0.0386528	-0.174958	-0.168723
TCGA.04.1519.01	cluster9	-0.623487	-0.658632	-0.696655	-0.600944	-0.702191	-0.81033	-0.678959	-0.660642	-0.57843	-0.607609	-0.584649	-0.672247	-0.710782	-0.736478	-0.67648	-0.372872	-0.669962	-0.601194	-0.631893
TCGA.36.1570.01	cluster9	-0.419978	-0.610175	-0.378118	-0.475242	-0.419472	-0.136535	-0.479277	-0.514906	-0.48813	-0.492592	-0.458088	-0.565633	-0.347028	-0.382629	-0.458856	-0.529425	-0.534731	0.255987	-0.422498
TCGA.04.1514.01	cluster9	-0.708081	-0.748213	-0.708981	-0.695799	-0.736474	-0.851433	-0.657517	-0.631309	-0.671423	-0.642939	-0.716249	-0.736365	-0.689754	-0.754725	-0.100325	-0.414298	-0.707508	-0.604573	-0.667759
TCGA.20.1684.01	cluster9	-0.671259	-0.823916	-0.68384	-0.665199	-0.651295	-0.780545	-0.678812	-0.684962	-0.628775	-0.668626	-0.661055	-0.692706	-0.613497	-0.709461	-0.658217	-0.650195	-0.708518	-0.671493	-0.644858
TCGA.61.1738.01	cluster9	0.0249054	-0.307636	0.0478811	-0.37581	-0.0636576	-0.0642203	-0.327119	0.0673624	-0.319097	-0.408337	-0.281101	-0.412417	0.00416421	-0.0666841	-0.297303	-0.611881	-0.222006	0.283632	-0.147168
TCGA.61.1733.01	cluster9	-0.233253	-0.538059	-0.31885	-0.184021	-0.333008	-0.309102	-0.470289	-0.0673408	-0.410463	-0.441495	-0.508244	-0.560061	-0.347028	-0.274604	-0.154317	0.475702	-0.289369	-0.31412	-0.34801
TCGA.13.0799.01	cluster9	-0.259971	-0.444939	-0.537836	-0.654682	-0.646359	-0.527647	-0.520189	-0.523814	-0.471712	-0.502378	-0.439837	-0.295447	-0.586019	-0.642423	-0.417746	-0.63037	-0.61807	-0.372202	-0.524831
TCGA.30.1853.01	cluster9	-0.492152	-0.662207	-0.587698	-0.667126	-0.609943	-0.67737	-0.633253	-0.647182	-0.541171	-0.589392	-0.582767	-0.513285	-0.680556	-0.606518	-0.408732	-0.305262	-0.646286	-0.563341	-0.592272
TCGA.29.1774.01	cluster9	-0.572407	-0.623816	-0.63168	-0.77436	-0.66932	-0.629579	-0.624568	-0.624069	-0.527732	-0.551646	-0.583465	-0.583448	-0.698748	-0.603251	-0.454968	0.21428	-0.638793	-0.499023	-0.585497
TCGA.23.1024.01	cluster9	-0.321655	-0.612706	-0.452446	-0.585394	-0.53384	-0.601673	-0.468999	-0.635244	-0.401599	-0.442237	-0.278714	-0.437775	-0.413003	-0.509432	-0.584844	-0.688694	-0.551279	-0.430245	-0.462249
TCGA.04.1644.01	cluster9	-0.570495	-0.557563	-0.545835	-0.537653	-0.598306	-0.683673	-0.626986	-0.493933	-0.622783	-0.592044	-0.646208	-0.572612	-0.6227	-0.573901	-0.553408	-0.144502	-0.617662	-0.626546	-0.581629
TCGA.04.1516.01	cluster9	0.361312	-0.533028	-0.18668	0.156302	-0.0153762	-0.212426	-0.466782	0.0804235	-0.262416	-0.326234	-0.501192	-0.301164	0.0697534	-0.276955	-0.154638	-0.59745	-0.0246389	-0.0465426	-0.087414
TCGA.30.1856.01	cluster10	0.675355	0.800486	0.63768	0.646063	0.467145	0.490245	0.740703	0.607264	0.691739	0.730595	0.742343	0.685523	0.476768	0.565456	0.450974	-0.05837	0.585504	0.299521	0.597453
TCGA.23.2645.01	cluster10	0.751364	0.507113	0.541668	0.6792	0.550672	0.72516	0.601147	0.620326	0.535557	0.60978	0.582295	0.551184	0.568342	0.508998	0.463046	-0.303033	0.639722	0.711677	0.568834
TCGA.24.0968.01	cluster10	0.453886	0.655646	0.533628	0.350772	0.490062	0.350189	0.625923	0.507798	0.491471	0.580769	0.538989	0.565611	0.52591	0.504384	0.455293	0.310243	0.572621	0.265311	0.491729
TCGA.24.1930.01	cluster10	0.687873	0.541242	0.734447	0.683463	0.677543	0.825699	0.574648	0.718633	0.698339	0.627962	0.576965	0.608588	0.702392	0.697406	0.654713	0.675578	0.723789	0.653586	0.669495
TCGA.04.1348.01	cluster10	0.497858	0.781762	0.604325	0.57848	0.637823	0.616704	0.659421	0.402592	0.602643	0.608997	0.672686	0.668861	0.651664	0.663101	0.286336	-0.607527	0.568857	0.574146	0.568514
TCGA.24.2267.01	cluster10	0.767185	0.685225	0.758474	0.740376	0.70203	0.801475	0.705793	0.688945	0.766959	0.752728	0.714717	0.802221	0.779996	0.703169	0.54535	-0.36589	0.723401	0.612619	0.711531
TCGA.24.1842.01	cluster10	0.525705	0.885491	0.513555	0.499949	0.561732	0.680055	0.734919	0.517351	0.621287	0.646824	0.69931	0.637756	0.595462	0.555462	-0.495647	-0.292818	0.506239	0.412442	0.543065
TCGA.13.0885.01	cluster10	0.48662	0.662789	0.567661	0.386915	0.428994	0.582549	0.608001	0.37539	0.623356	0.619461	0.586155	0.688937	0.545365	0.543573	0.0938436	0.216185	0.553835	0.134774	0.544753
TCGA.29.1710.01	cluster10	0.763364	0.782367	0.725868	0.750889	0.691628	0.763296	0.786361	0.670467	0.739269	0.777018	0.77194	0.810537	0.678407	0.790204	-0.0378225	0.506169	0.698162	0.655199	0.708622
TCGA.29.1711.01	cluster10	0.592057	0.700871	0.490684	0.582304	0.462177	0.541092	0.641371	0.245091	0.562409	0.600205	0.653431	0.59209	0.540809	0.3287	0.365382	-0.276739	0.462022	0.131008	0.529499
TCGA.36.1581.01	cluster10	0.715586	0.613096	0.556284	0.536458	0.427527	0.704049	0.63063	0.484093	0.700482	0.648071	0.659641	0.730439	0.485583	0.490509	0.276087	-0.196259	0.407894	0.573771	0.525826
TCGA.36.1569.01	cluster10	0.539141	0.484294	0.557233	0.549581	0.361546	0.624429	0.630969	0.527089	0.665511	0.651424	0.571842	0.680595	0.370674	0.540017	-0.072327	0.719376	0.493834	0.535869	0.534831
TCGA.24.2271.01	cluster10	0.588134	0.656271	0.46249	0.521791	0.375826	0.545115	0.659715	0.404891	0.662326	0.637664	0.63324	0.739877	0.455908	0.474511	0.22466	0.519004	0.477572	0.430759	0.526649
TCGA.13.2057.01	cluster10	0.522704	0.63245	0.468268	0.485795	0.351964	0.516743	0.600298	0.323027	0.631439	0.649918	0.648022	0.75056	0.45177	0.365722	0.428885	0.495397	0.402096	0.434741	0.51161
TCGA.04.1346.01	cluster10	0.558544	0.663703	0.556774	0.482743	0.501005	0.520184	0.642024	0.550085	0.519777	0.566504	0.605855	0.534143	0.539754	0.55037	-0.36929	-0.168603	0.623286	0.380927	0.525996
TCGA.59.2351.01	cluster10	0.441082	0.594366	0.546387	0.647308	0.615791	0.595363	0.451663	0.59788	0.614649	0.541898	0.525245	0.58267	0.621476	0.638452	0.176447	0.106438	0.632233	0.684011	0.556727
TCGA.30.1860.01	cluster10	0.473968	0.876018	0.582363	0.554634	0.47007	0.575465	0.789805	0.620877	0.700894	0.689507	0.753668	0.75022	0.583628	0.523419	-0.00414067	0.286609	0.518346	0.522796	0.576993
TCGA.29.1690.01	cluster10	0.498032	0.443163	0.586652	0.415702	0.535483	0.536167	0.551167	0.627549	0.552557	0.433292	0.498054	0.593684	0.383128	0.661477	-0.16526	0.659882	0.616513	0.0124474	0.487818
TCGA.23.1123.01	cluster10	0.421702	0.612083	0.549686	0.361989	0.45114	0.603974	0.64958	0.399977	0.605443	0.635464	0.689435	0.62565	0.572026	0.613566	0.156074	-0.558377	0.469359	0.15302	0.528415
TCGA.24.2029.01	cluster10	0.617667	0.663428	0.523362	0.722735	0.474922	0.609938	0.644335	0.727547	0.550288	0.580567	0.554485	0.576869	0.454663	0.440482	0.65067	0.548616	0.500398	0.547868	0.534709
TCGA.13.1412.01	cluster10	-0.00924803	0.00689712	-0.0572398	-0.189662	-0.0985859	-0.318014	-0.167214	-0.38263	0.166524	0.0830517	-0.0243131	0.286906	-0.0471407	-0.149157	-0.43347	0.331052	0.0474861	-0.128464	-0.0281043
TCGA.36.2552.01	cluster10	0.481559	0.82048	0.522941	0.60543	0.515209	0.645653	0.632897	0.519209	0.652016	0.677427	0.655507	0.657424	0.46809	0.573301	0.525401	0.593986	0.543826	0.490861	0.561586
TCGA.13.1817.01	cluster10	0.661662	0.48122	0.609758	0.685462	0.557709	0.604306	0.57186	0.554271	0.630707	0.644652	0.628139	0.619275	0.603096	0.54939	0.616943	-0.290864	0.67955	0.693284	0.63186
TCGA.23.2079.01	cluster10	0.485457	0.566063	0.471103	0.27505	0.333106	0.497798	0.543253	0.334555	0.456883	0.389163	0.41277	0.487723	0.324129	0.352296	0.429048	-0.20139	0.417165	-0.278507	0.395541
TCGA.42.2593.01	cluster10	0.79943	0.637384	0.764751	0.811471	0.745093	0.837426	0.678979	0.619146	0.751526	0.75312	0.73384	0.835955	0.818707	0.788236	0.592871	-0.416723	0.727676	0.761839	0.725689
TCGA.57.1994.01	cluster10	0.454951	0.746375	0.518085	0.360349	0.411298	0.608054	0.661158	0.0819645	0.666996	0.62463	0.630083	0.743409	0.510823	0.49548	-0.506346	-0.585443	0.406942	0.364626	0.505388
TCGA.29.1784.01	cluster10	0.545409	0.624314	0.624518	0.380418	0.521967	0.753801	0.562877	0.570619	0.640791	0.560235	0.613026	0.682819	0.546692	0.596303	-0.293879	-0.404043	0.53621	0.61593	0.529151
TCGA.24.2261.01	cluster10	0.568094	0.766071	0.610766	0.586179	0.62435	0.658161	0.734933	0.661515	0.762553	0.72153	0.759745	0.808122	0.69781	0.60099	0.0704142	-0.0278537	0.668247	0.39759	0.653757
TCGA.04.1349.01	cluster10	0.322772	0.776139	0.211137	0.166563	0.178186	0.400487	0.688518	0.235545	0.529371	0.579614	0.654529	0.570335	0.18958	0.329861	0.278609	0.111379	0.439316	0.350404	0.405085
TCGA.29.1781.01	cluster10	0.557689	0.894881	0.610355	0.43324	0.549837	0.863398	0.782104	0.68782	0.68637	0.708995	0.769011	0.64193	0.592875	0.7168	-0.0356497	-0.0106392	0.595846	0.636232	0.612305
TCGA.24.1470.01	cluster10	0.673379	0.674007	0.684897	0.563022	0.582008	0.623495	0.643776	0.584072	0.676662	0.674242	0.641349	0.739534	0.629053	0.651483	0.399752	-0.492487	0.646876	0.537677	0.628836
TCGA.29.2428.01	cluster10	0.35153	0.727221	0.573752	0.318984	0.573509	0.537392	0.65136	0.439277	0.611442	0.58461	0.628939	0.709899	0.553079	0.605109	-0.631545	-0.355854	0.449635	0.521153	0.505143
TCGA.24.1545.01	cluster10	0.658798	0.774639	0.62379	0.678792	0.535693	0.5901	0.707034	0.551296	0.680371	0.676393	0.720018	0.69213	0.569799	0.655303	-0.371208	0.571671	0.618652	0.675105	0.627915
TCGA.13.0723.01	cluster10	0.500764	0.806407	0.586137	0.354057	0.549406	0.652247	0.697556	0.529129	0.674996	0.653337	0.67385	0.656511	0.56747	0.580921	-0.431654	-0.589643	0.581874	0.300763	0.571679
TCGA.13.1484.01	cluster10	0.758406	0.936015	0.716565	0.61437	0.576586	0.723303	0.816502	0.519442	0.831723	0.791558	0.815092	0.885645	0.675196	0.608493	-0.361444	-0.14281	0.519325	0.669049	0.672046
TCGA.61.1727.01	cluster10	0.584658	0.860063	0.697029	0.62904	0.581082	0.759111	0.783042	0.562393	0.780563	0.741428	0.853151	0.792335	0.647147	0.608711	-0.224945	-0.189092	0.604759	0.364105	0.649877
TCGA.61.2094.01	cluster10	0.745662	0.933439	0.823709	0.679994	0.684463	0.829252	0.856176	0.630836	0.844565	0.835963	0.866158	0.865227	0.736966	0.714693	-0.167203	-0.614643	0.709503	0.786169	0.761291
TCGA.61.1995.01	cluster10	0.38086	0.389543	0.557454	0.503616	0.559261	0.204588	0.300542	0.511994	0.5138	0.505422	0.397757	0.559321	0.521408	0.601017	-0.63169	-0.329918	0.587005	-0.0713548	0.477373
TCGA.13.0795.01	cluster10	0.345456	0.470536	0.512979	0.288702	0.353023	-0.202279	0.538087	0.429392	0.437678	0.530315	0.426153	0.453651	0.377293	0.563763	0.175027	-0.393952	0.583925	0.258713	0.424155
TCGA.61.2087.01	cluster10	0.481857	0.622851	0.229312	-0.11871	0.0523585	-0.0830846	0.515678	0.0534688	0.455043	0.48235	0.558306	0.523456	0.165616	0.13694	0.407028	-0.464296	0.307017	-0.0613364	0.297929
TCGA.30.1887.01	cluster10	0.603766	0.755858	0.608608	0.554706	0.453734	0.649044	0.709322	0.673034	0.725824	0.697168	0.739089	0.735004	0.535721	0.59413	0.384494	0.768587	0.564182	0.457066	0.595963
TCGA.13.0889.01	cluster10	0.321736	0.883081	0.537906	0.362274	0.484257	0.378025	0.732441	0.29018	0.569309	0.614676	0.74233	0.585655	0.527477	0.516468	-0.140612	-0.0887421	0.321586	0.474418	0.47624
TCGA.30.1866.01	cluster10	-0.0685269	0.697288	-0.017563	-0.447812	-0.124951	0.048359	0.467229	0.0693065	0.326166	0.330876	0.307622	0.462347	-0.188715	0.000420701	-0.110575	-0.0250314	-0.110824	-0.3073	0.0721469
TCGA.10.0937.01	cluster10	-0.0434414	0.341629	-0.00520869	-0.127614	0.196883	0.523938	0.42536	0.012157	0.269998	0.194092	0.20831	0.299156	0.149529	0.187027	-0.427095	-0.527143	-0.0416435	0.0145301	0.170923
TCGA.61.1911.01	cluster10	0.63309	0.940751	0.52308	0.473002	0.362274	0.72208	0.816341	0.543068	0.760484	0.74058	0.786149	0.737333	0.429705	0.533842	-0.0637635	-0.247708	0.419741	0.714503	0.598978
TCGA.09.2044.01	cluster10	0.4657	-0.504783	0.432048	0.499581	0.466254	0.560232	0.194761	0.530715	0.194529	0.171851	0.154072	0.334709	0.486324	0.457353	0.504748	-0.36763	0.433733	0.231946	0.364947
TCGA.29.1783.01	cluster10	0.359534	0.440678	0.470236	0.348468	0.403571	0.13355	0.494125	0.57661	0.295237	0.419552	0.496296	0.13941	0.429968	0.494645	-0.0413884	0.359826	0.56499	-0.0331077	0.404692
TCGA.36.1578.01	cluster10	0.389368	0.724863	0.455544	0.284554	0.429288	0.359854	0.679731	0.459444	0.546272	0.594899	0.484115	0.53503	0.47947	0.429457	-0.0918854	-0.605073	0.477385	-0.0407592	0.454274
TCGA.04.1336.01	cluster10	0.291502	0.110354	0.244681	-0.195784	0.282988	0.36758	0.330005	0.248543	0.299558	0.298818	0.222807	0.377321	0.353962	0.358433	-0.0959178	-0.654347	0.38785	-0.0505939	0.28399
TCGA.29.1701.01	cluster10	0.0520863	0.412562	0.465507	0.277743	0.350606	0.490531	0.20929	0.454208	0.36293	0.312952	0.168244	0.382616	0.378905	0.507413	-0.188138	0.415561	0.271145	0.33048	0.317893
TCGA.13.0924.01	cluster10	0.616344	0.658551	0.593543	0.597442	0.539568	0.690946	0.609624	0.602391	0.641918	0.623678	0.558589	0.662908	0.637712	0.621774	0.28092	-0.140304	0.530213	0.533953	0.583667
TCGA.09.0366.01	cluster10	0.42398	-0.0141266	0.54252	0.531015	0.636583	0.541909	0.326813	0.654441	0.367915	0.359502	0.297823	0.101914	0.542209	0.63915	0.0139604	-0.596628	0.763547	0.123315	0.533612
TCGA.59.2349.01	cluster10	0.385025	0.455183	-0.134469	-0.104304	-0.212385	-0.378745	0.122732	-0.37416	0.468411	0.395183	0.282958	0.473946	-0.277748	-0.240214	0.268427	-0.556574	-0.147877	0.0355718	0.0902983
TCGA.24.1843.01	cluster10	0.408028	0.454415	0.574682	0.238866	0.497263	0.560112	0.423731	0.419058	0.448171	0.44527	0.392938	0.505278	0.507025	0.606948	-0.0889849	-0.325092	0.588498	0.540297	0.451472
TCGA.61.1917.01	cluster10	0.0910438	0.400423	0.406244	0.200864	0.300839	0.0943983	0.230949	0.182287	0.223507	0.224957	0.148641	0.4943	0.322728	0.417575	-0.125156	0.0828994	0.289764	0.0687756	0.246315
TCGA.36.2539.01	cluster10	0.38597	0.747079	0.403661	0.470242	0.382979	0.574754	0.601599	0.274295	0.423947	0.457488	0.44139	0.348596	0.343243	0.433597	0.0861097	0.572433	0.424174	0.165682	0.407402
TCGA.36.2547.01	cluster10	0.361075	0.388359	-0.109264	-0.00837741	-0.276546	-0.434739	0.179256	-0.380444	0.454438	0.347155	0.279116	0.522981	-0.310247	-0.284054	-0.0517739	-0.618971	-0.206378	-0.104555	0.0618883
TCGA.61.1904.01	cluster10	0.224517	0.0339827	0.162527	0.488725	0.2506	0.0349813	0.240677	0.514305	0.170244	0.228525	0.326603	-0.0375139	0.0613194	0.336752	-0.396713	0.380151	0.445823	0.198803	0.271341
TCGA.04.1343.01	cluster10	0.204643	0.122071	0.180087	-0.145161	-0.0938066	0.276322	0.420413	-0.0368522	0.293359	0.410157	0.192608	0.394134	0.166768	0.0356041	0.199255	0.444406	0.0547529	0.114508	0.169444
TCGA.29.2432.01	cluster10	0.799611	-0.662599	0.615975	0.696855	0.724809	0.859693	0.0239084	0.753348	0.478952	0.448118	0.129748	0.462212	0.676301	0.765591	0.385573	-0.399143	0.796221	0.632205	0.621643
TCGA.24.1104.01	cluster10	0.421104	0.654397	0.296323	0.374897	0.322348	0.244061	0.552958	0.430498	0.568764	0.577979	0.560518	0.596816	0.293686	0.19859	0.0806881	0.0310864	0.494266	0.533042	0.454527
TCGA.13.2060.01	cluster10	0.438484	0.682483	0.551923	0.449883	0.427778	0.411561	0.510525	0.353036	0.575661	0.524913	0.523515	0.575201	0.52563	0.369813	-0.00505705	-0.178123	0.425536	0.184947	0.483249
TCGA.42.2590.01	cluster10	0.474095	0.675669	0.567933	0.461164	0.483991	0.569817	0.561982	0.365809	0.554469	0.516906	0.522	0.560491	0.577341	0.383092	-0.154313	-0.303955	0.452389	0.26513	0.491397
TCGA.25.2396.01	cluster10	0.0320224	0.633455	0.115556	-0.120651	0.144865	0.353518	0.56077	-0.06562	0.332025	0.383903	0.354698	0.35936	0.384652	0.0942017	0.166447	-0.267266	-0.0666018	-0.195987	0.230076
TCGA.61.1915.01	cluster10	0.189041	0.459481	0.365088	0.268667	0.351576	0.439248	0.507504	0.432219	0.474947	0.476693	0.446061	0.564971	0.243595	0.498214	-0.459956	-0.343046	0.473948	-0.306038	0.3713
TCGA.13.1496.01	cluster10	0.393268	0.659446	0.413862	0.29434	0.416696	0.318895	0.553201	0.268475	0.543056	0.471122	0.574287	0.58666	0.451051	0.269733	-0.457708	-0.669798	0.353208	0.0242584	0.4192
TCGA.13.0764.01	cluster10	-0.1571	0.750975	0.02843	-0.149705	-0.177495	0.0155237	0.604417	-0.152129	0.443568	0.453166	0.54551	0.425313	0.0627531	-0.108319	-0.227196	-0.328738	-0.0623124	-0.233214	0.178977
TCGA.24.1553.01	cluster10	0.664274	0.797752	0.639732	0.69827	0.527506	0.798831	0.82887	0.580203	0.776665	0.794122	0.802895	0.809239	0.566921	0.651245	-0.537263	-0.461796	0.626747	0.632499	0.658477
TCGA.25.1878.01	cluster10	0.612862	0.712149	0.607937	0.416714	0.548906	0.764271	0.716636	0.674595	0.710909	0.673072	0.702262	0.779486	0.6013	0.62523	-0.00356665	-0.0511918	0.611686	0.347538	0.594099
TCGA.04.1357.01	cluster10	0.8189	0.937593	0.740919	0.711424	0.664774	0.917532	0.872109	0.653397	0.825796	0.82209	0.855756	0.844558	0.745357	0.798503	0.599069	0.441433	0.688141	0.690194	0.739145
TCGA.29.2427.01	cluster10	0.759026	0.887429	0.677469	0.668024	0.716611	0.860823	0.869127	0.672149	0.79035	0.800949	0.812674	0.779167	0.814632	0.739999	-0.1999	0.434705	0.746667	0.673082	0.748808
TCGA.29.1785.01	cluster10	0.536644	0.826242	0.58029	0.397692	0.500728	0.760493	0.766331	0.532428	0.700426	0.705972	0.764435	0.765617	0.607627	0.529988	-0.281714	-0.54641	0.560834	0.251808	0.5947
TCGA.24.2026.01	cluster10	0.266189	0.578777	0.32893	0.072047	0.262694	0.360467	0.351831	0.281796	0.483901	0.426511	0.325887	0.588909	0.404874	0.238019	-0.0303558	-0.25672	0.220659	0.0289704	0.287022
TCGA.13.0884.01	cluster10	0.0339491	0.762897	-0.0561429	-0.0610243	-0.213208	0.103864	0.697492	-0.104625	0.553047	0.548804	0.607591	0.689949	-0.0995873	-0.220766	-0.644481	0.525697	-0.119223	-0.0312764	0.256619
TCGA.13.0893.01	cluster10	-0.24216	0.728436	0.0271263	-0.298322	-0.000451608	0.307419	0.553107	0.0575916	0.410526	0.464506	0.53918	0.641798	-0.0750333	0.0233777	-0.148281	0.546136	-0.0743201	0.158679	0.193826
TCGA.61.1907.01	cluster10	0.603433	0.714345	0.561713	0.451398	0.453988	0.699711	0.720963	0.473282	0.724268	0.666012	0.739017	0.758106	0.512273	0.54107	0.226249	-0.649711	0.453921	0.189041	0.536476
